# Supplementary material for: Zinc-Catalyzed Enantioselective [3 + 3] Annulation for Synthesis of Chiral Spiro[indoline-3,4′-thiopyrano[2,3-b]indole] Derivatives
Source: MDPI journal article supplement (doi:10.3390/molecules28031056), 2023-01-20
Supplement: s1 [file s1]

## Supporting Information

### **Zinc-catalyzed enantioselective [3 + 3] annulation for synthesis of chiral spiro[indoline-3,4'-thiopyrano[2,3-*b*]indole] derivatives**

Tian-Tian Liu, Yu Chen, Guang-Jian Mei, Yuan-Zhao Hua,\* Shi-Kun Jia\* and  
Min-Can Wang\*

College of Chemistry and Institute of Green Catalysis, Zhengzhou University, Zhengzhou City, Henan  
450000, P. R. China

Email: hyzh@zzu.edu.cn, jiashikun@zzu.edu.cn, wangmincan@zzu.edu.cn

## Table of Contents

|                                            |            |
|--------------------------------------------|------------|
| <b>1. NMR Spectra</b>                      | <b>S2</b>  |
| <b>2. HPLC</b>                             | <b>S29</b> |
| <b>3. Single-crystal X-ray diffraction</b> | <b>S54</b> |

## NMR Spectra of compounds

<sup>1</sup>H NMR (400 MHz, DMSO-d<sub>6</sub>)

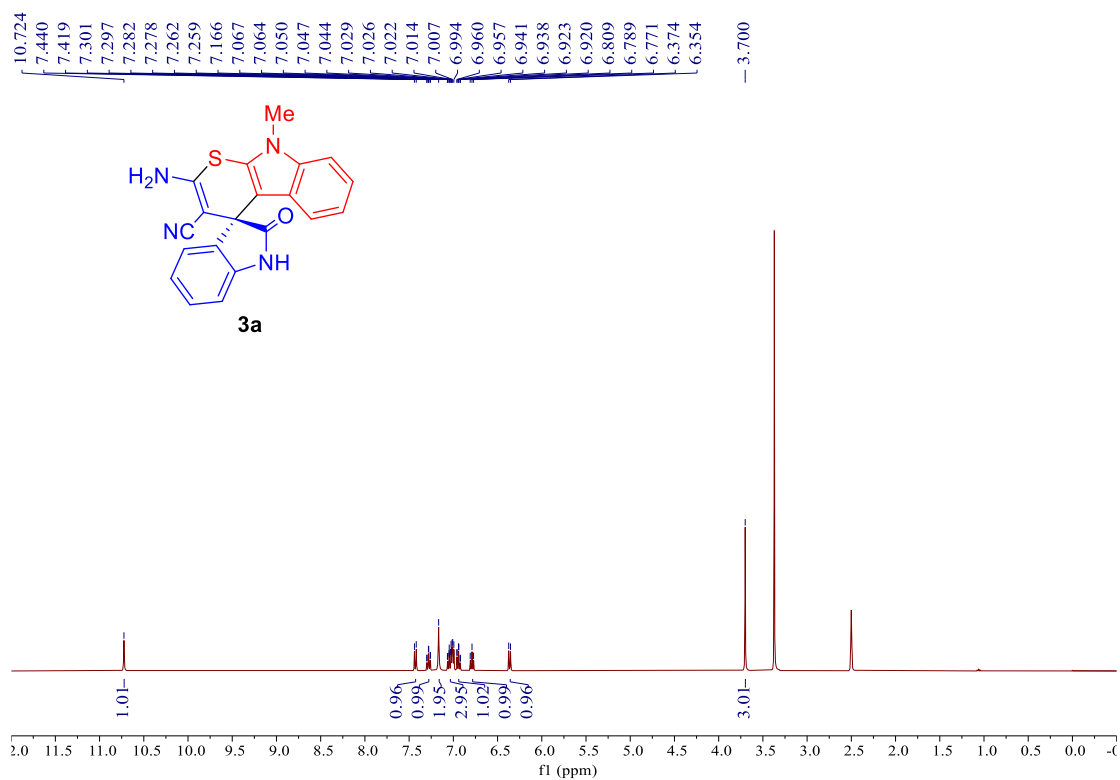

<sup>13</sup>C NMR (101 MHz, DMSO-d<sub>6</sub>)

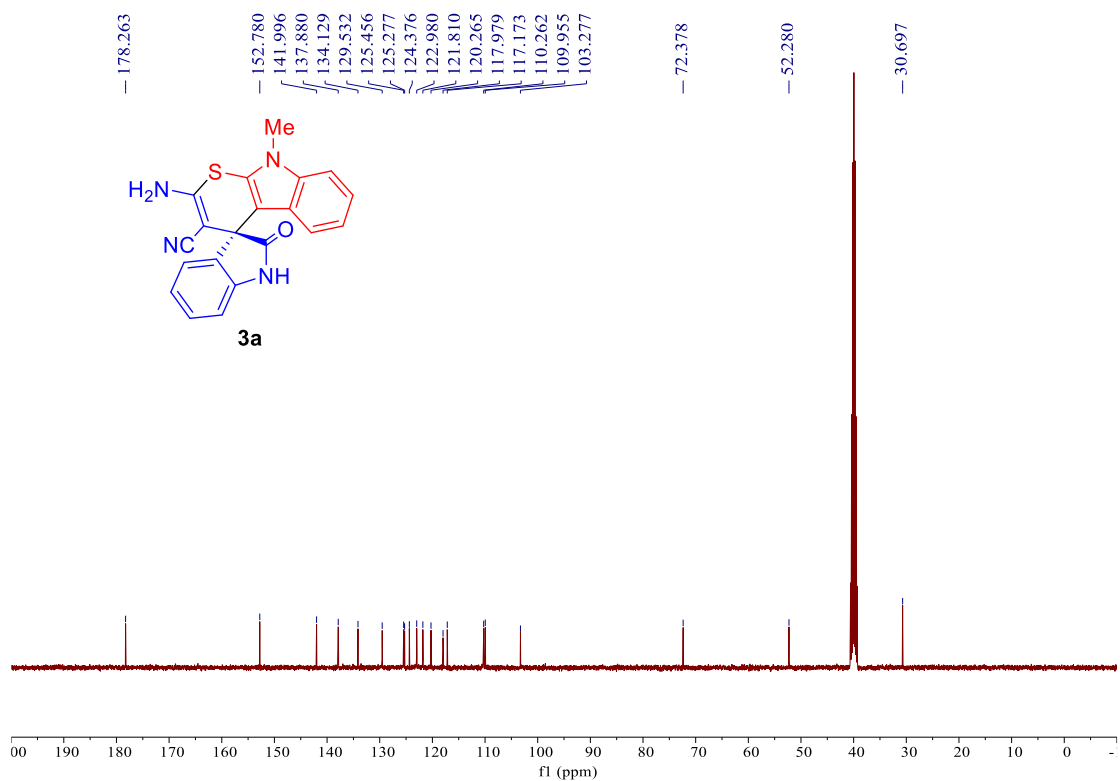

**<sup>1</sup>H NMR (400 MHz, DMSO-d<sub>6</sub>)**

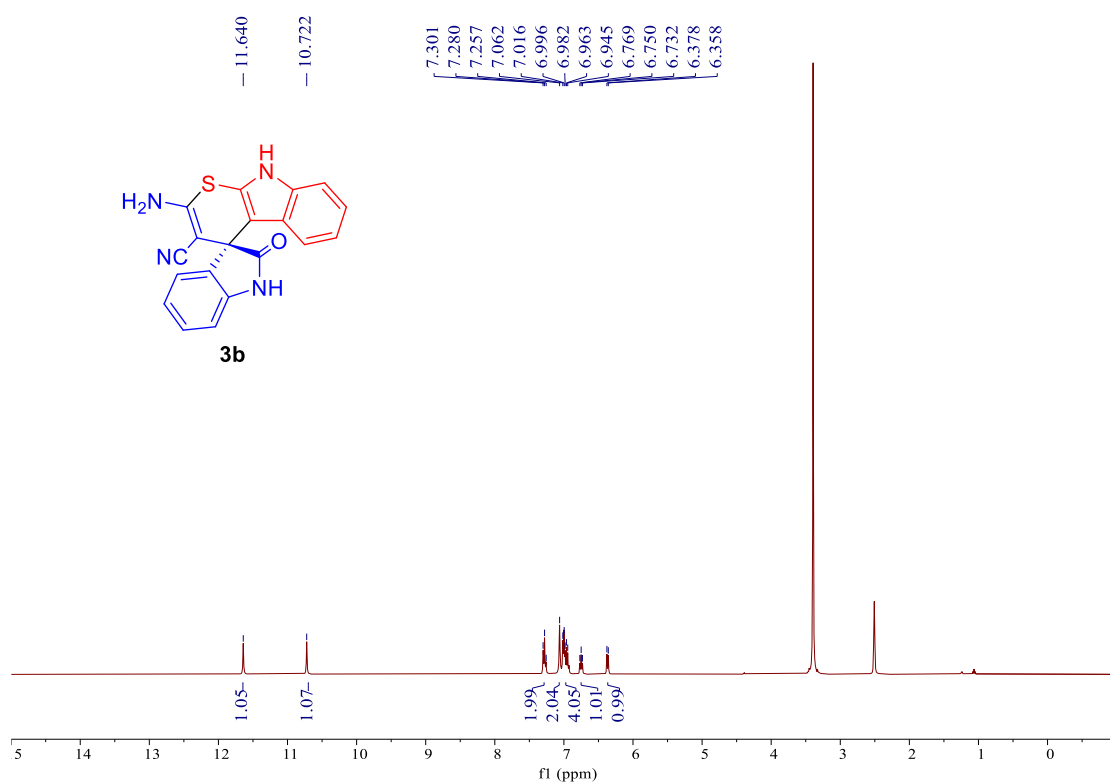

**<sup>13</sup>C NMR (101 MHz, DMSO-d<sub>6</sub>)**

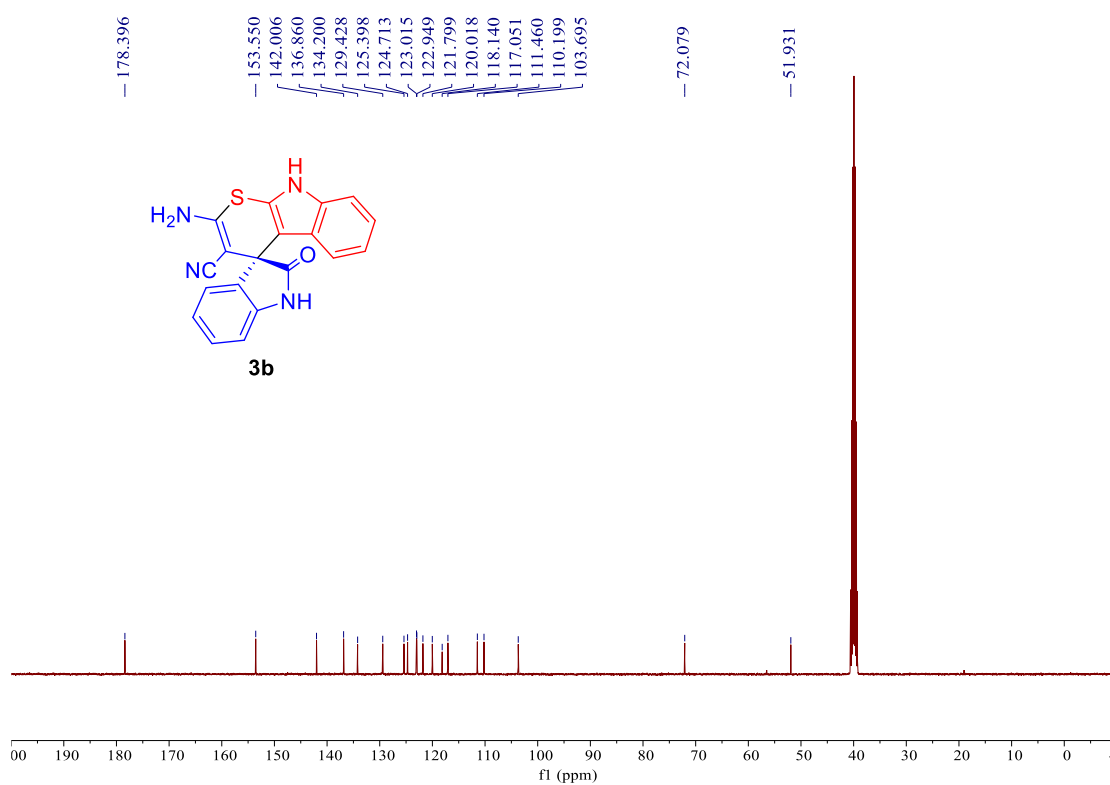

**<sup>1</sup>H NMR** (400 MHz, DMSO-d<sub>6</sub>)

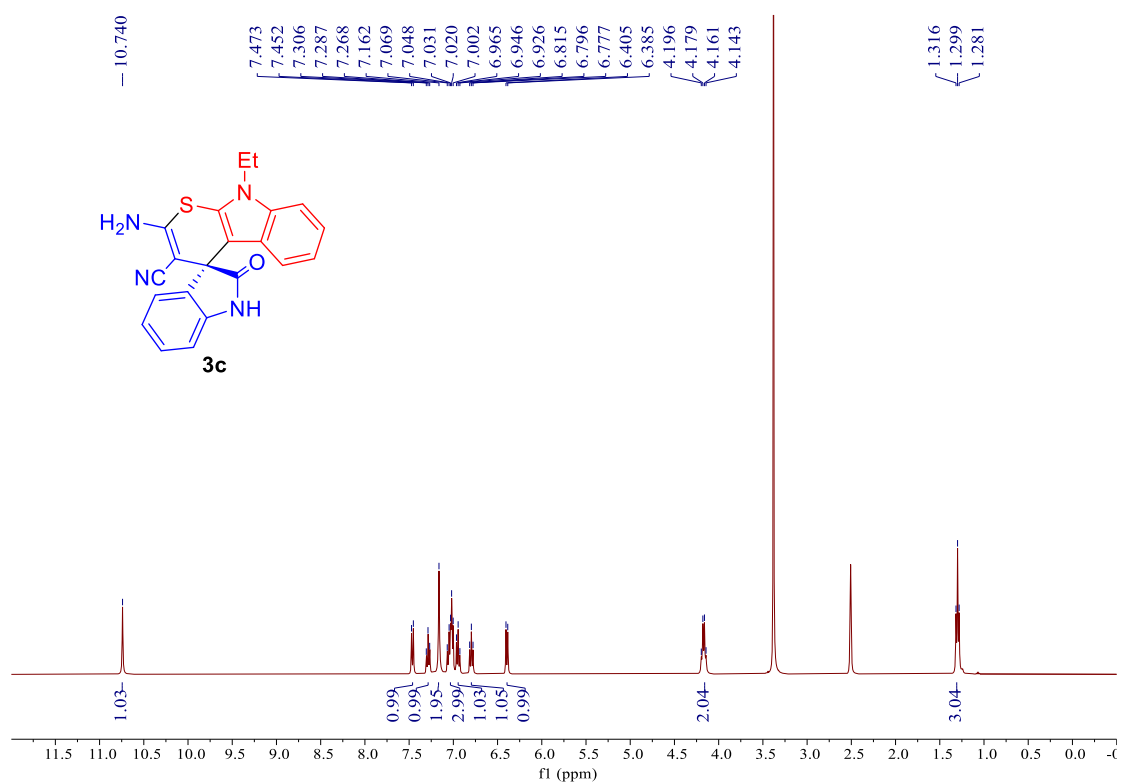

**<sup>13</sup>C NMR** (101 MHz, DMSO-d<sub>6</sub>)

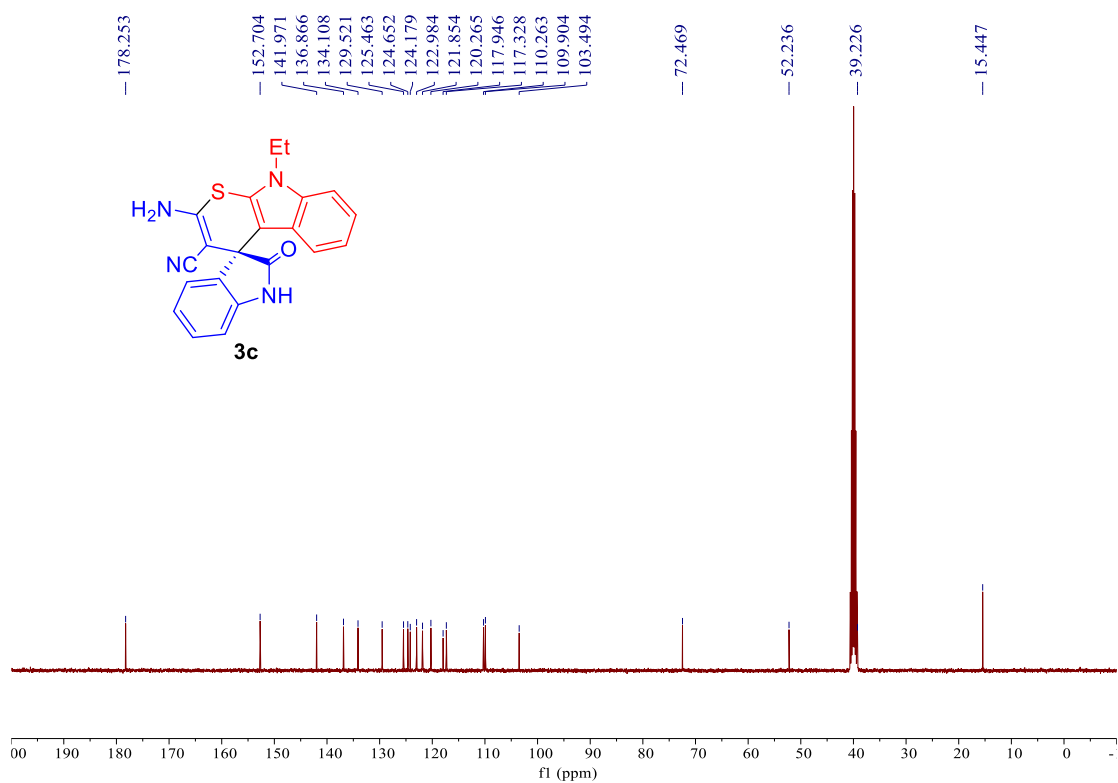

**<sup>1</sup>H NMR (400 MHz, DMSO-d<sub>6</sub>)**

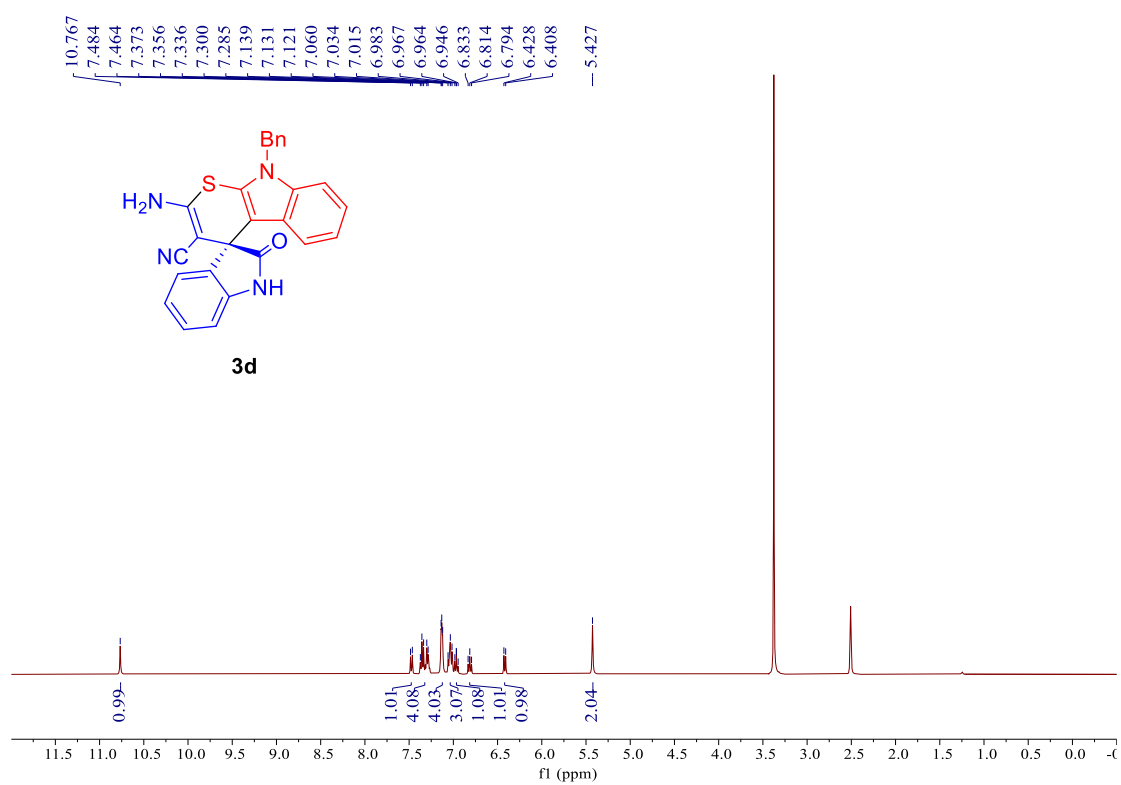

**<sup>13</sup>C NMR (101 MHz, DMSO-d<sub>6</sub>)**

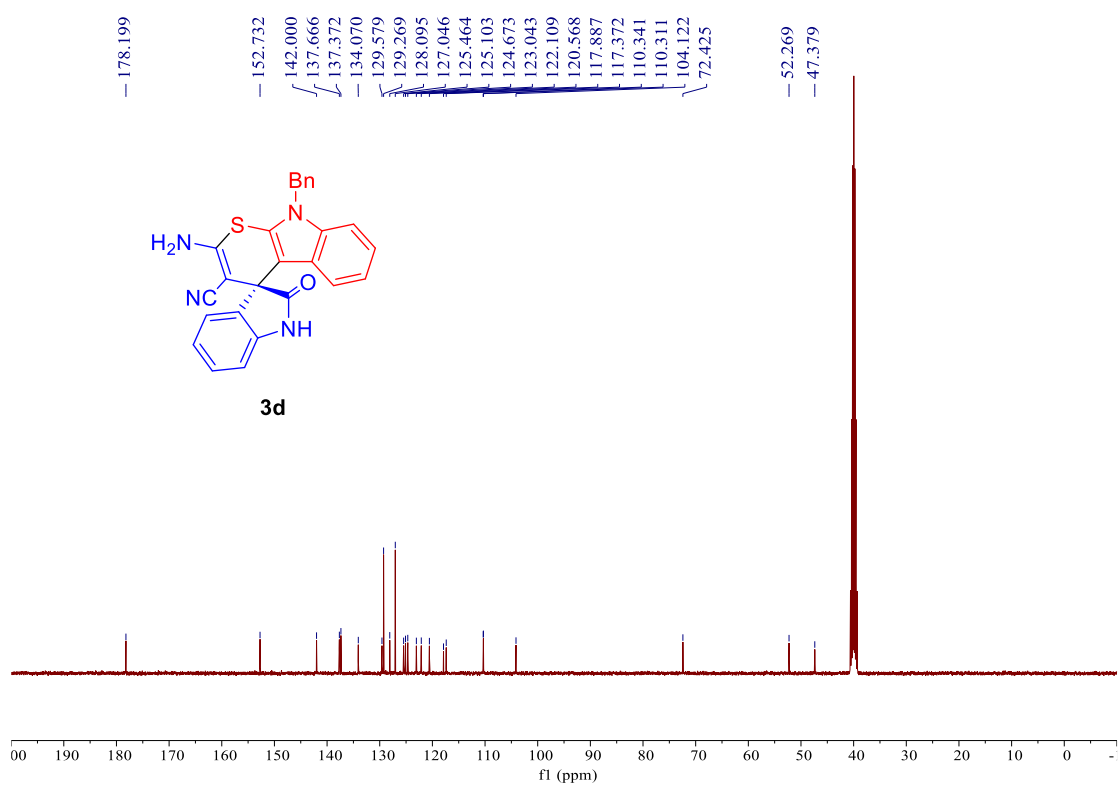

**<sup>1</sup>H NMR (400 MHz, DMSO-d<sub>6</sub>)**

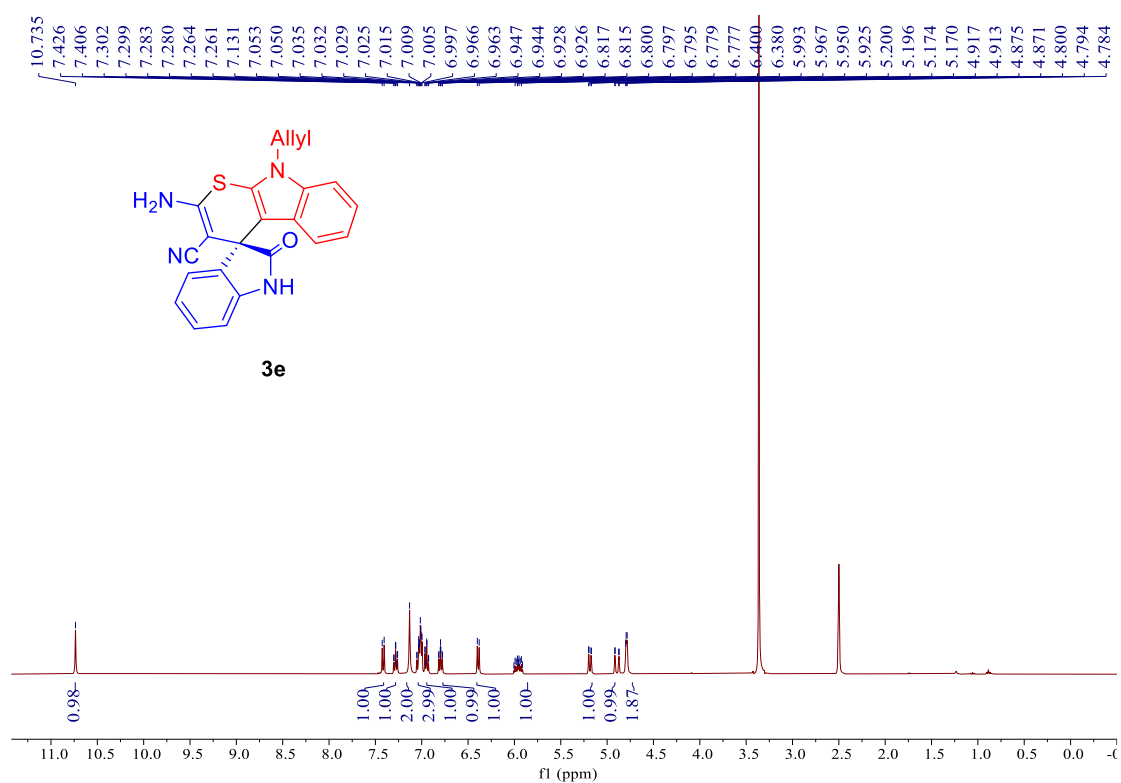

**<sup>13</sup>C NMR (101 MHz, DMSO-d<sub>6</sub>)**

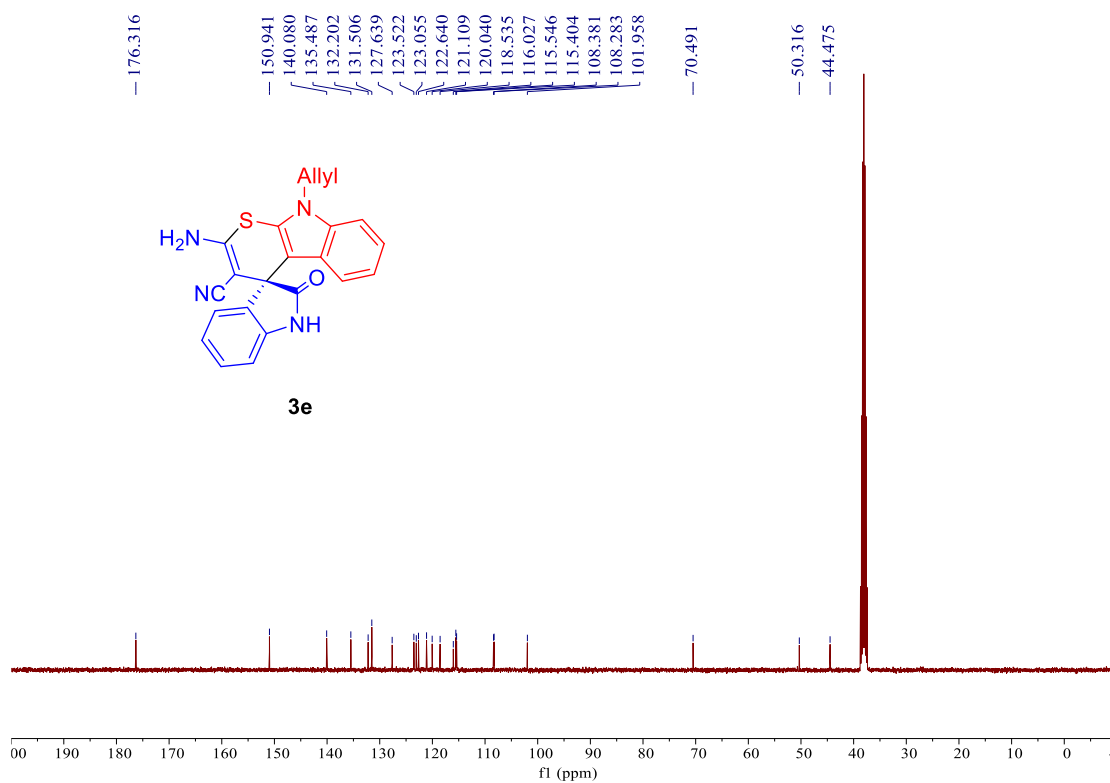

**<sup>1</sup>H NMR (400 MHz, DMSO-d<sub>6</sub>)**

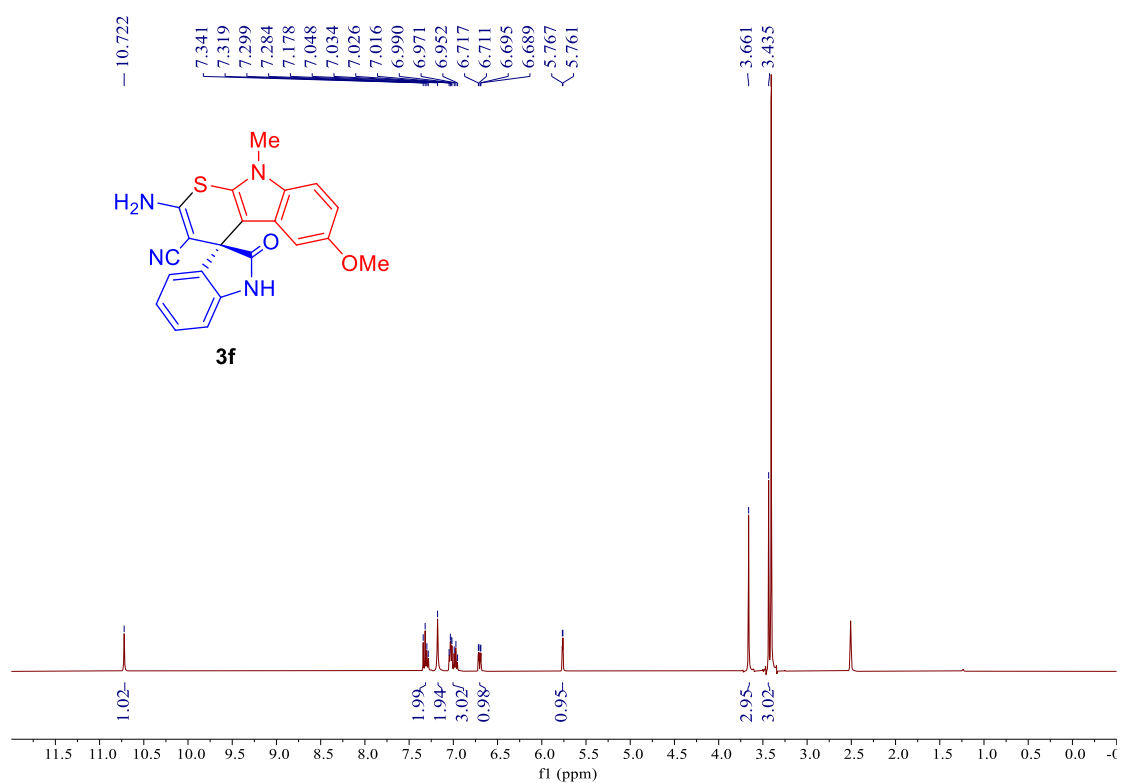

**<sup>13</sup>C NMR (101 MHz, DMSO-d<sub>6</sub>)**

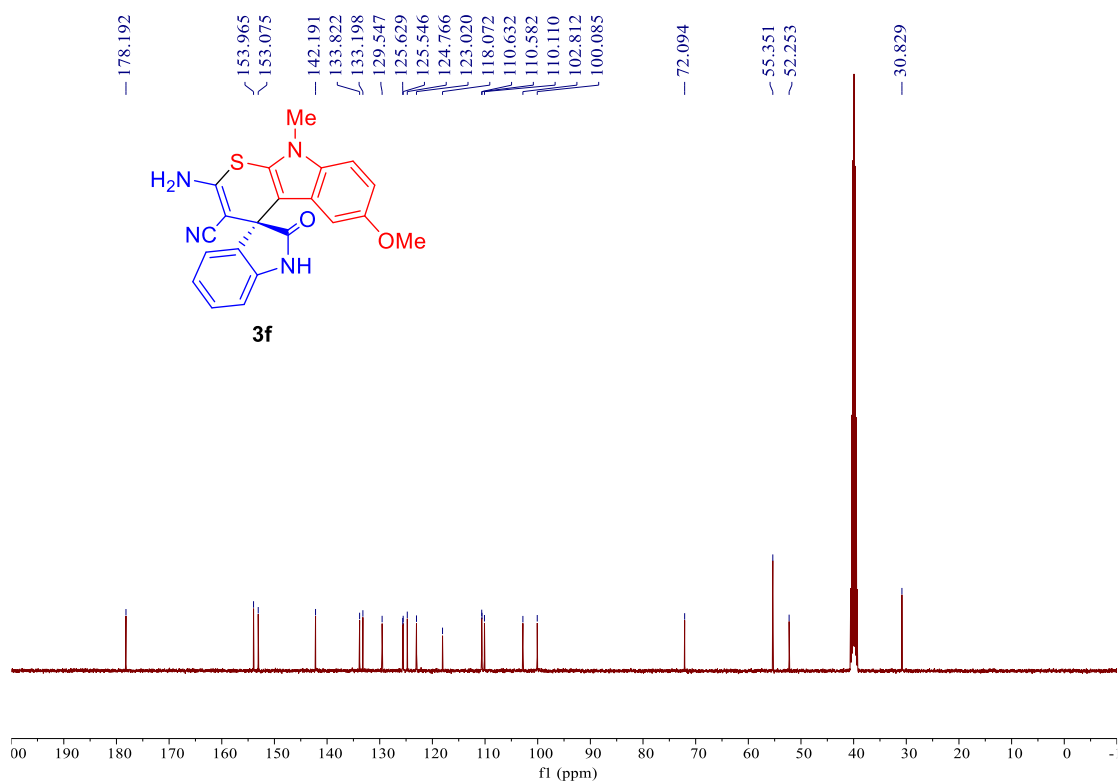

**<sup>1</sup>H NMR (400 MHz, DMSO-d<sub>6</sub>)**

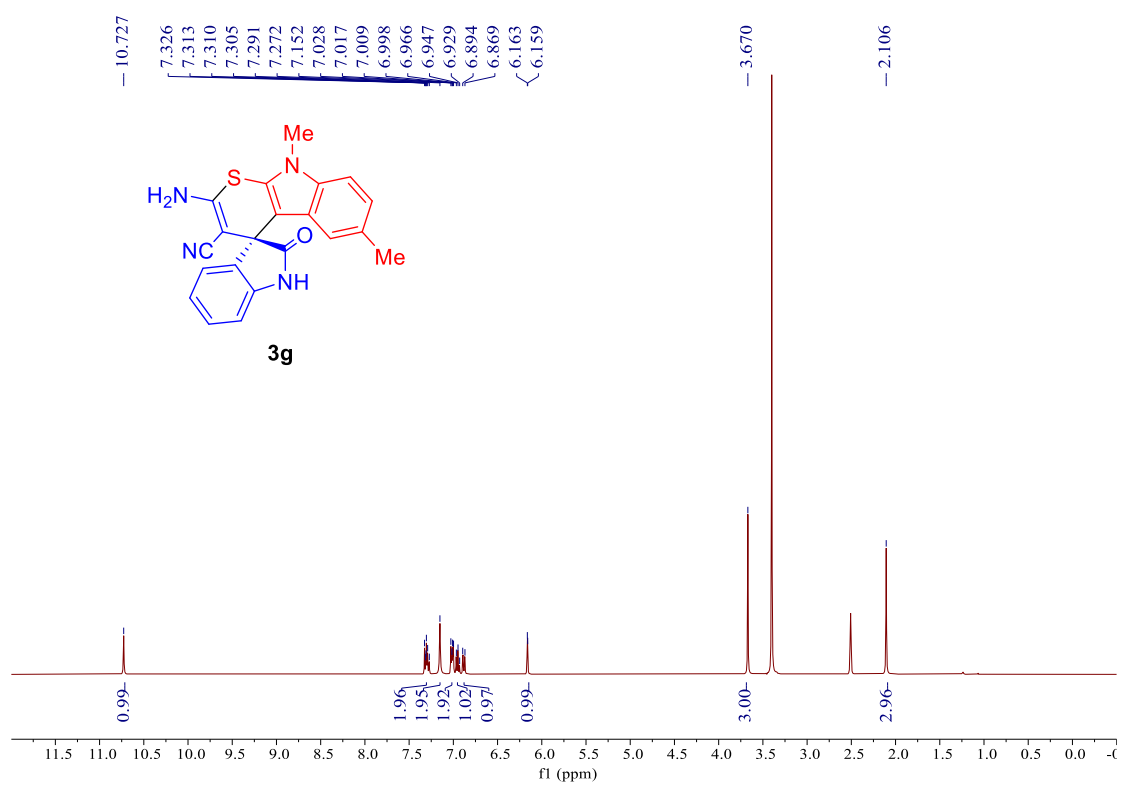

**<sup>13</sup>C NMR (101 MHz, DMSO-d<sub>6</sub>)**

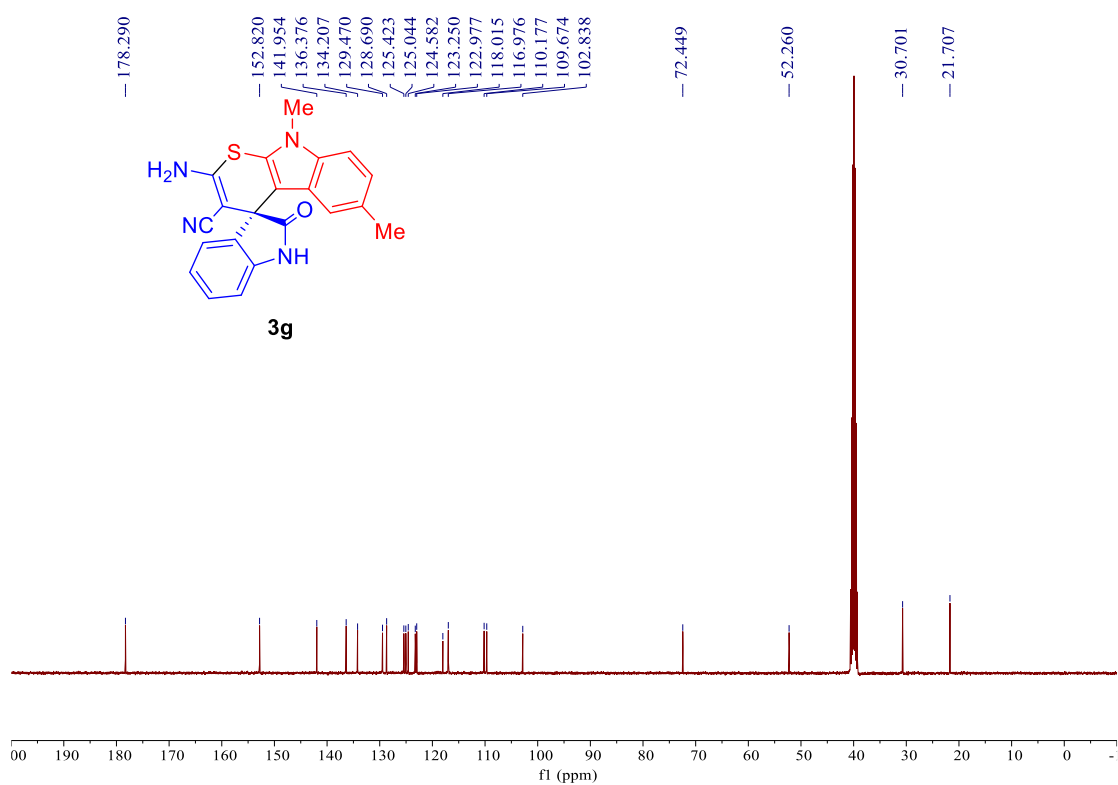



**<sup>1</sup>H NMR (400 MHz, DMSO-d<sub>6</sub>)**

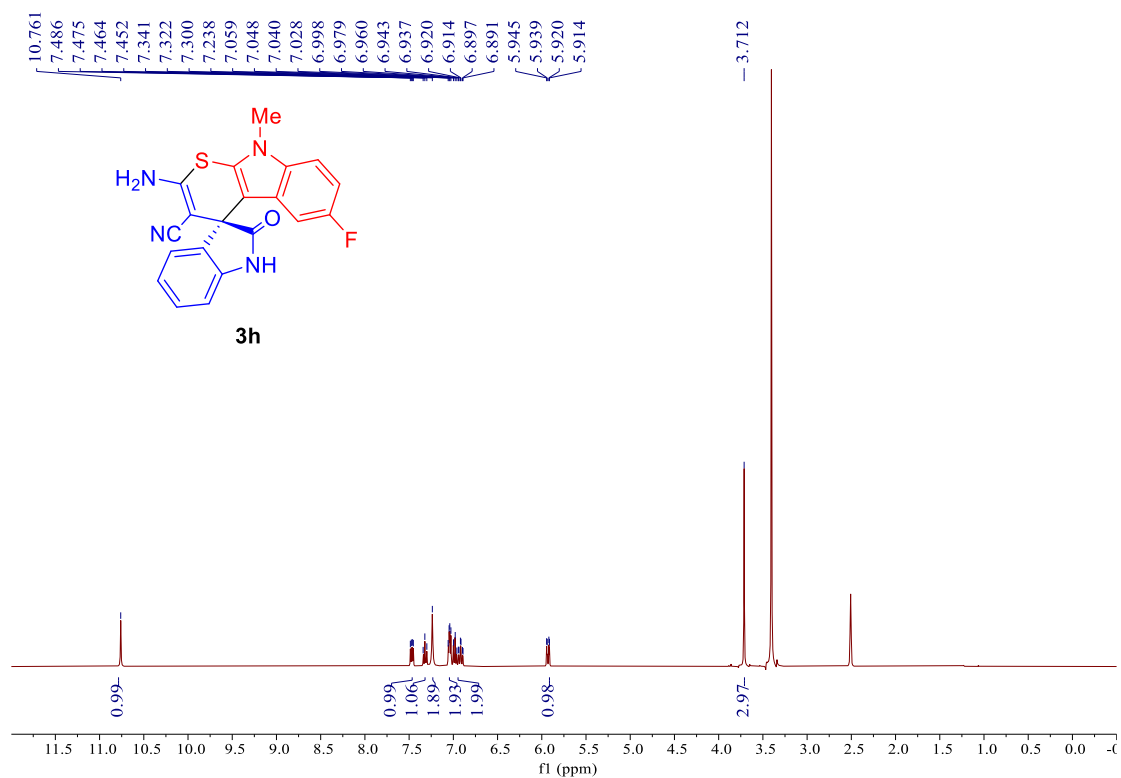

**<sup>13</sup>C NMR (101 MHz, DMSO-d<sub>6</sub>)**

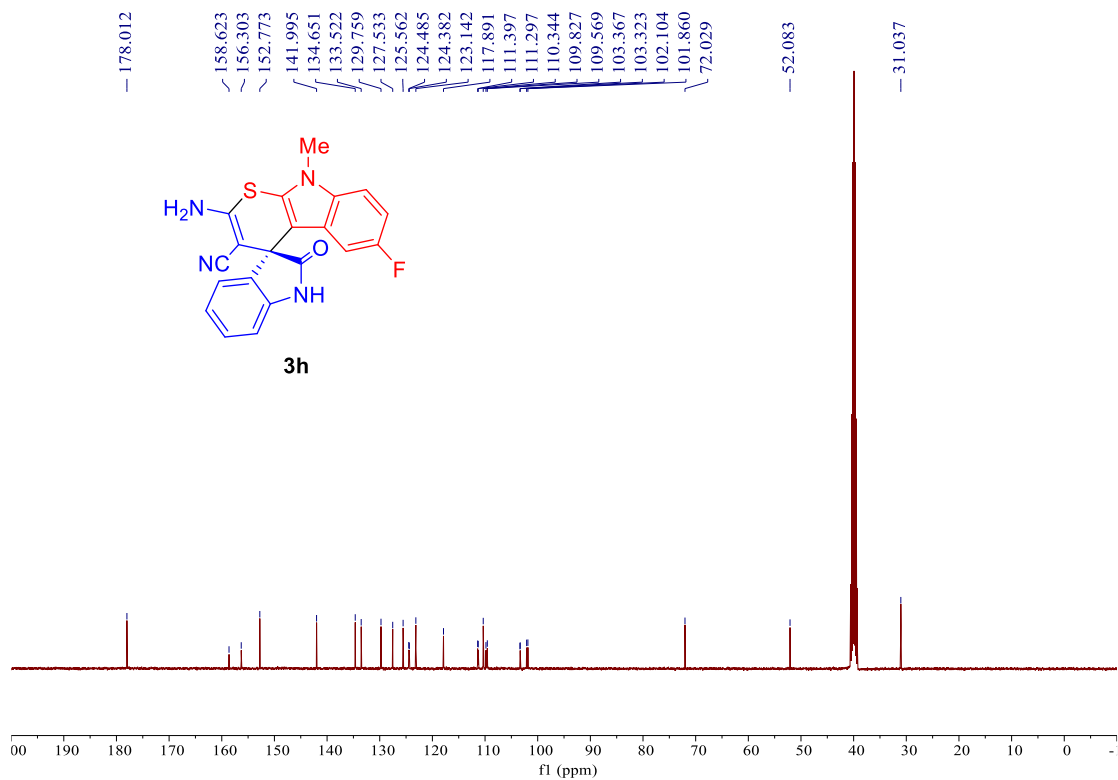

**$^{19}\text{F}$  NMR (376 MHz, DMSO- $d_6$ )**

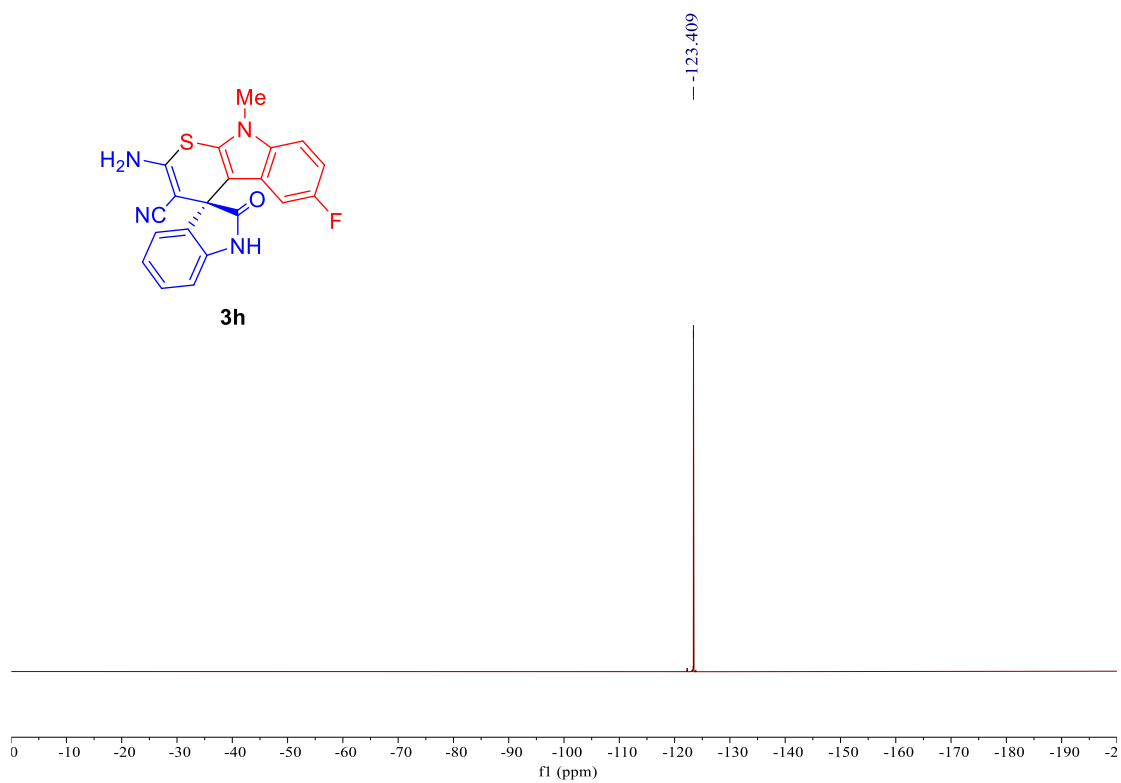

**$^1\text{H}$  NMR (400 MHz, DMSO- $d_6$ )**

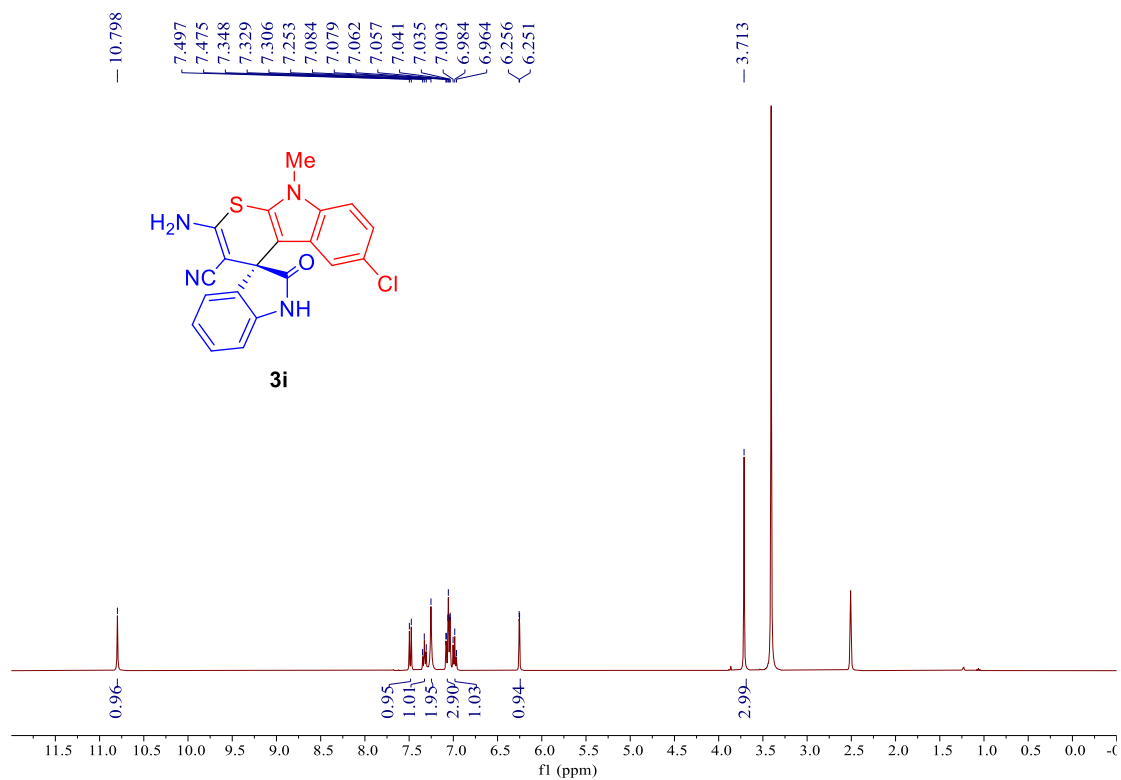

$^{13}\text{C}$  NMR (101 MHz, DMSO- $d_6$ )

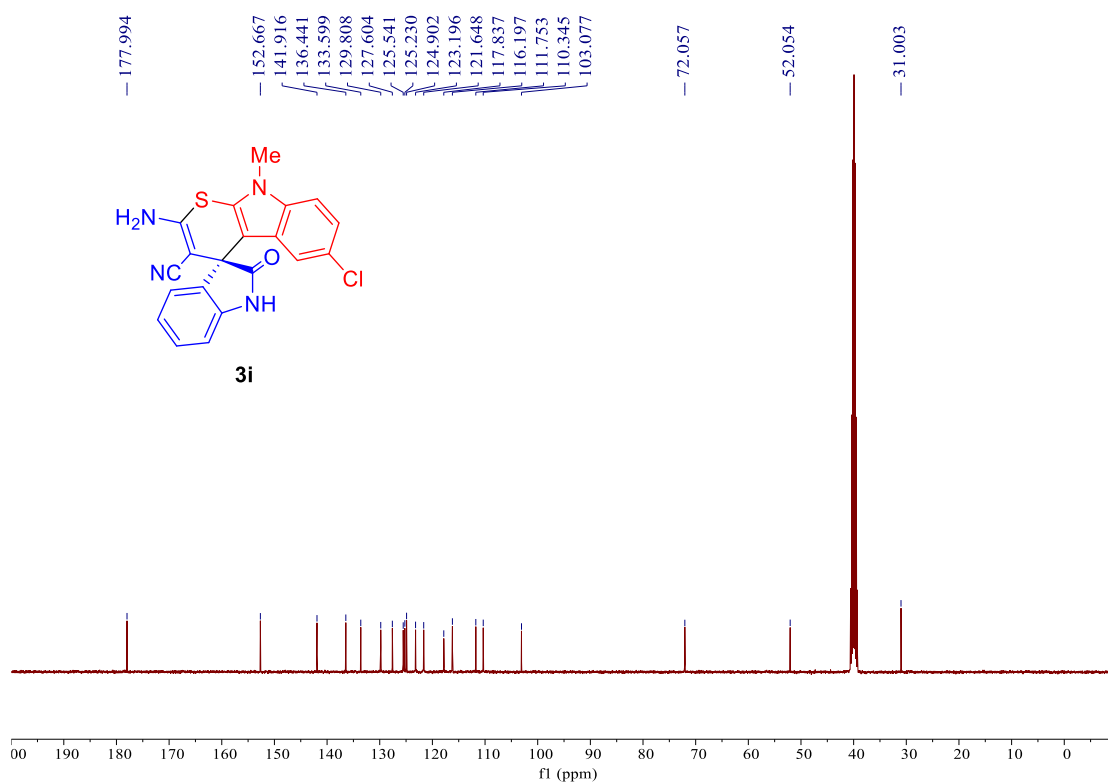

$^1\text{H}$  NMR (400 MHz, DMSO- $d_6$ )

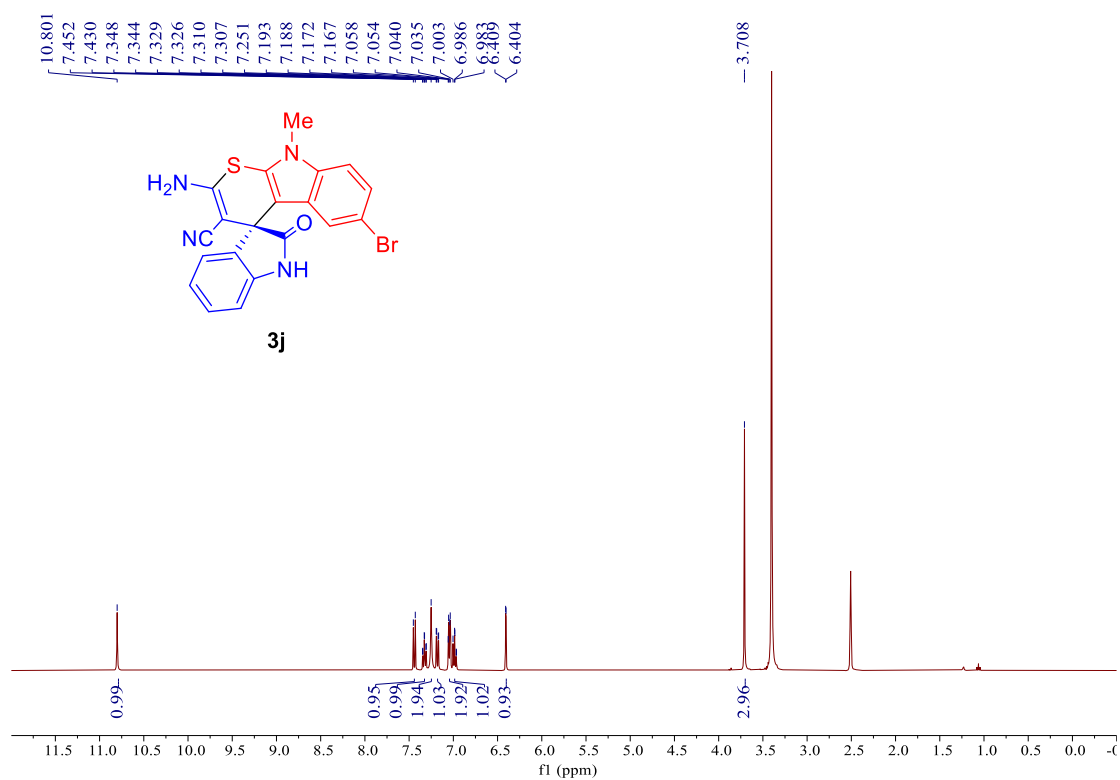

**$^{13}\text{C}$  NMR** (101 MHz,  $\text{DMSO-d}_6$ )

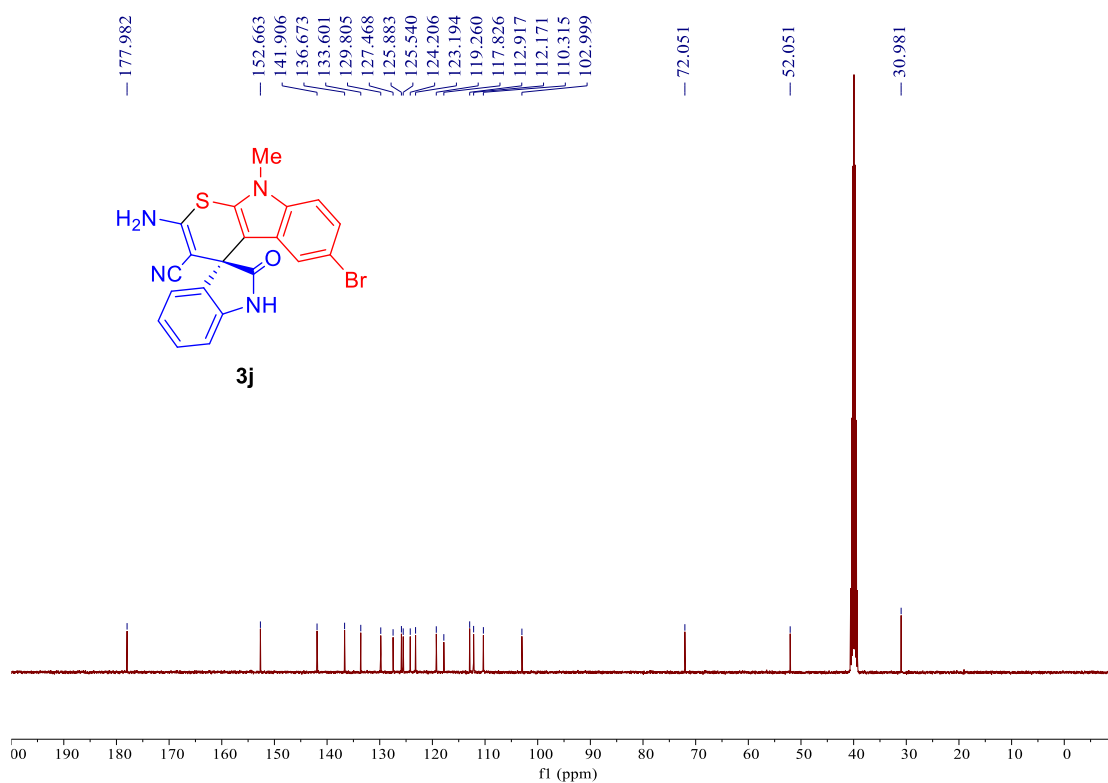

**$^1\text{H}$  NMR** (400 MHz,  $\text{DMSO-d}_6$ )

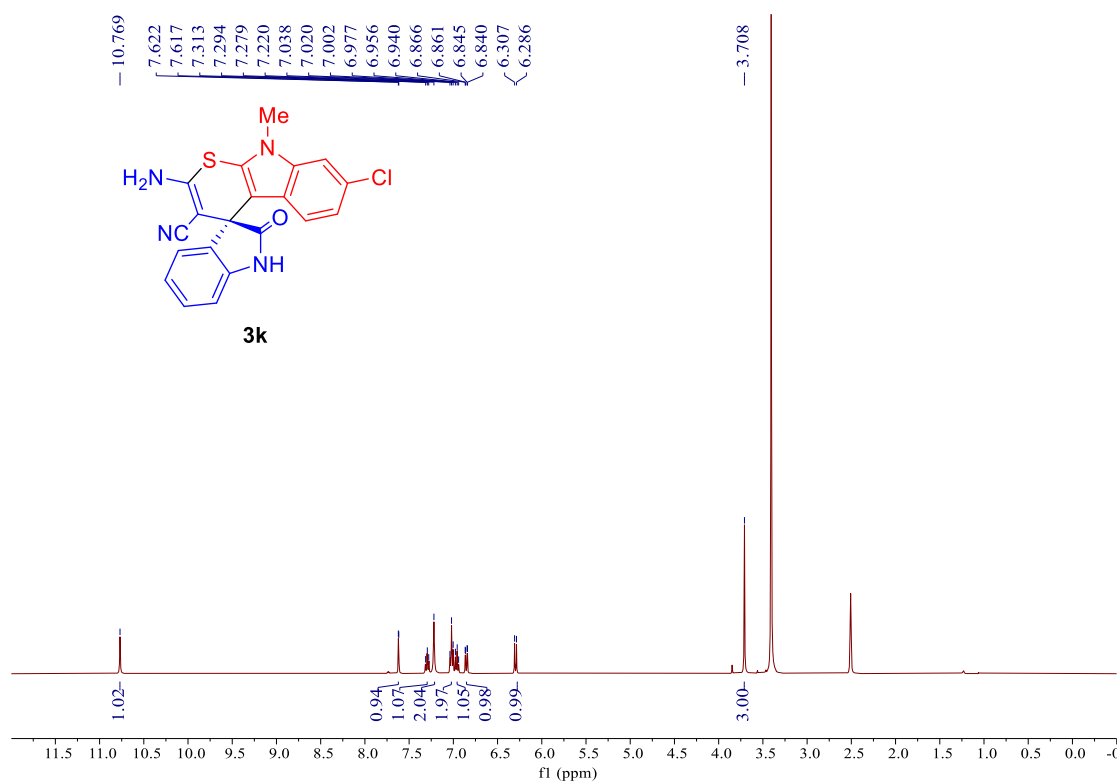

**<sup>13</sup>C NMR** (101 MHz, DMSO-d<sub>6</sub>)

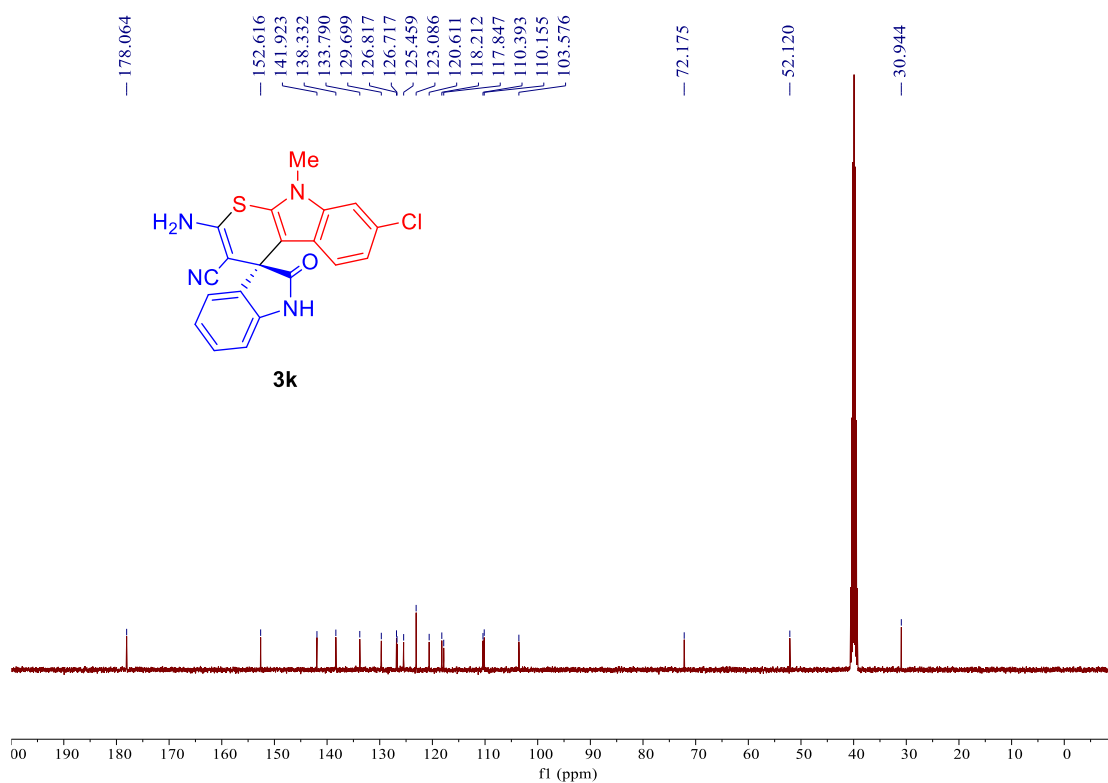

**<sup>1</sup>H NMR** (400 MHz, DMSO-d<sub>6</sub>)

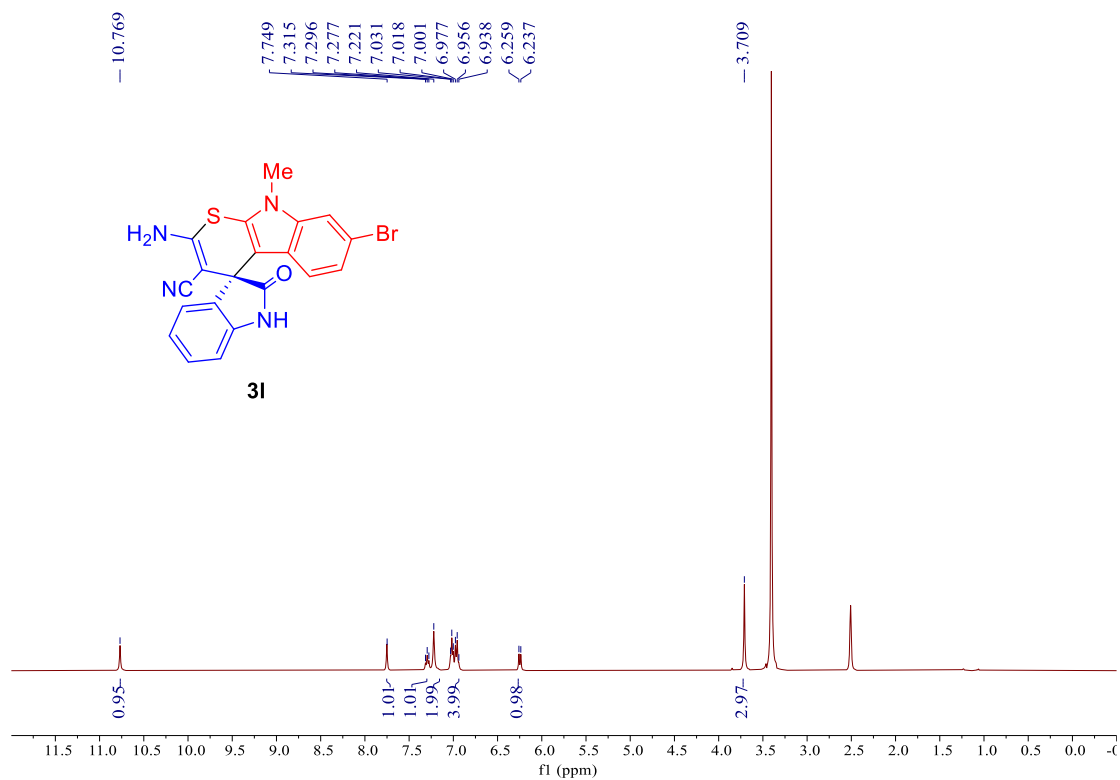

$^{13}\text{C}$  NMR (101 MHz, DMSO- $d_6$ )

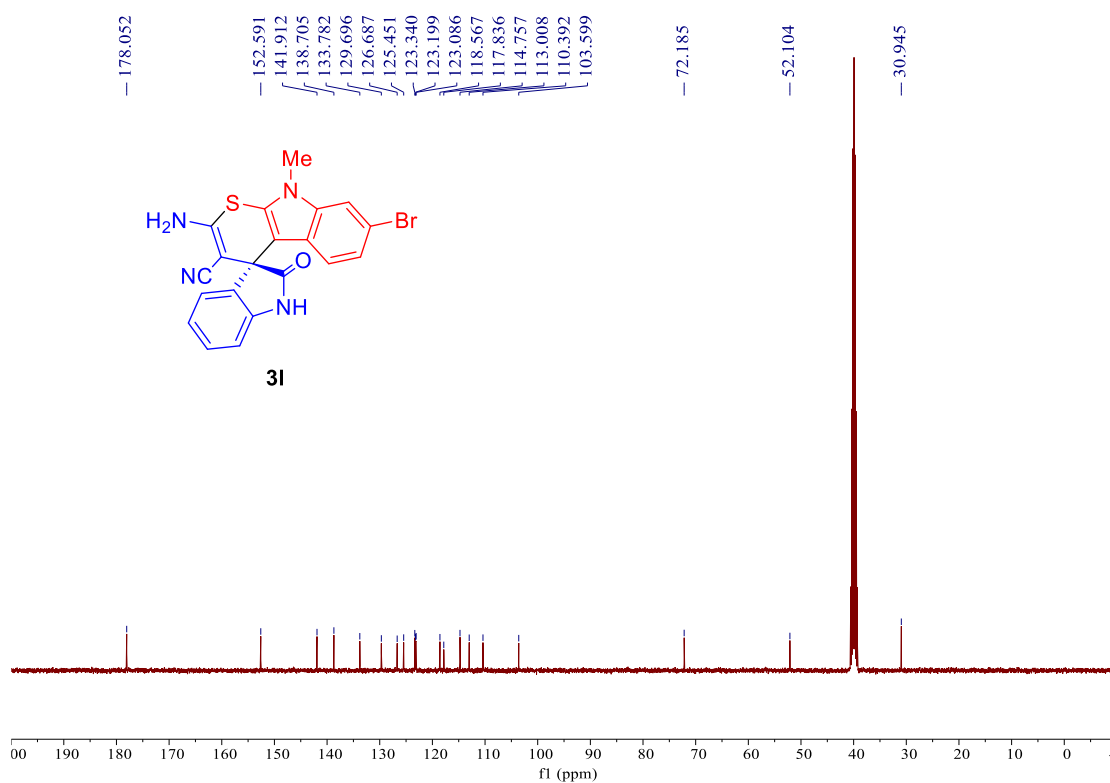

$^1\text{H}$  NMR (400 MHz, DMSO- $d_6$ )

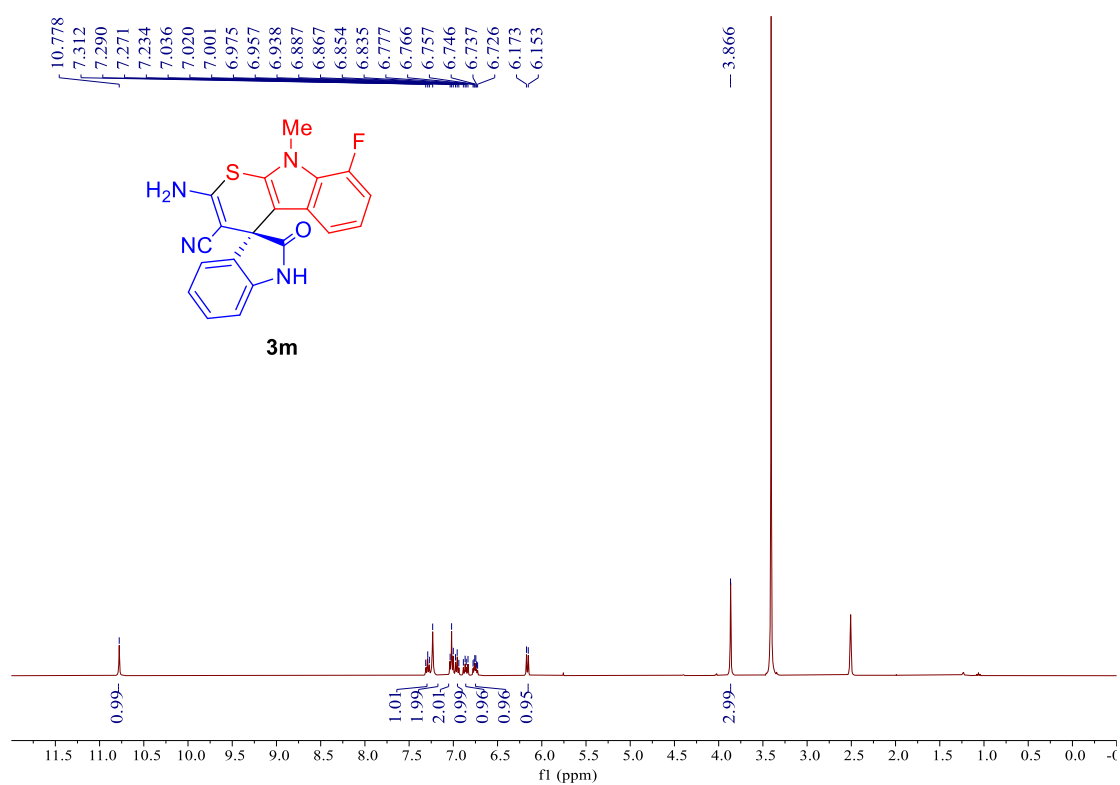

**$^{13}\text{C}$  NMR (101 MHz, DMSO- $\text{d}_6$ )**

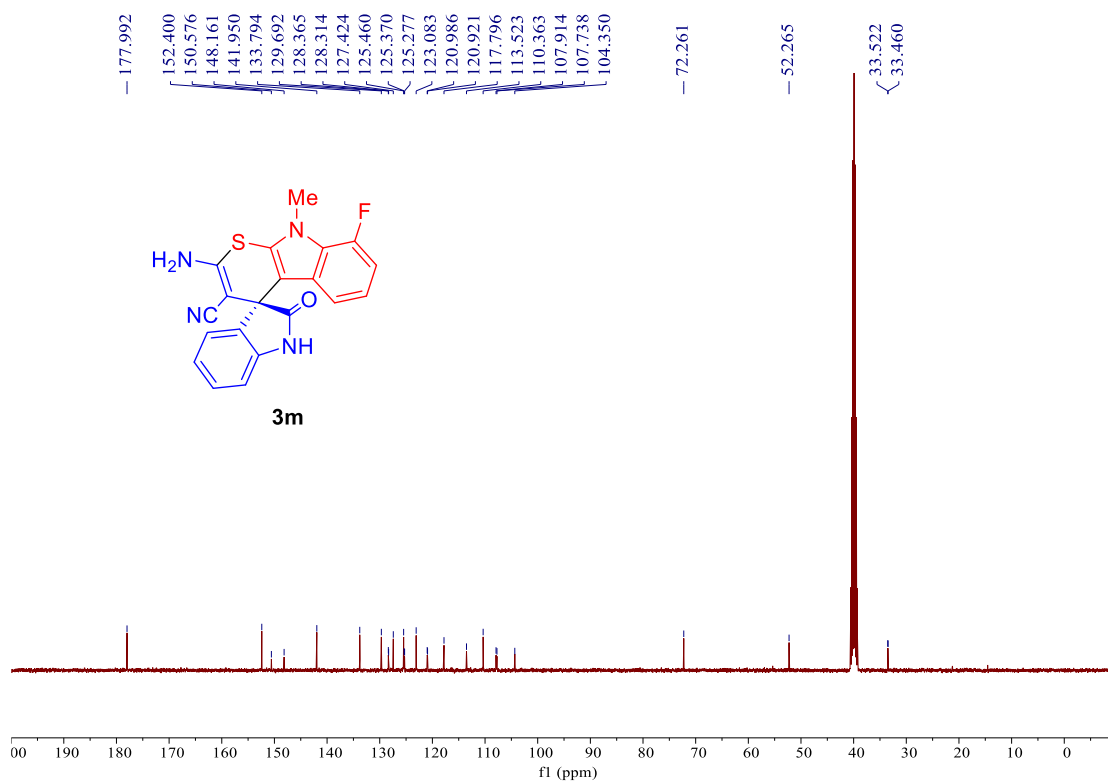

**$^{19}\text{F}$  NMR (376 MHz, DMSO- $\text{d}_6$ )**

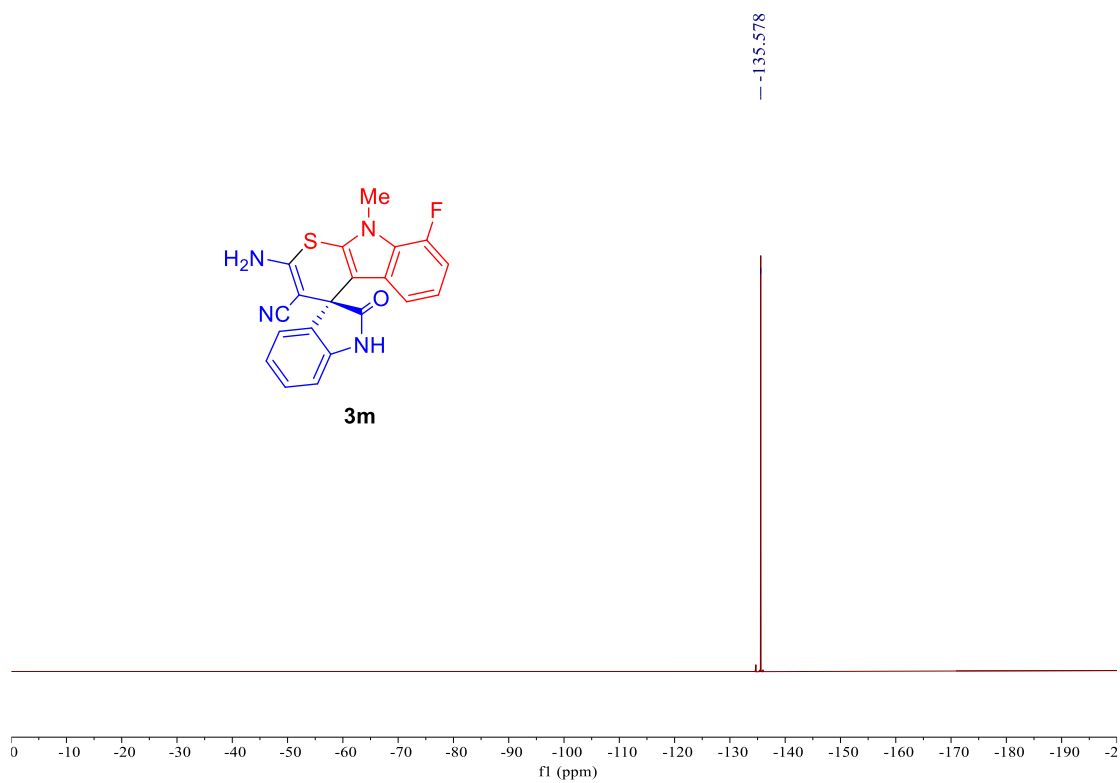

**<sup>1</sup>H NMR** (400 MHz, DMSO-d<sub>6</sub>)

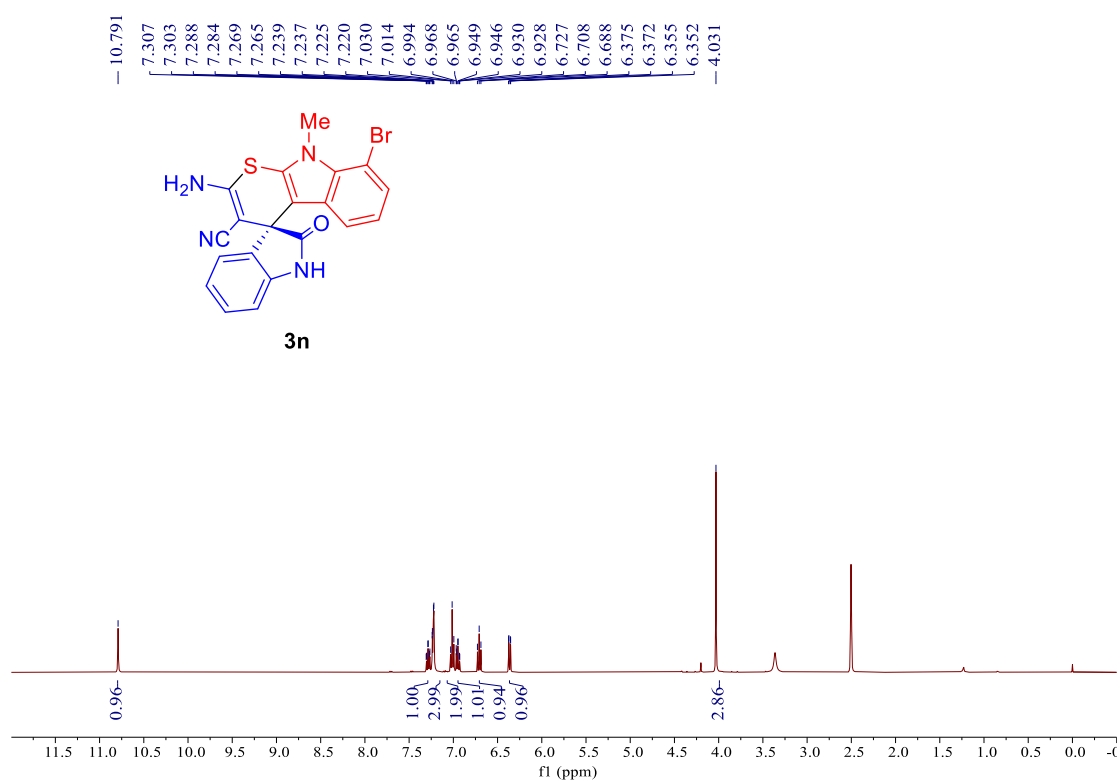

**<sup>13</sup>C NMR** (101 MHz, DMSO-d<sub>6</sub>)

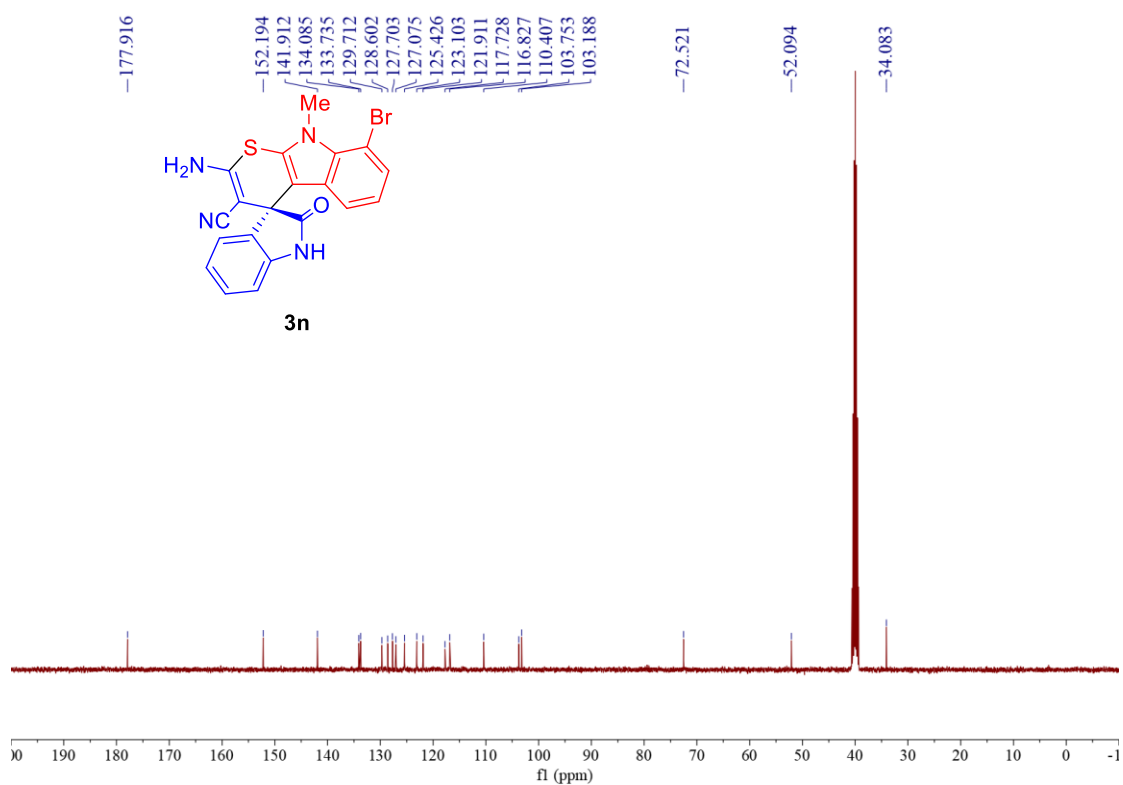



**<sup>1</sup>H NMR (400 MHz, DMSO-d<sub>6</sub>)**

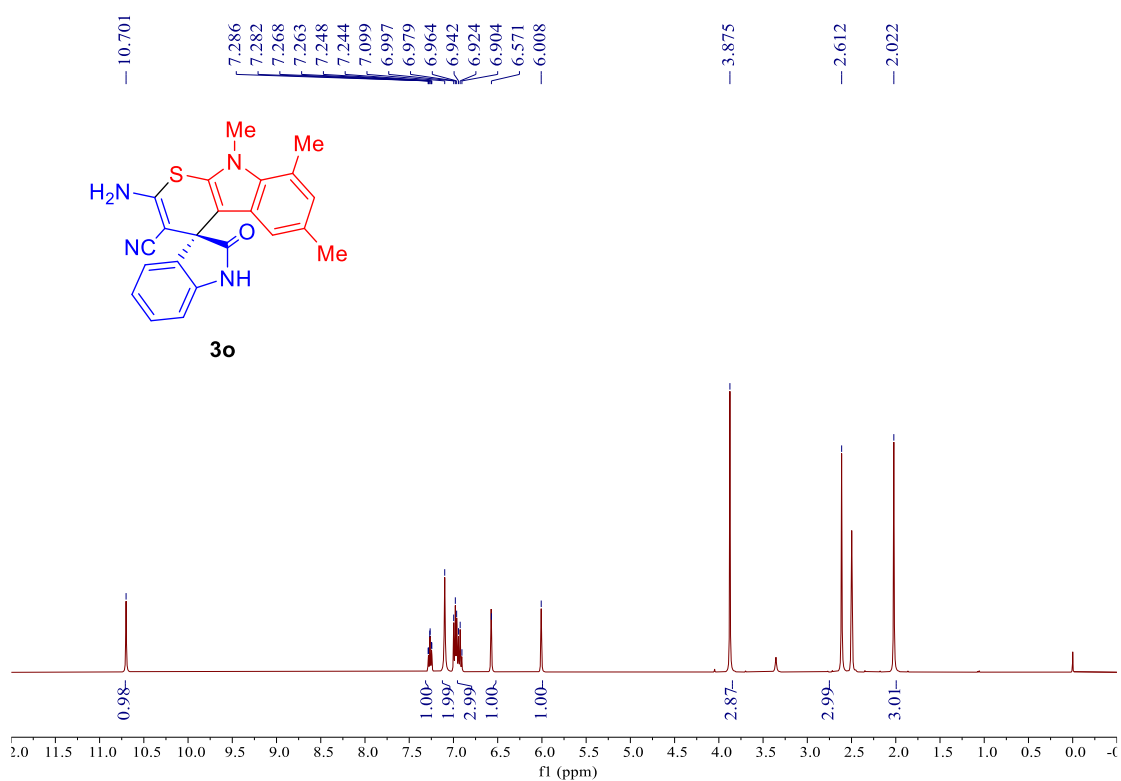

**<sup>13</sup>C NMR (101 MHz, DMSO-d<sub>6</sub>)**

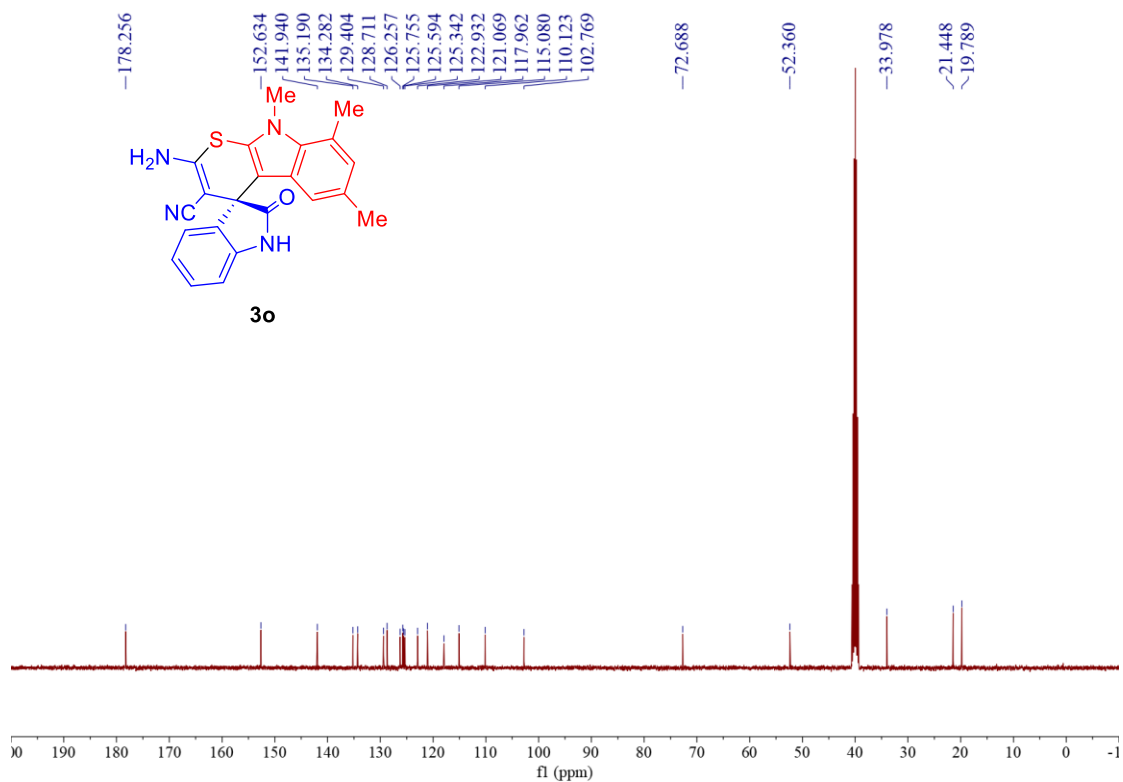

**<sup>1</sup>H NMR (400 MHz, DMSO-d<sub>6</sub>)**

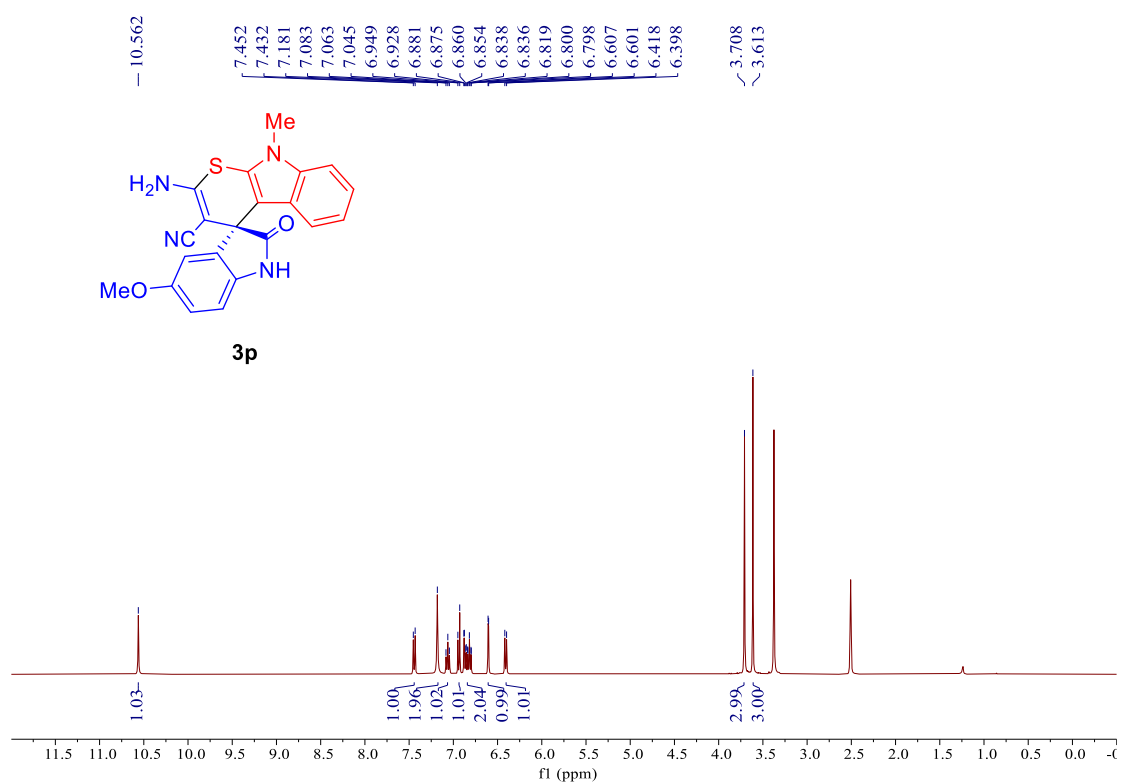

**<sup>13</sup>C NMR (101 MHz, DMSO-d<sub>6</sub>)**

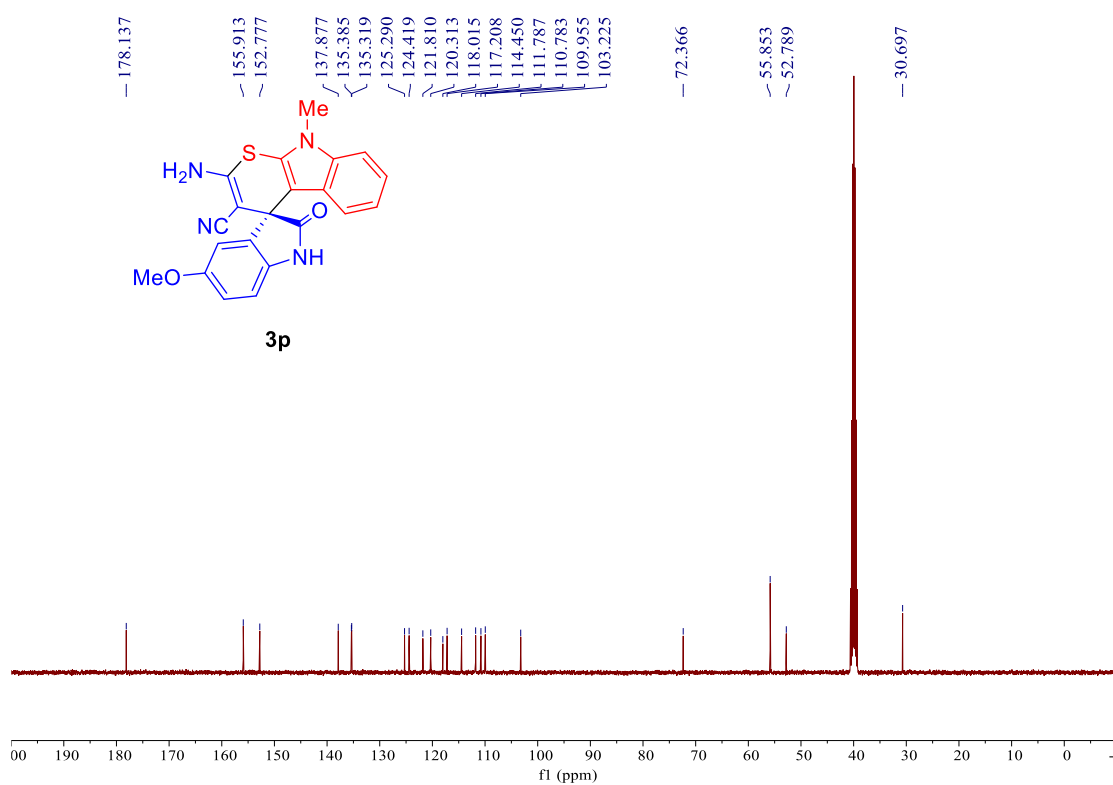

**<sup>1</sup>H NMR (400 MHz, DMSO-d<sub>6</sub>)**

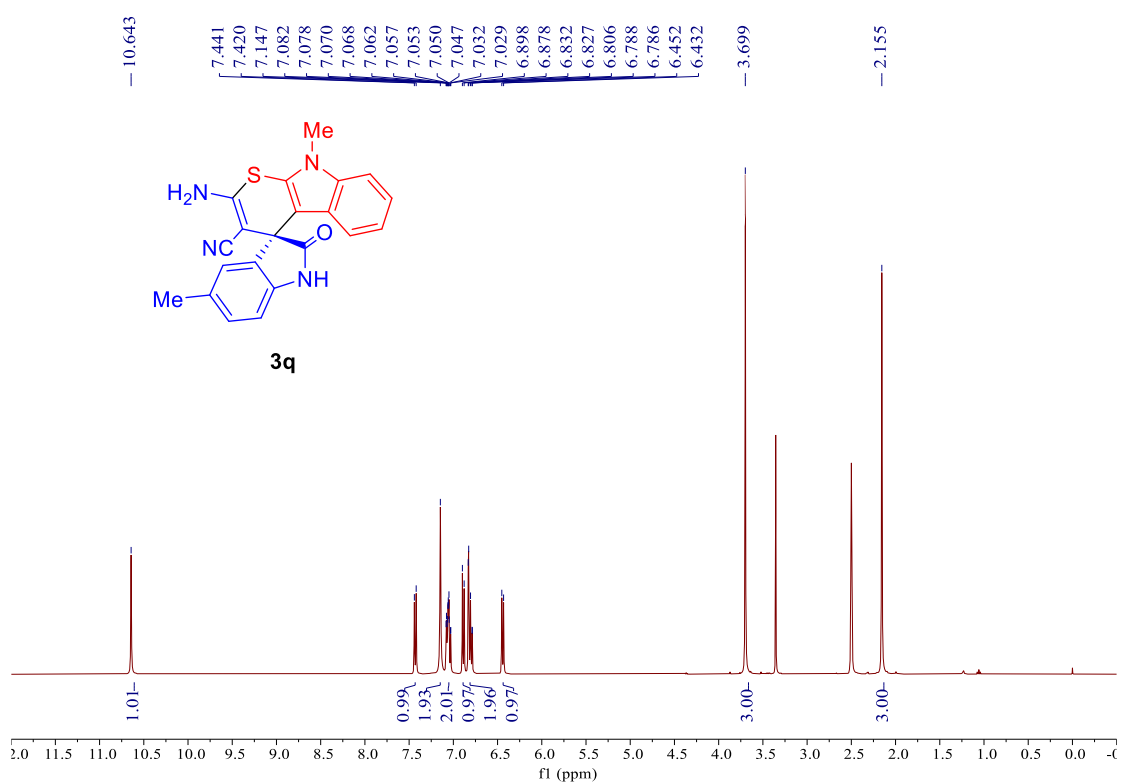

**<sup>13</sup>C NMR (101 MHz, DMSO-d<sub>6</sub>)**

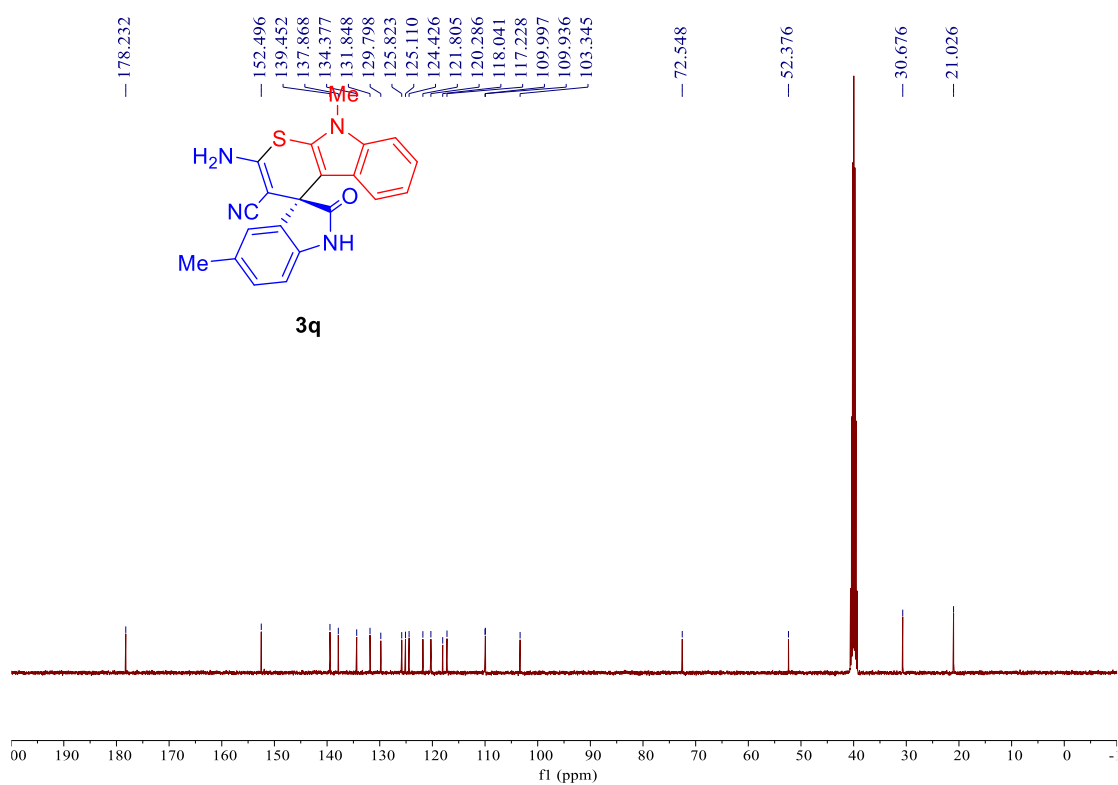

**<sup>1</sup>H NMR (400 MHz, DMSO-d<sub>6</sub>)**

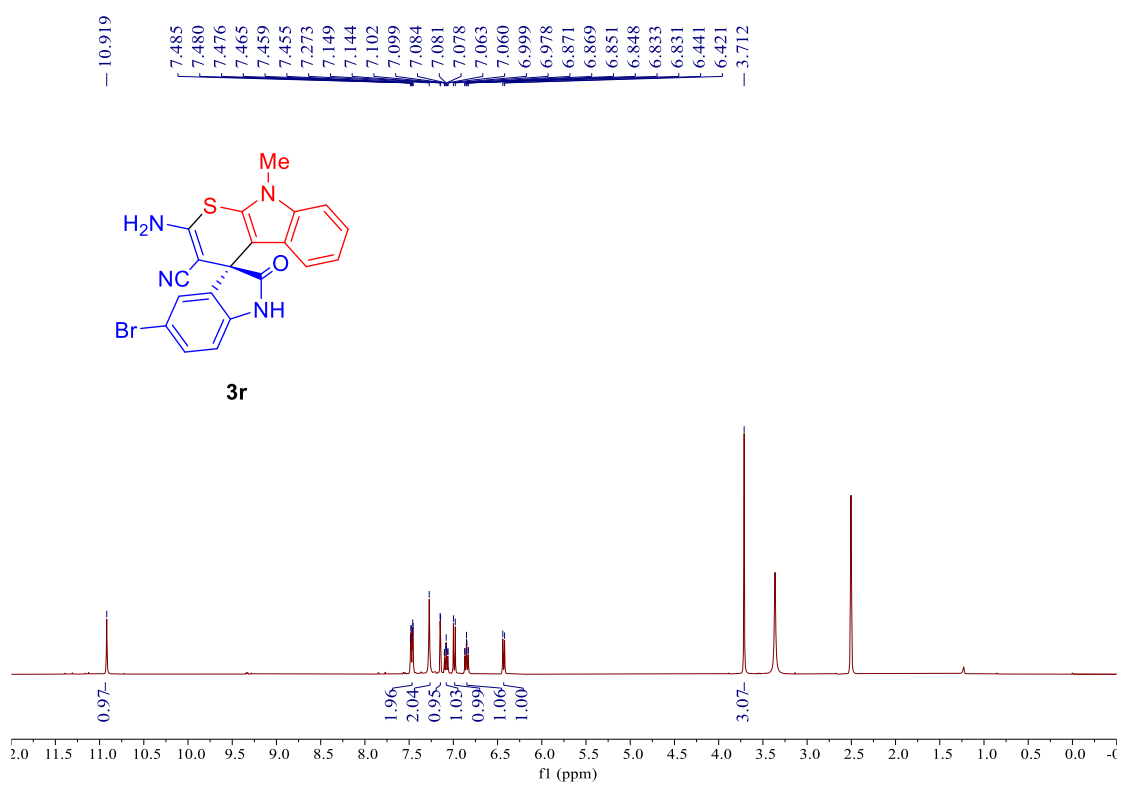

**<sup>13</sup>C NMR (101 MHz, DMSO-d<sub>6</sub>)**

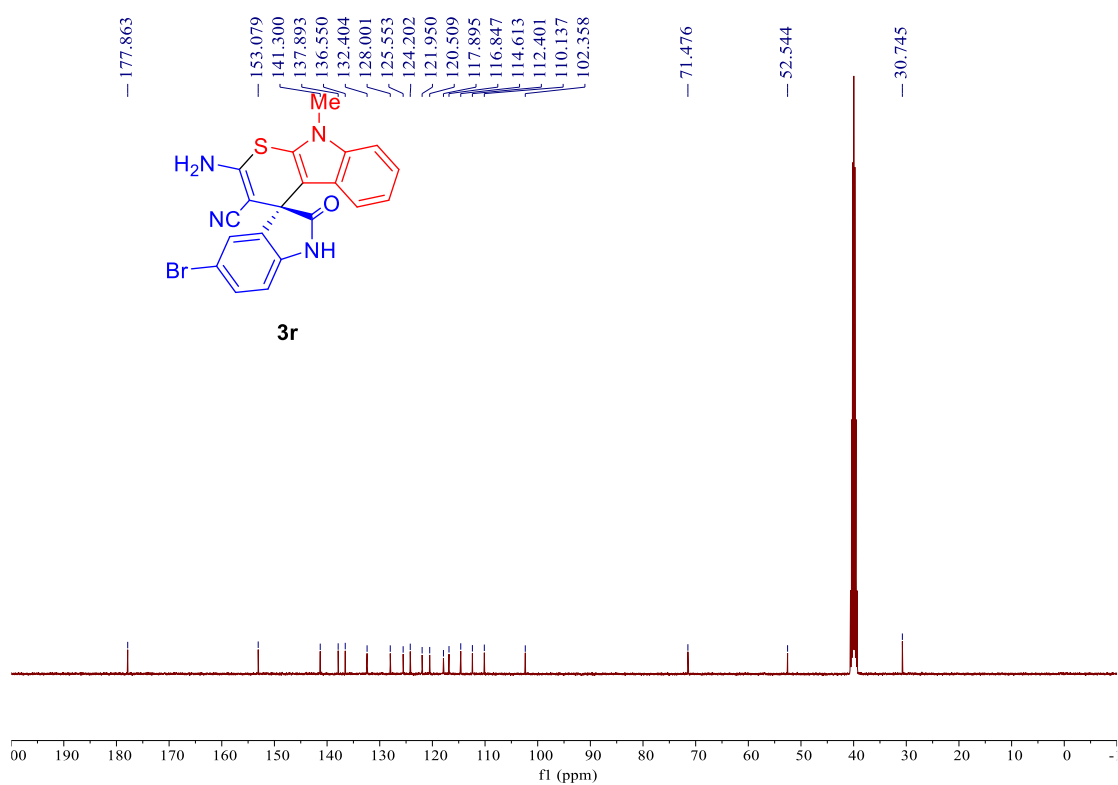

**<sup>1</sup>H NMR (400 MHz, DMSO-d<sub>6</sub>)**

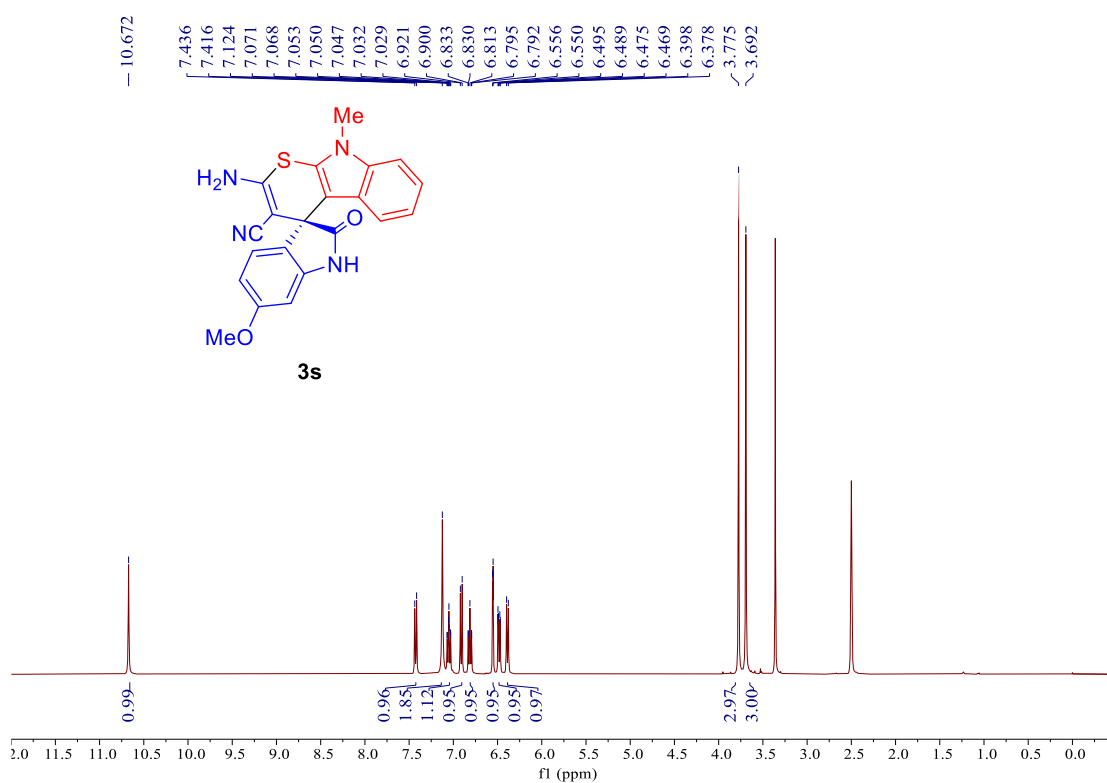

**<sup>13</sup>C NMR (101 MHz, DMSO-d<sub>6</sub>)**

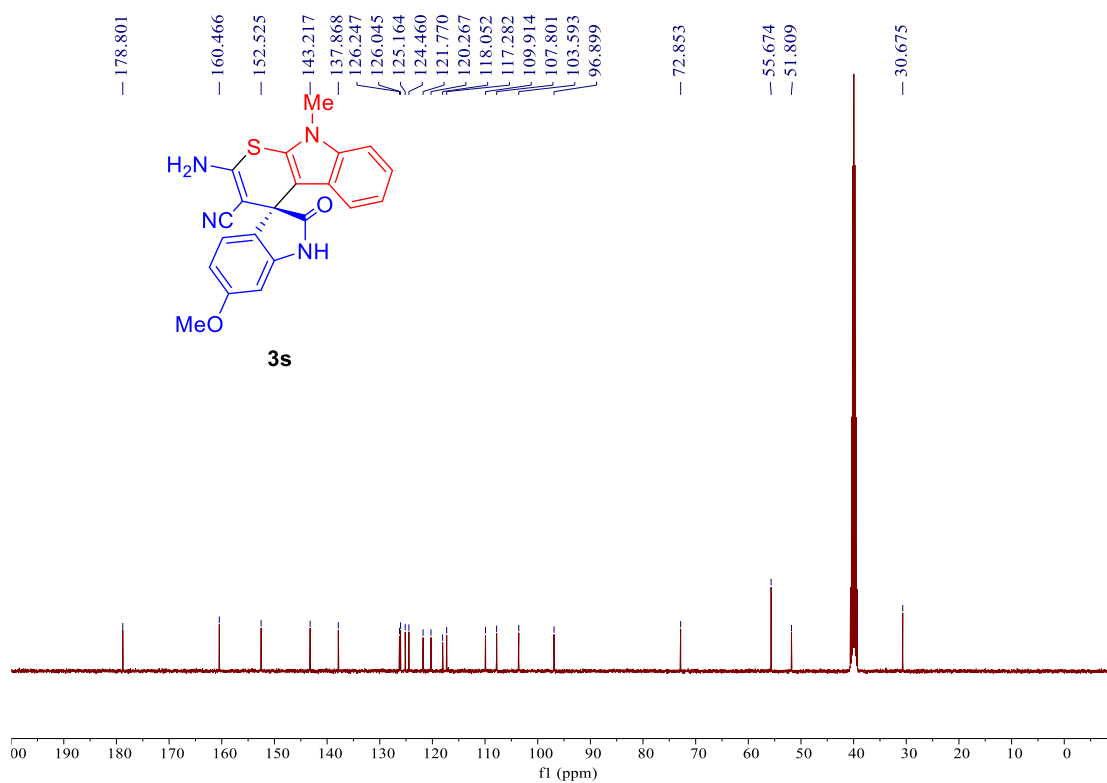

**<sup>1</sup>H NMR (400 MHz, DMSO-d<sub>6</sub>)**

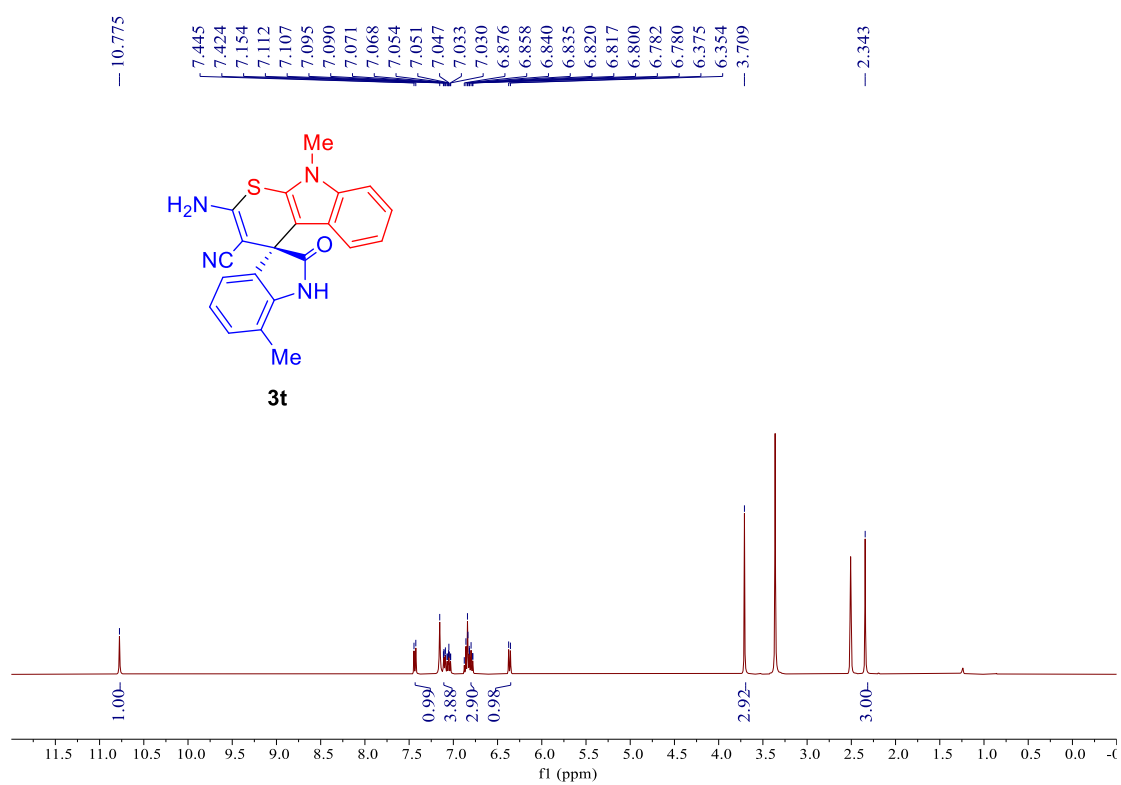

**<sup>13</sup>C NMR (101 MHz, DMSO-d<sub>6</sub>)**

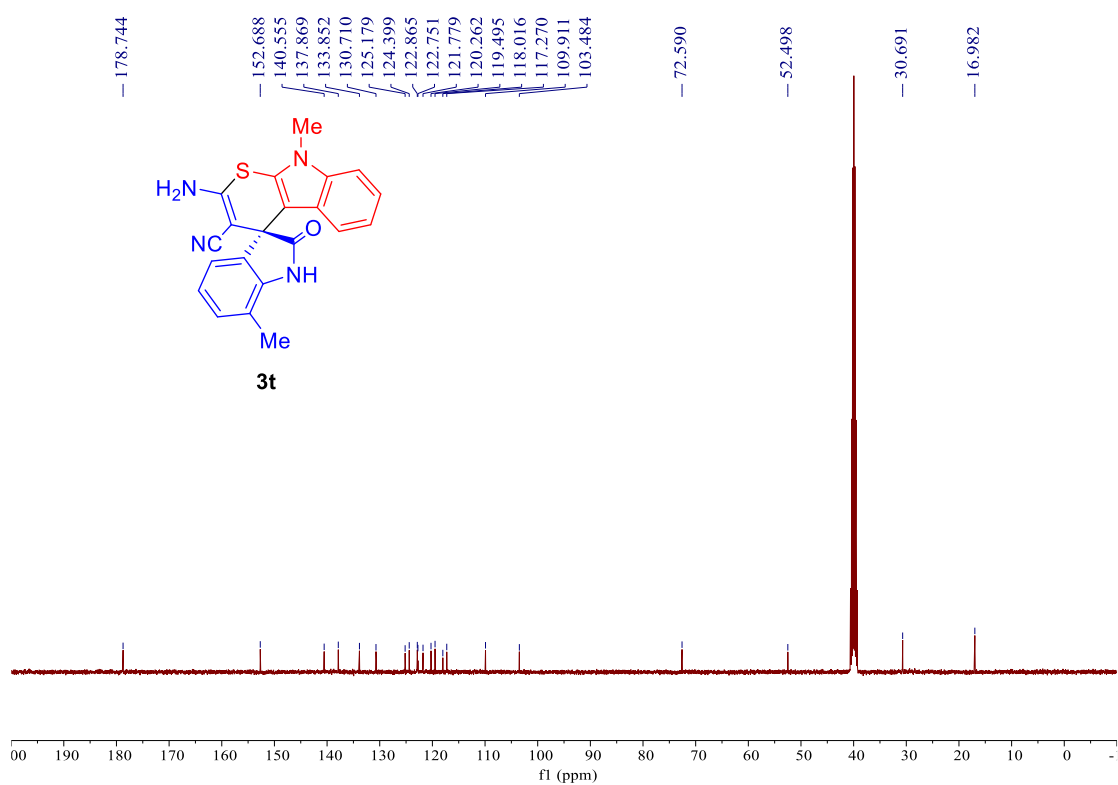

**<sup>1</sup>H NMR (400 MHz, DMSO-d<sub>6</sub>)**

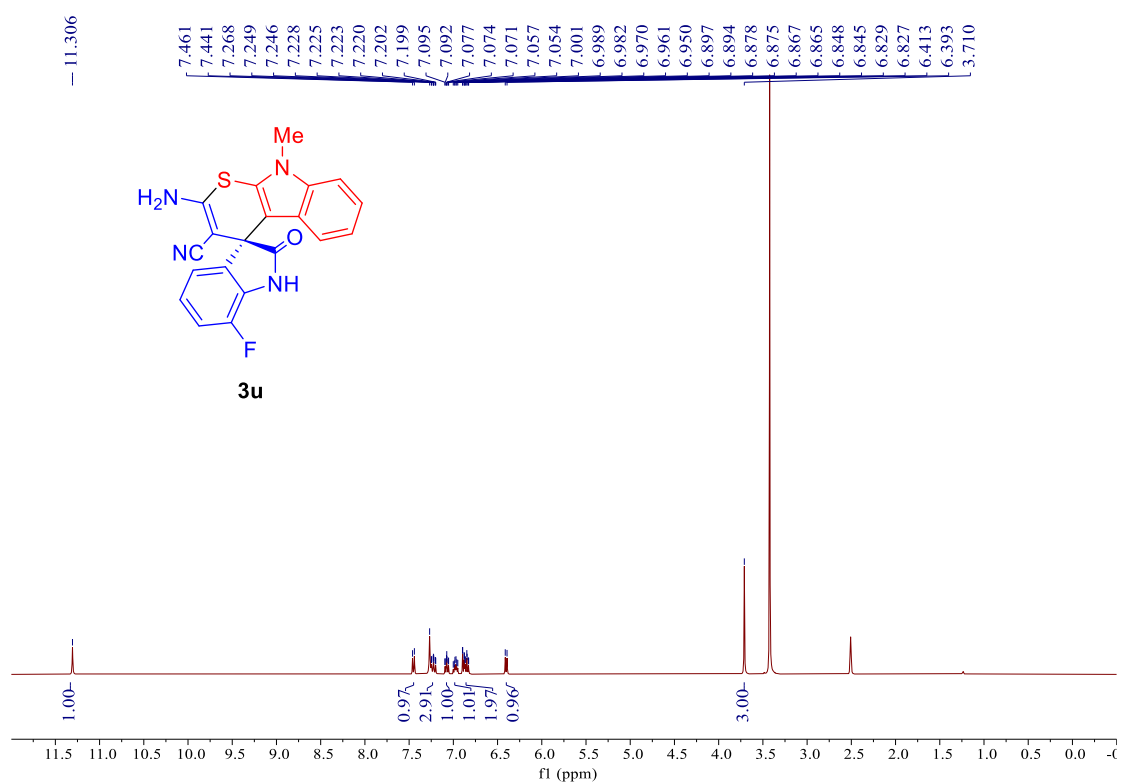

**<sup>13</sup>C NMR (101 MHz, DMSO-d<sub>6</sub>)**

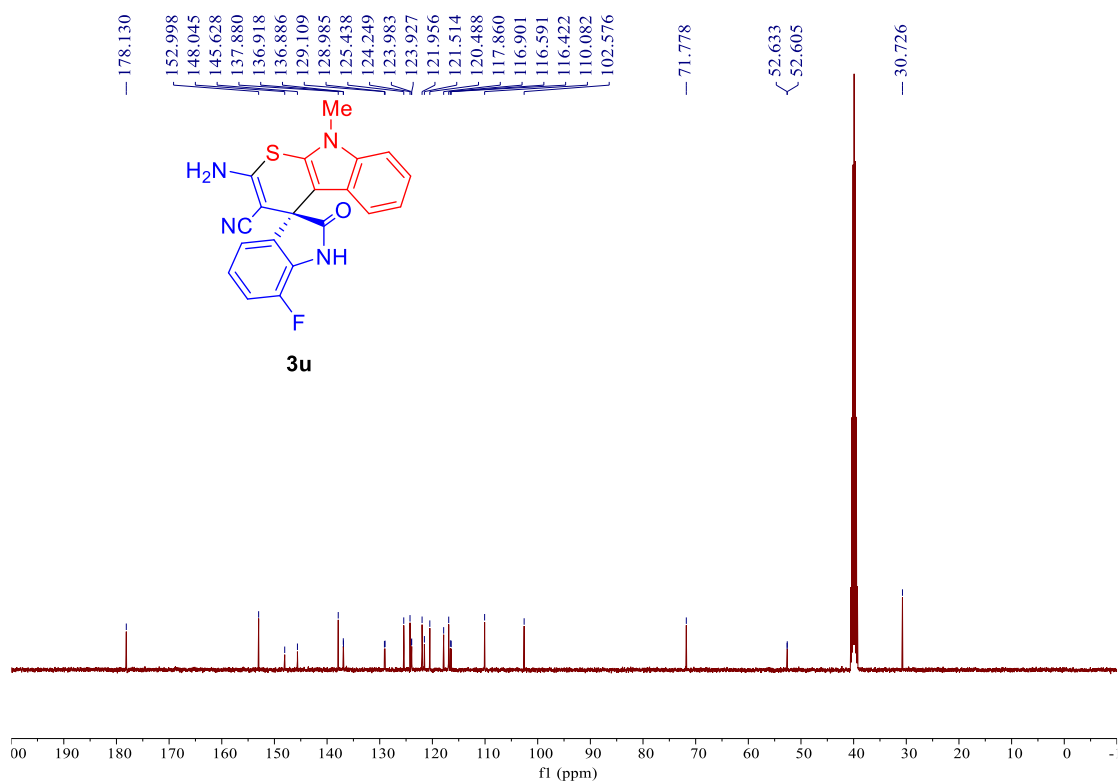

**$^{19}\text{F}$  NMR (376 MHz, DMSO- $\text{d}_6$ )**

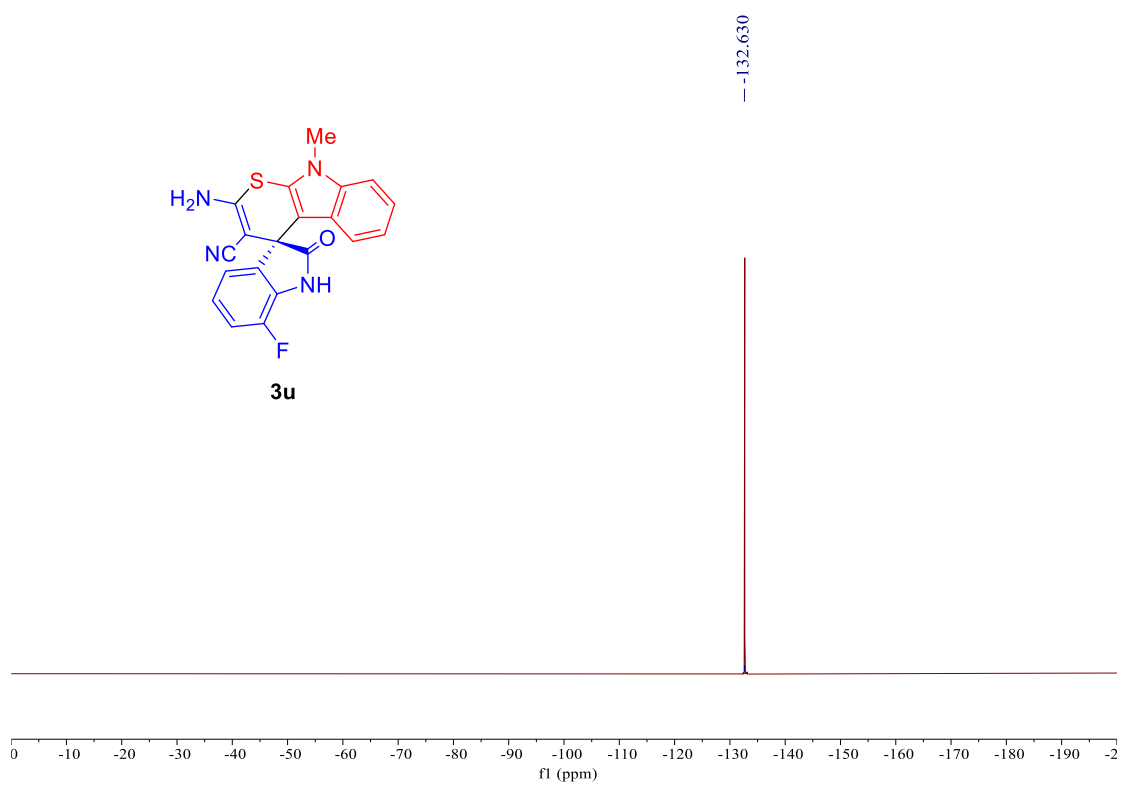

**$^1\text{H}$  NMR (400 MHz, DMSO- $\text{d}_6$ )**

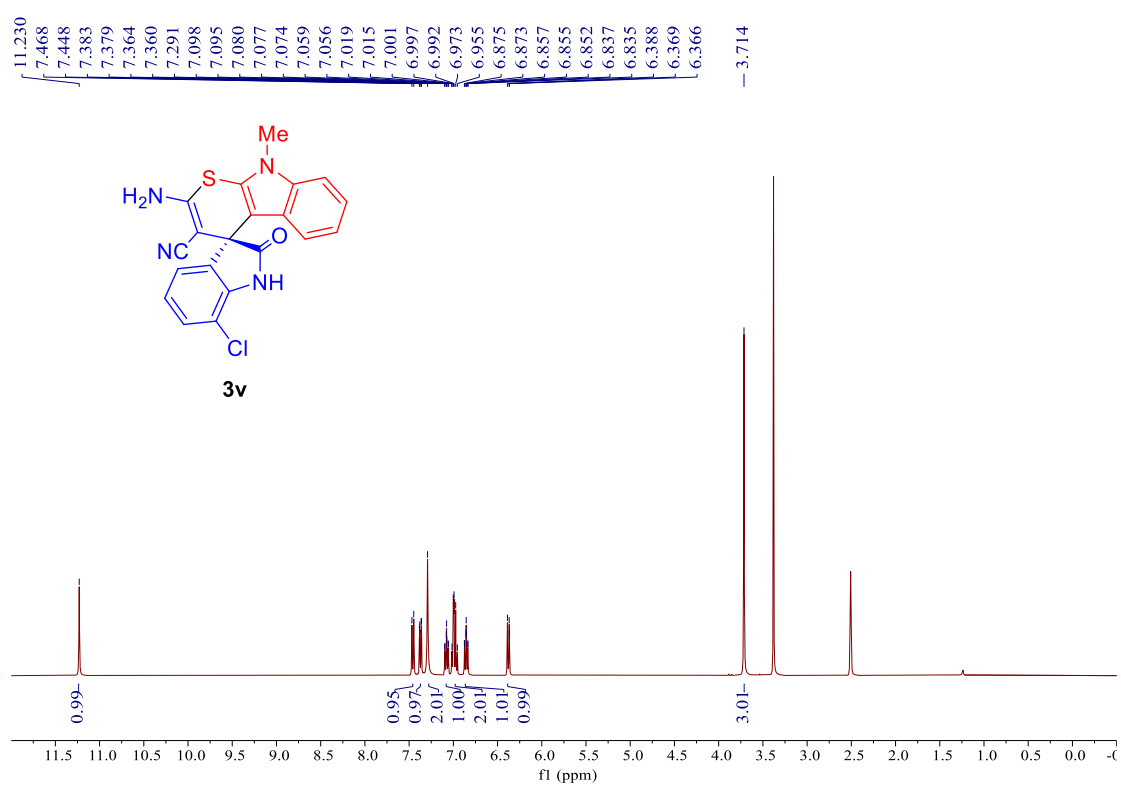



$^{13}\text{C}$  NMR (101 MHz, DMSO- $d_6$ )

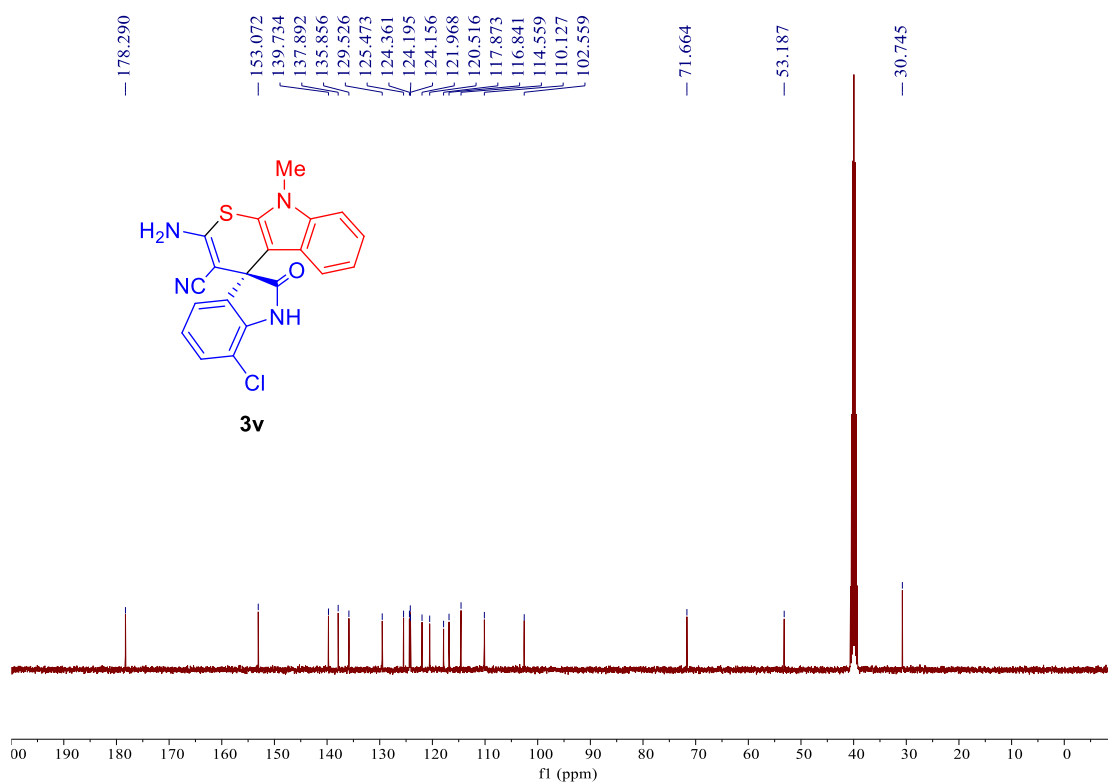

$^1\text{H}$  NMR (400 MHz, DMSO- $d_6$ )

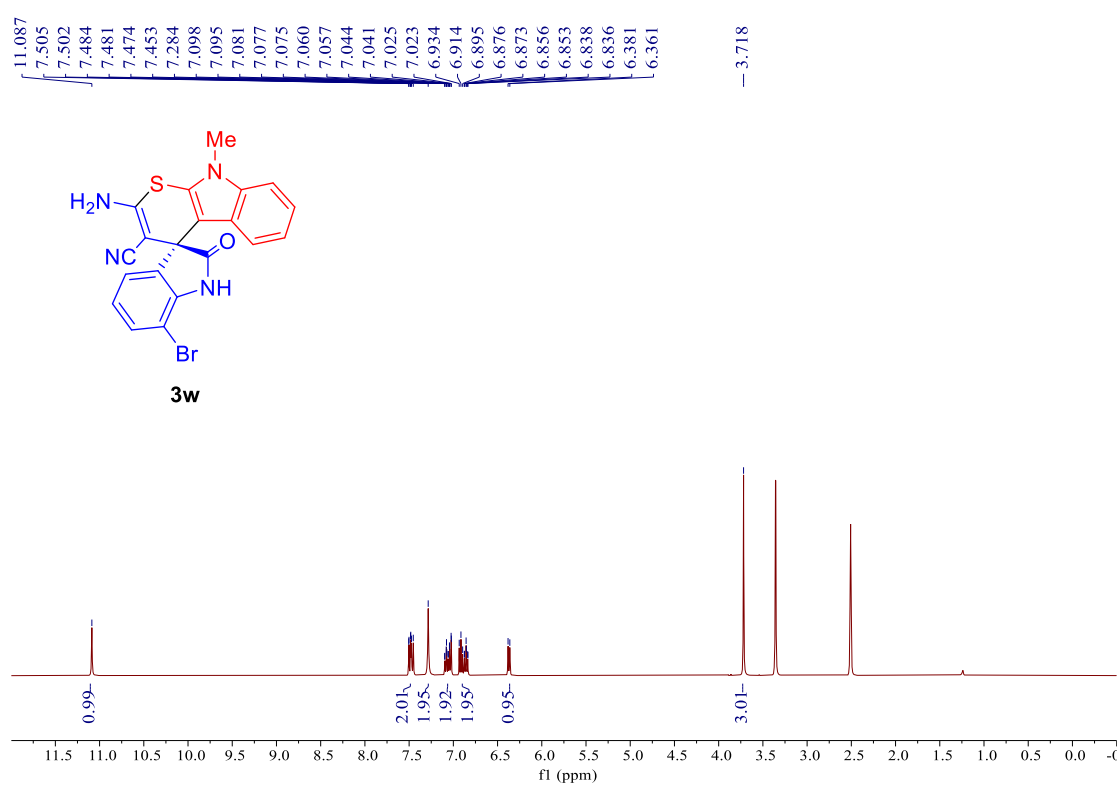

**$^{13}\text{C}$  NMR (101 MHz, DMSO- $d_6$ )**

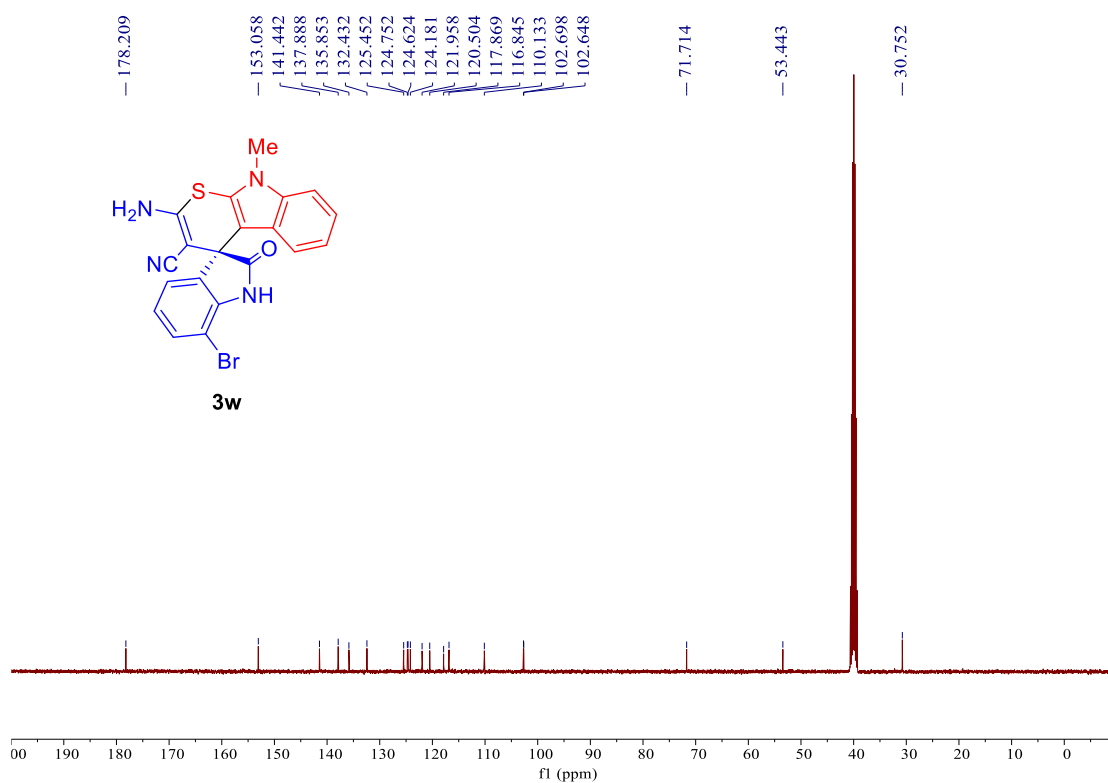

**$^1\text{H}$  NMR (400 MHz, DMSO- $d_6$ )**

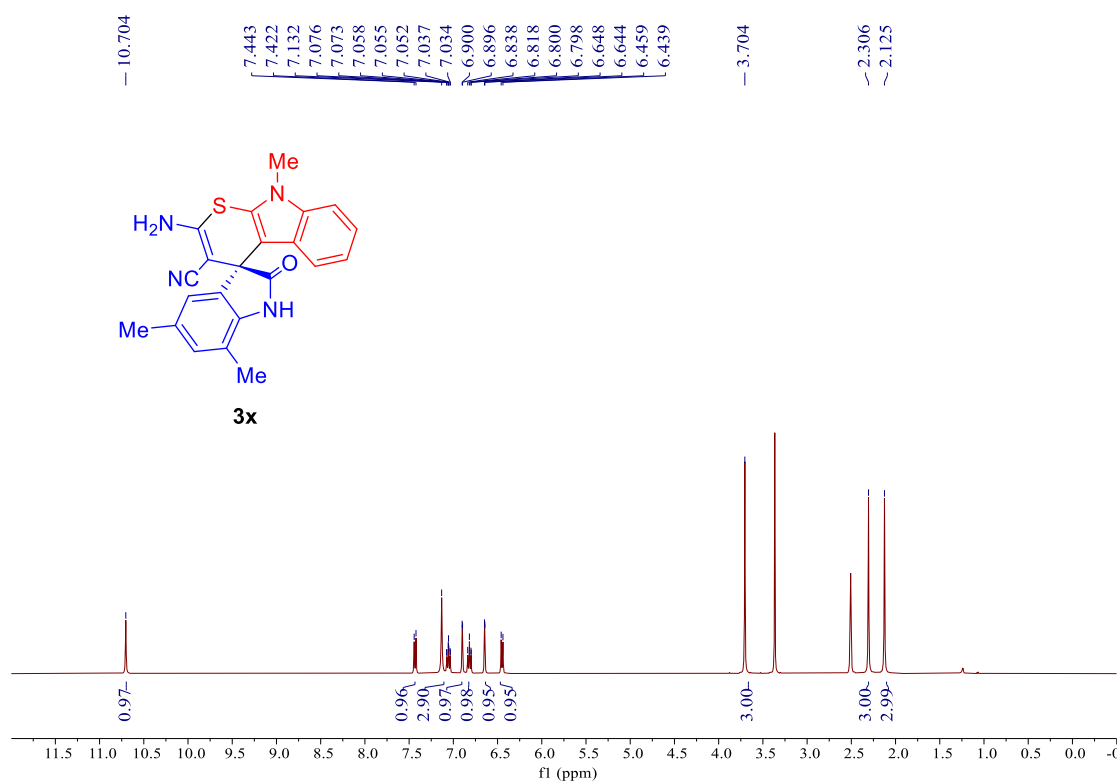

<sup>13</sup>C NMR (101 MHz, DMSO-d<sub>6</sub>)

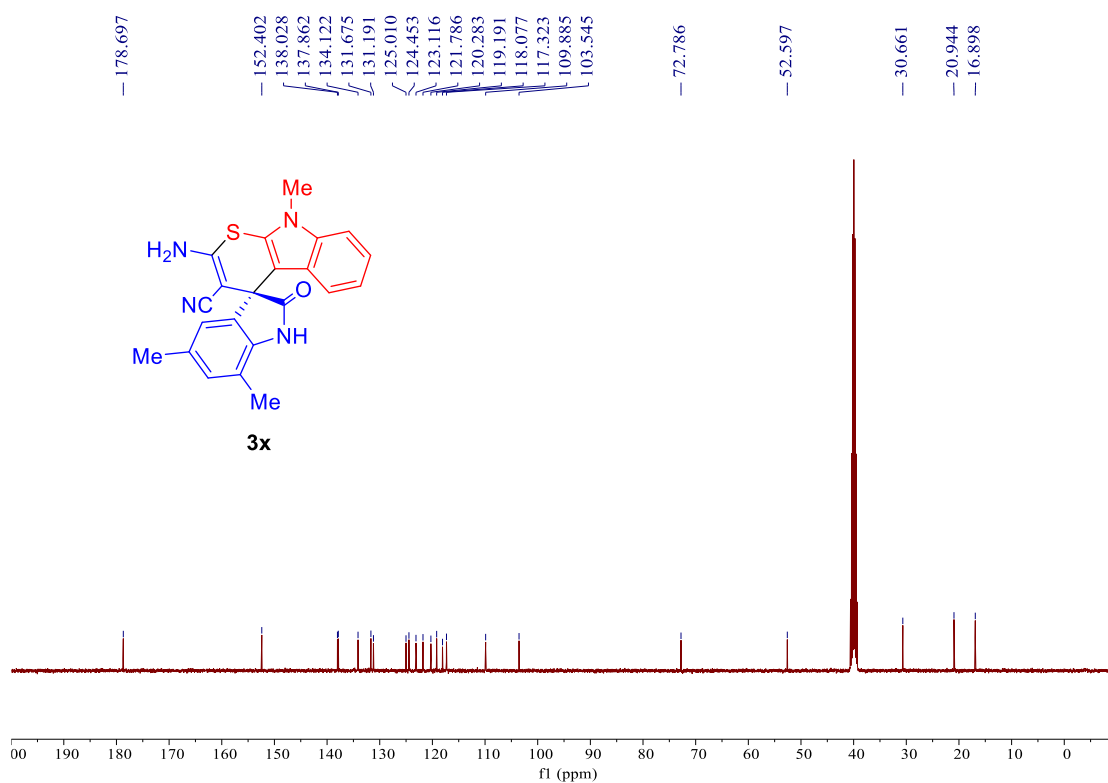

<sup>1</sup>H NMR (400 MHz, DMSO-d<sub>6</sub>)

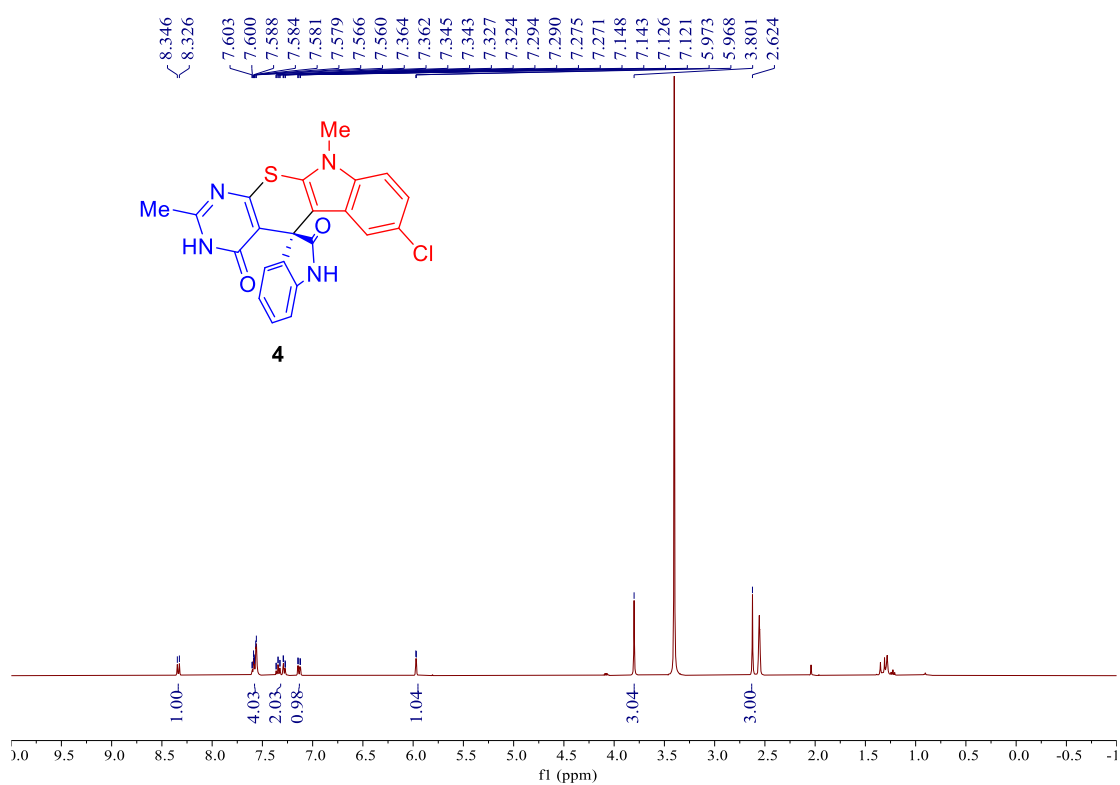

<sup>13</sup>C NMR (101 MHz, DMSO-d<sub>6</sub>)

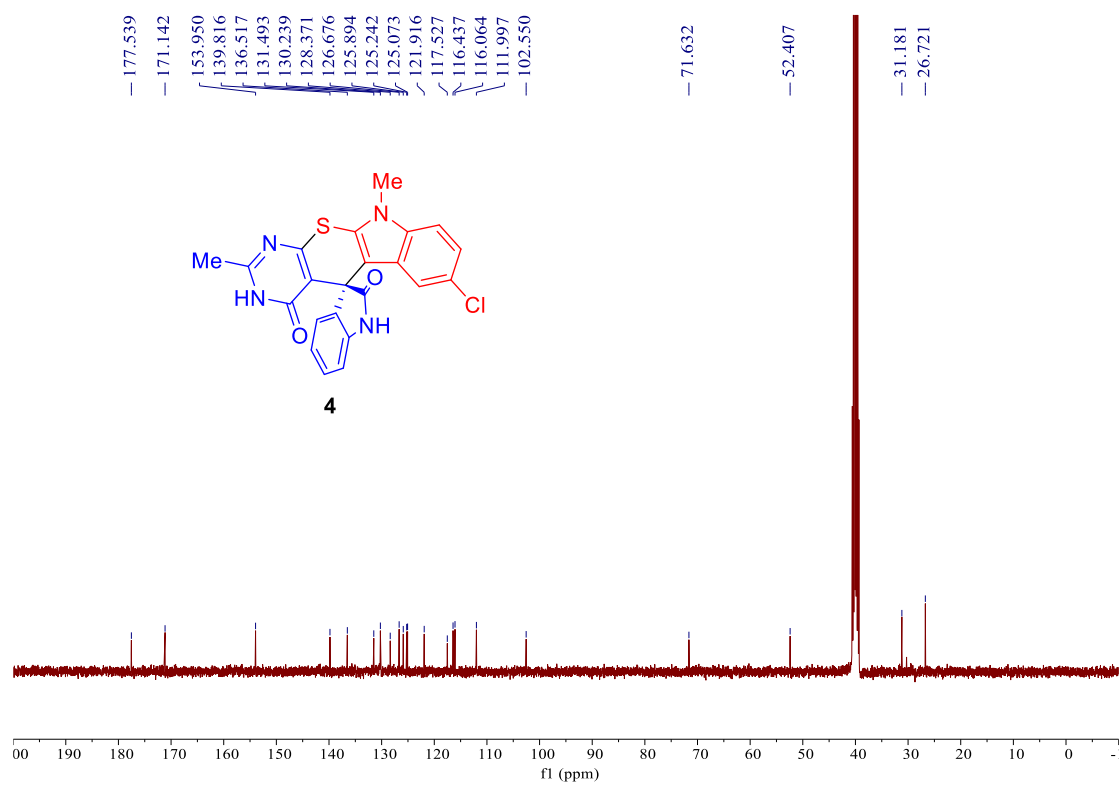

## HPLC spectra of compounds

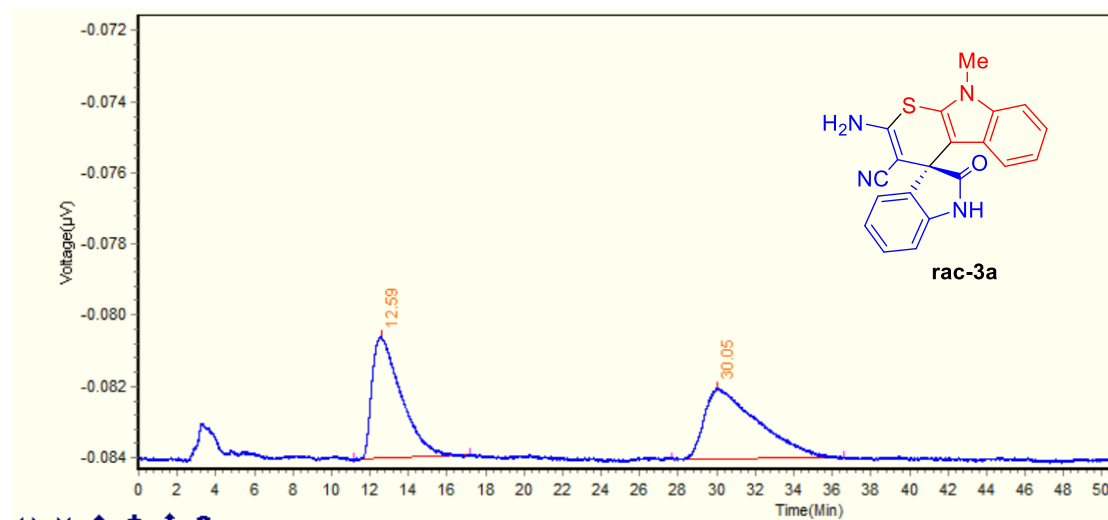

| Integration Result |                | Calculation Result |             | TimeTable   |            |    |
|--------------------|----------------|--------------------|-------------|-------------|------------|----|
| No.                | Retention Time | PeakArea           | Peak Height | PeakArea(%) | Peak Width |    |
| 1                  | 12.59          | 178500             | 1708        | 49.07%      | 6.036      | BB |
| 2                  | 30.05          | 185239             | 978         | 50.93%      | 8.939      | BB |
| Total              |                | 363,739            | 2,686       | 100.00%     |            |    |

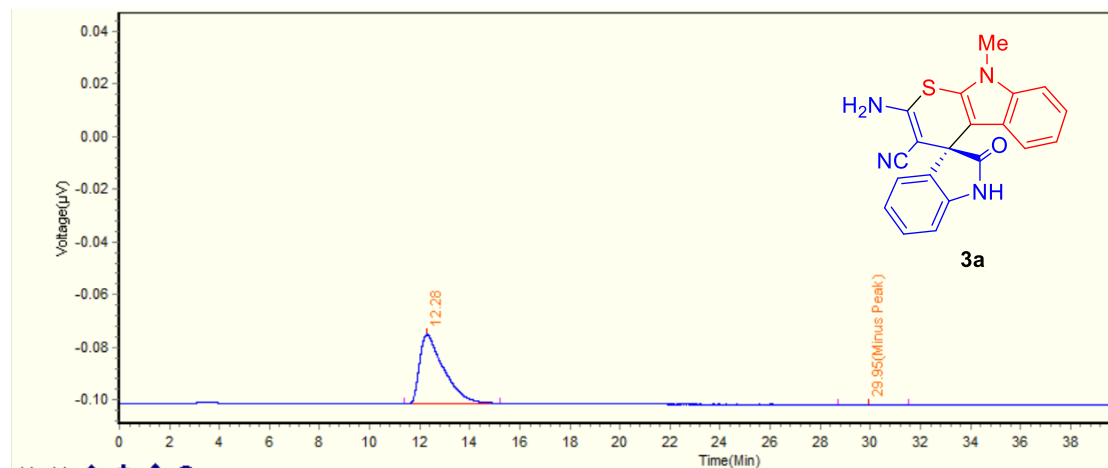

| Integration Result |                | Calculation Result |             | TimeTable   |            |    |
|--------------------|----------------|--------------------|-------------|-------------|------------|----|
| No.                | Retention Time | PeakArea           | Peak Height | PeakArea(%) | Peak Width |    |
| 1                  | 12.28          | 875437             | 13094       | 99.96%      | 3.827      | BB |
| 2                  | 29.95          | 328                | 28          | 0.04%       | 2.817      | BB |
| Total              |                | 875,765            | 13,122      | 100.00%     |            |    |

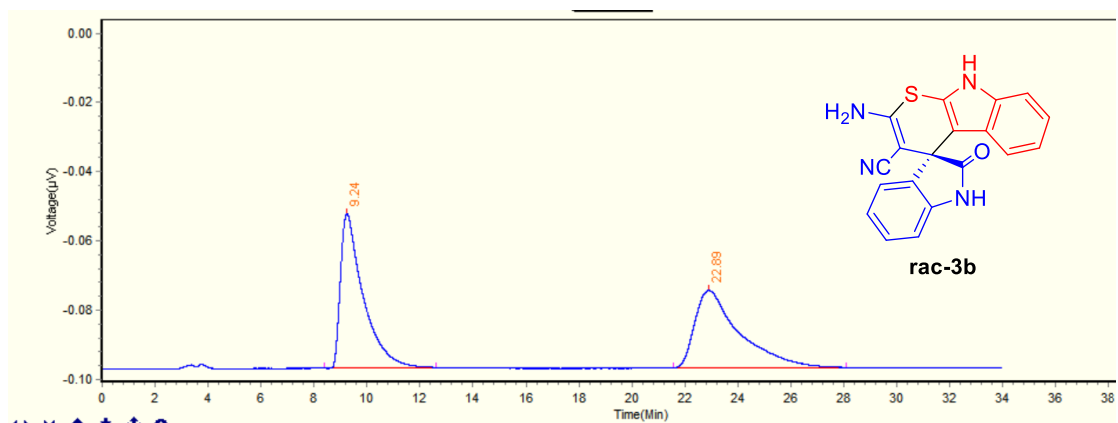

| Integration Result |                | Calculation Result |             | TimeTable   |            |           |  |
|--------------------|----------------|--------------------|-------------|-------------|------------|-----------|--|
| No.                | Retention Time | PeakArea           | Peak Height | PeakArea(%) | Peak Width | Peak Type |  |
| 1                  | 9.24           | 1324179            | 22347       | 50.40%      | 4.216      | BB        |  |
| 2                  | 22.89          | 1302951            | 11187       | 49.60%      | 6.524      | BB        |  |
| Total              |                | 2,627,130          | 33,534      | 100.00%     |            |           |  |

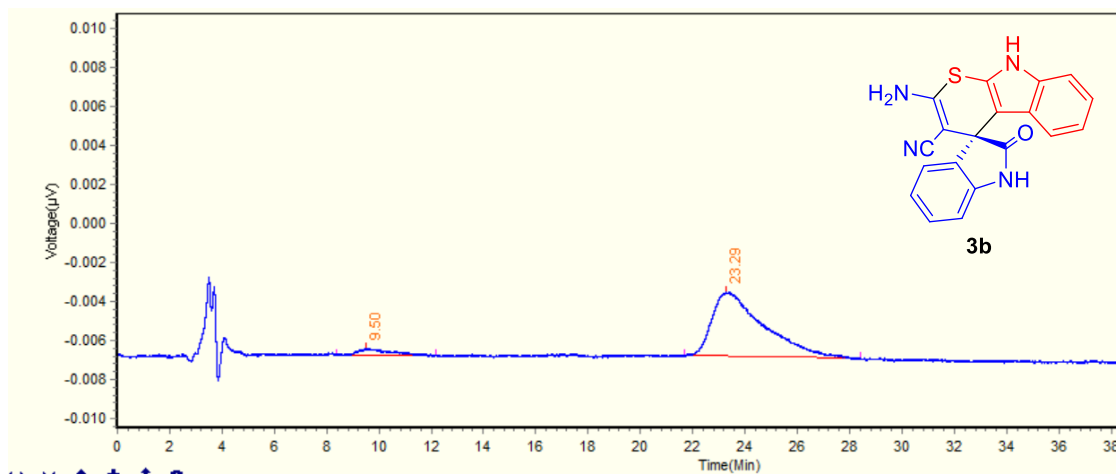

| Integration Result |                | Calculation Result |             | TimeTable   |            |    |  |
|--------------------|----------------|--------------------|-------------|-------------|------------|----|--|
| No.                | Retention Time | PeakArea           | Peak Height | PeakArea(%) | Peak Width |    |  |
| 1                  | 9.50           | 11710              | 158         | 4.96%       | 3.802      | BB |  |
| 2                  | 23.29          | 224501             | 1647        | 95.04%      | 6.731      | BB |  |
| Total              |                | 236,211            | 1,805       | 100.00%     |            |    |  |

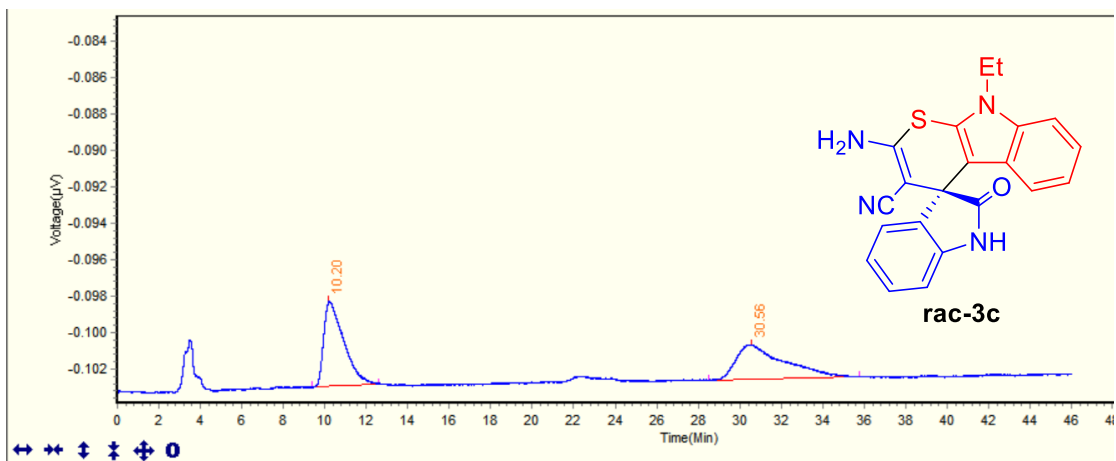

| Integration Result |                | Calculation Result |             | TimeTable   |            |         |
|--------------------|----------------|--------------------|-------------|-------------|------------|---------|
| No.                | Retention Time | PeakArea           | Peak Height | PeakArea(%) | Peak Width | Peak Ty |
| 1                  | 10.20          | 155339             | 2318        | 50.88%      | 3.208 BB   |         |
| 2                  | 30.56          | 149974             | 951         | 49.12%      | 7.263 BB   |         |
| Total              |                | 305,313            | 3,269       | 100.00%     |            |         |

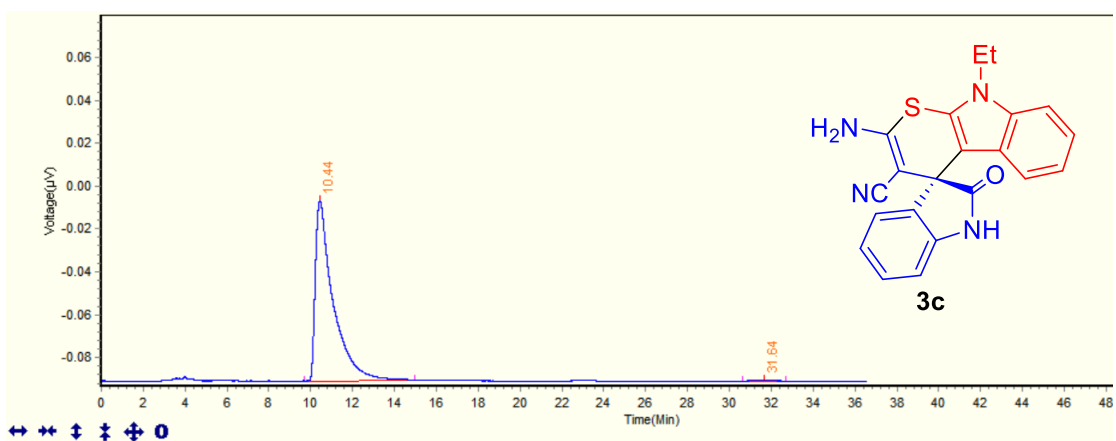

| Integration Result |                | Calculation Result |             | TimeTable   |            |           |
|--------------------|----------------|--------------------|-------------|-------------|------------|-----------|
| No.                | Retention Time | PeakArea           | Peak Height | PeakArea(%) | Peak Width | Peak Type |
| 1                  | 10.44          | 2467861            | 41978       | 99.50%      | 5.258 BB   |           |
| 2                  | 31.64          | 12491              | 177         | 0.50%       | 2.055 BB   |           |
| Total              |                | 2,480,352          | 42,155      | 100.00%     |            |           |

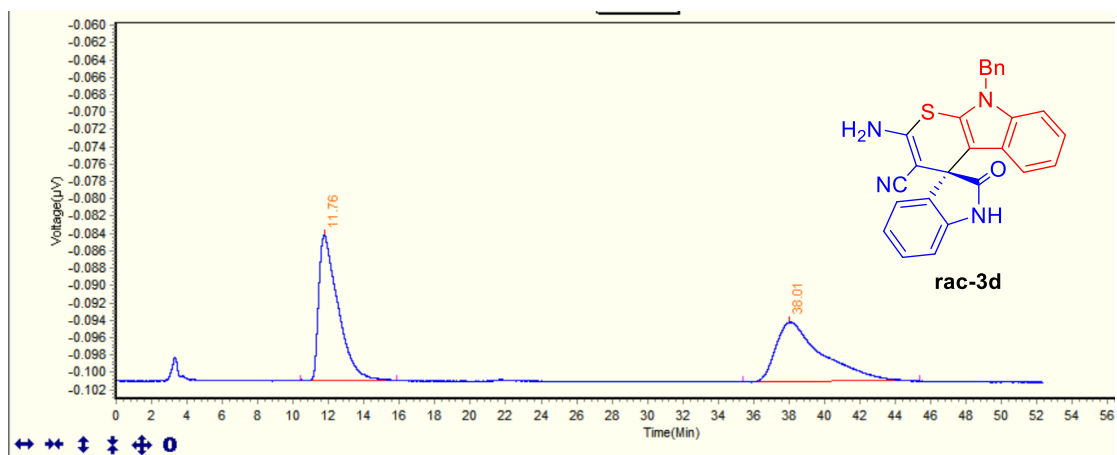

| Integration Result |                | Calculation Result | TimeTable   |             |            |           |
|--------------------|----------------|--------------------|-------------|-------------|------------|-----------|
| No.                | Retention Time | PeakArea           | Peak Height | PeakArea(%) | Peak Width | Peak Type |
| 1                  | 11.76          | 631808             | 8357        | 50.32%      | 5.441      | BB        |
| 2                  | 38.01          | 623748             | 3429        | 49.68%      | 9.986      | BB        |
| Total              |                | 1,255,556          | 11,786      | 100.00%     |            |           |

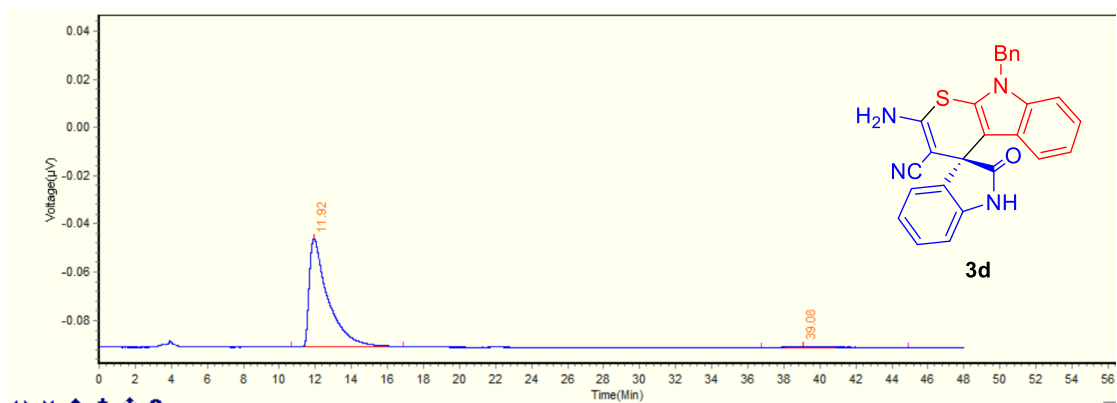

| Integration Result |                | Calculation Result | TimeTable   |             |            |           |
|--------------------|----------------|--------------------|-------------|-------------|------------|-----------|
| No.                | Retention Time | PeakArea           | Peak Height | PeakArea(%) | Peak Width | Peak Type |
| 1                  | 11.92          | 1625194            | 22446       | 97.18%      | 6.208      | BB        |
| 2                  | 39.08          | 47242              | 315         | 2.82%       | 8.153      | BB        |
| Total              |                | 1,672,436          | 22,761      | 100.00%     |            |           |



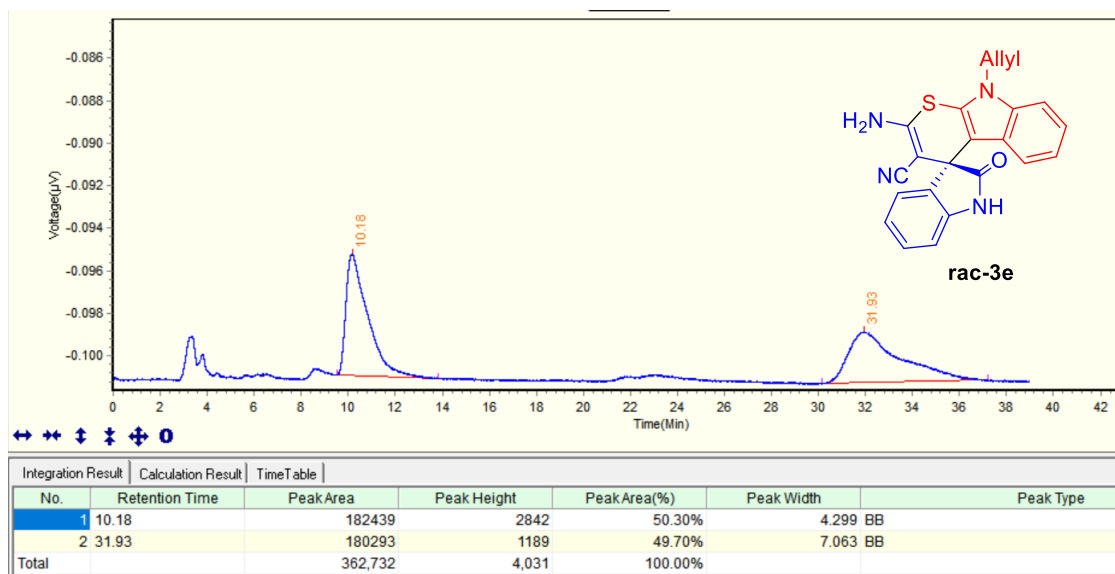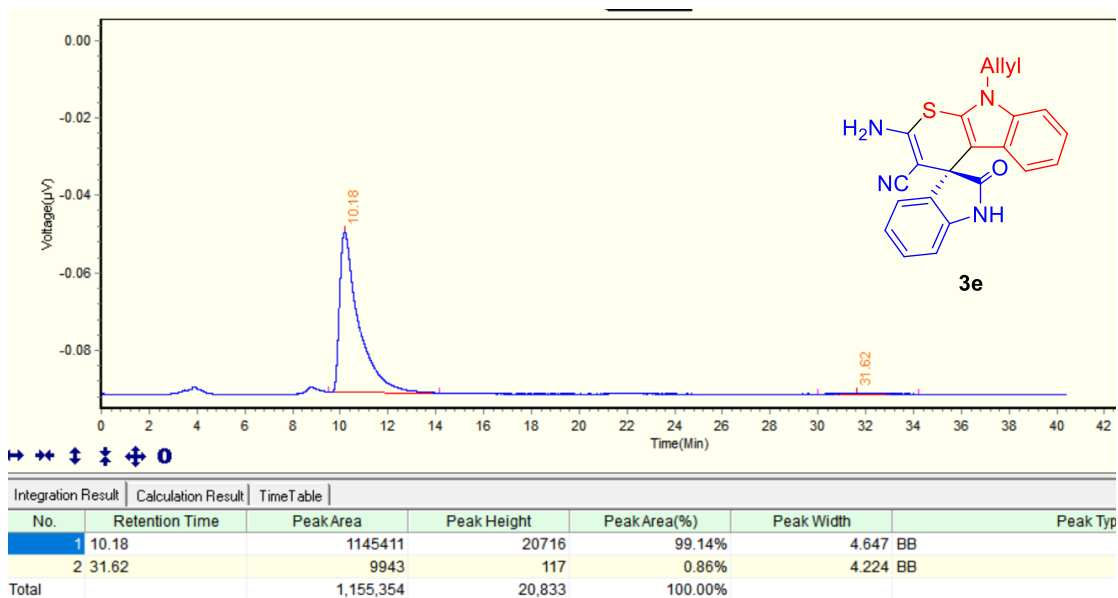

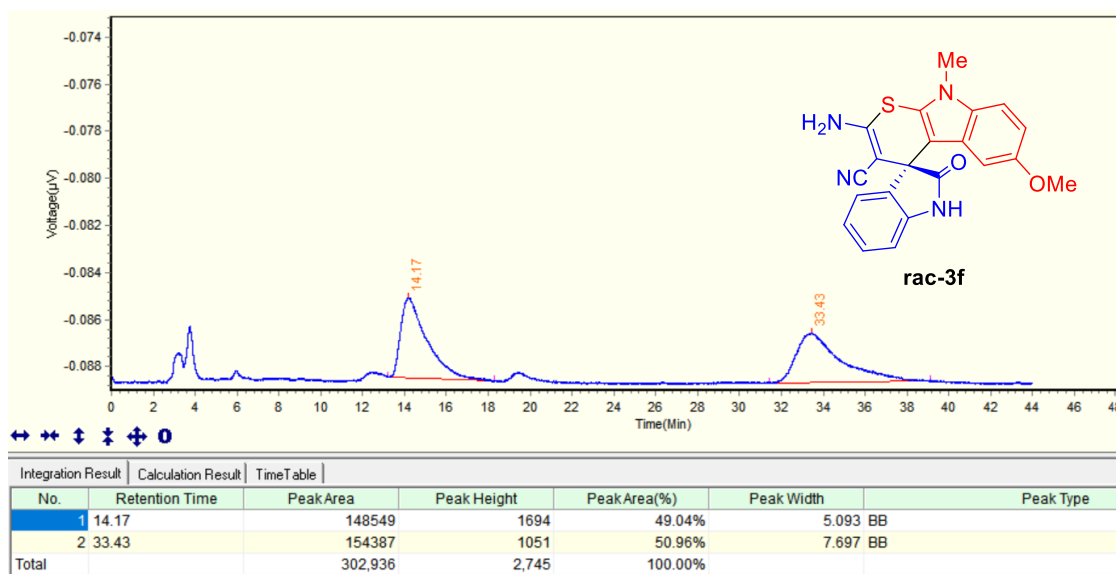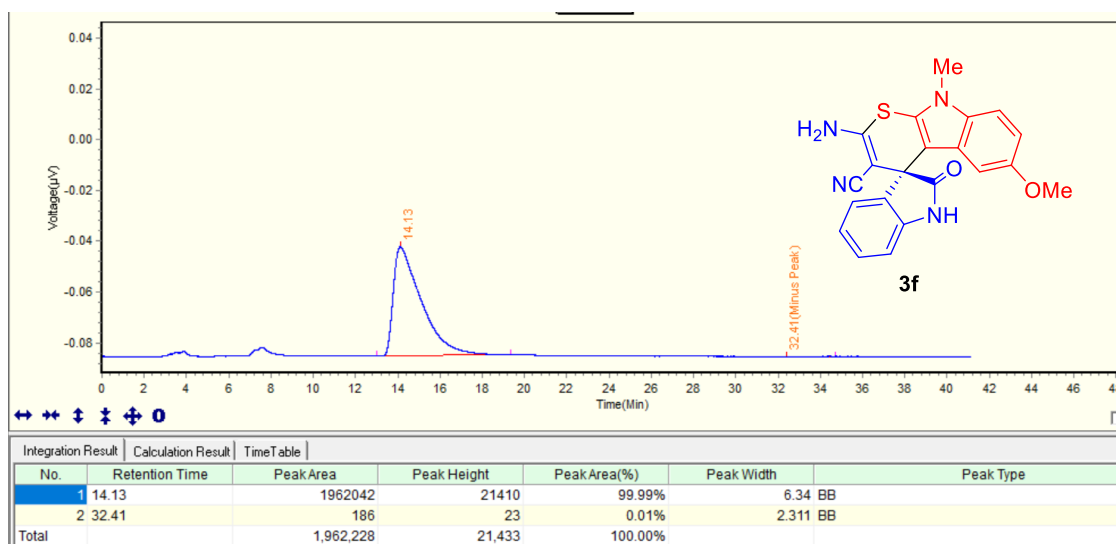

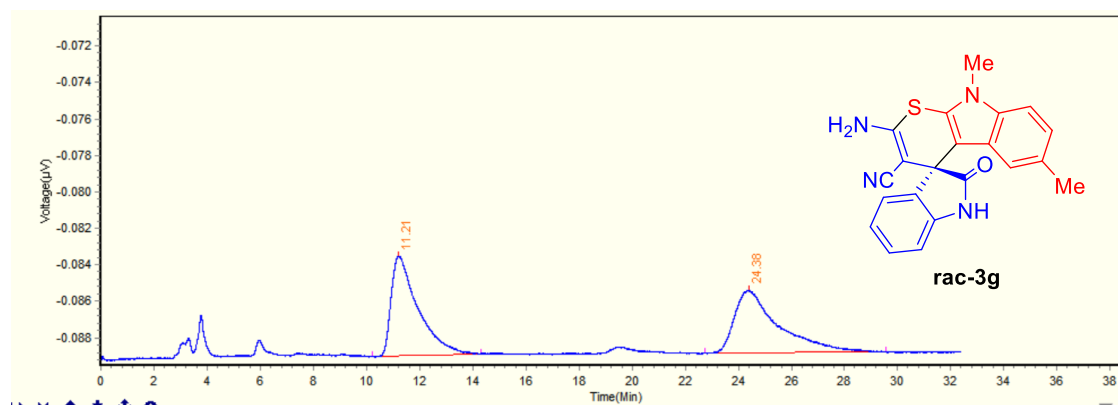

| Integration Result |                |           |             |              |            |           |
|--------------------|----------------|-----------|-------------|--------------|------------|-----------|
| No.                | Retention Time | Peak Area | Peak Height | Peak Area(%) | Peak Width | Peak Type |
| 1                  | 11.21          | 190280    | 2728        | 49.01%       | 4.088      | BB        |
| 2                  | 24.38          | 198000    | 1711        | 50.99%       | 6.814      | BB        |
| Total              |                | 388,280   | 4,439       | 100.00%      |            |           |

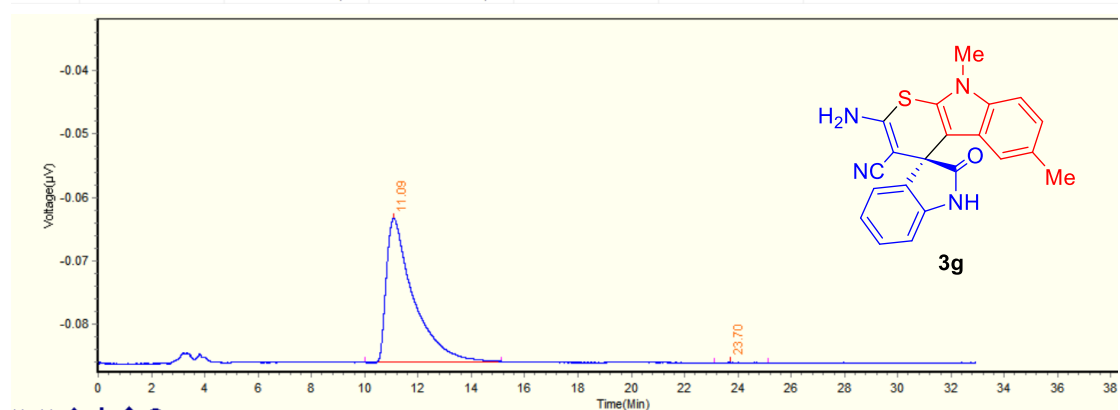

| Integration Result |                |           |             |              |            |           |
|--------------------|----------------|-----------|-------------|--------------|------------|-----------|
| No.                | Retention Time | Peak Area | Peak Height | Peak Area(%) | Peak Width | Peak Type |
| 1                  | 11.09          | 802161    | 11402       | 99.91%       | 5.112      | BB        |
| 2                  | 23.70          | 702       | 28          | 0.09%        | 2.019      | BB        |
| Total              |                | 802,863   | 11,430      | 100.00%      |            |           |

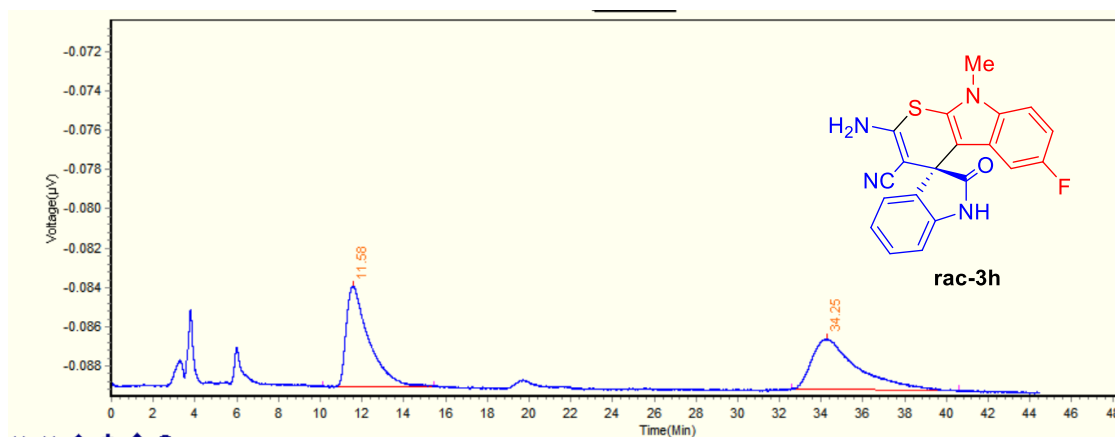

| Integration Result |                | Calculation Result | TimeTable   |              |            |           |
|--------------------|----------------|--------------------|-------------|--------------|------------|-----------|
| No.                | Retention Time | Peak Area          | Peak Height | Peak Area(%) | Peak Width | Peak Type |
| 1                  | 11.58          | 190085             | 2557        | 49.63%       | 5.323      | BB        |
| 2                  | 34.25          | 192947             | 1279        | 50.37%       | 8.013      | BB        |
| Total              |                | 383,032            | 3,836       | 100.00%      |            |           |

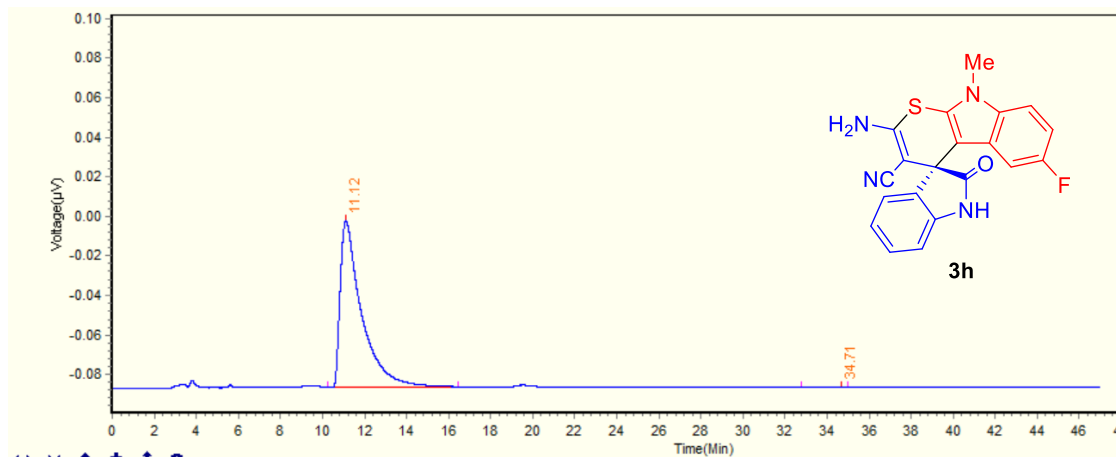

| Integration Result |                | Calculation Result | TimeTable   |              |            |           |
|--------------------|----------------|--------------------|-------------|--------------|------------|-----------|
| No.                | Retention Time | Peak Area          | Peak Height | Peak Area(%) | Peak Width | Peak Type |
| 1                  | 11.12          | 2951274            | 41959       | 99.97%       | 6.199      | BB        |
| 2                  | 34.71          | 879                | 29          | 0.03%        | 2.21       | BB        |
| Total              |                | 2,952,153          | 41,988      | 100.00%      |            |           |

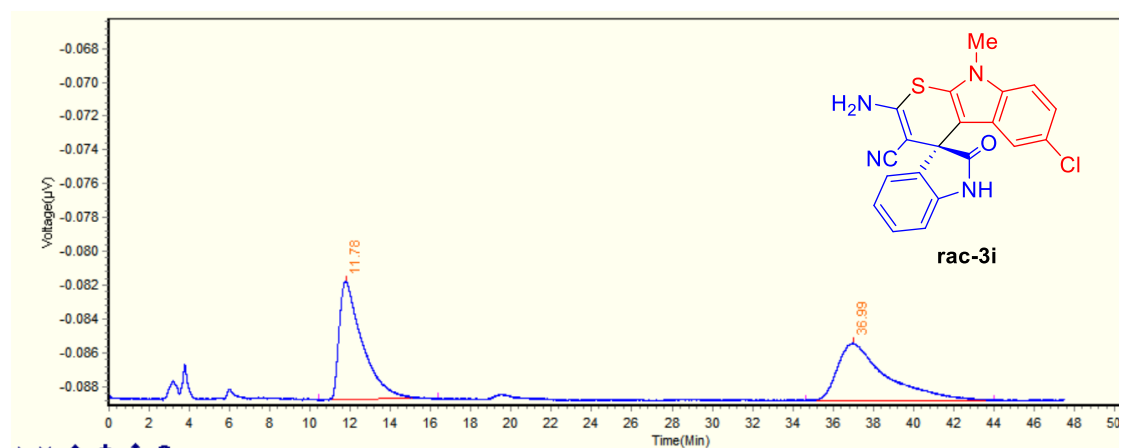

| Integration Result |                | Calculation Result | TimeTable   |              |            |    |           |
|--------------------|----------------|--------------------|-------------|--------------|------------|----|-----------|
| No.                | Retention Time | Peak Area          | Peak Height | Peak Area(%) | Peak Width |    | Peak Type |
| 1                  | 11.78          | 283554             | 3508        | 50.32%       | 5.93       | BB |           |
| 2                  | 36.99          | 279952             | 1688        | 49.68%       | 9.364      | BB |           |
| Total              |                | 563.506            | 5.196       | 100.00%      |            |    |           |

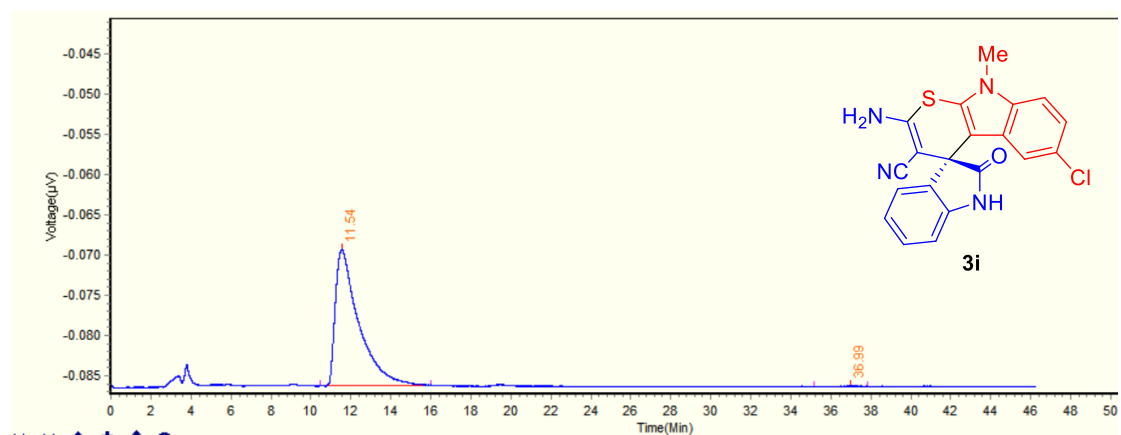

| Integration Result |                | Calculation Result | TimeTable   |              |            |    |           |
|--------------------|----------------|--------------------|-------------|--------------|------------|----|-----------|
| No.                | Retention Time | Peak Area          | Peak Height | Peak Area(%) | Peak Width |    | Peak Type |
| 1                  | 11.54          | 683520             | 8445        | 99.79%       | 5.537      | BB |           |
| 2                  | 36.99          | 1444               | 35          | 0.21%        | 2.677      | BB |           |
| Total              |                | 684,964            | 8,480       | 100.00%      |            |    |           |

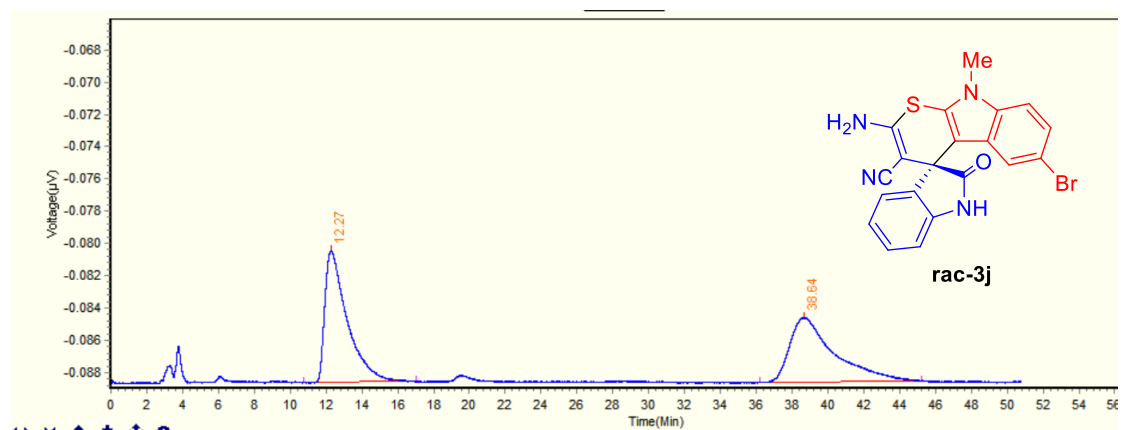

| Integration Result |                | Calculation Result | TimeTable   |             |            |           |
|--------------------|----------------|--------------------|-------------|-------------|------------|-----------|
| No.                | Retention Time | PeakArea           | Peak Height | PeakArea(%) | Peak Width | Peak Type |
| 1                  | 12.27          | 351370             | 4066        | 50.54%      | 6.278      | BB        |
| 2                  | 38.64          | 343859             | 1992        | 49.46%      | 9.016      | BB        |
| Total              |                | 695,229            | 6,058       | 100.00%     |            |           |

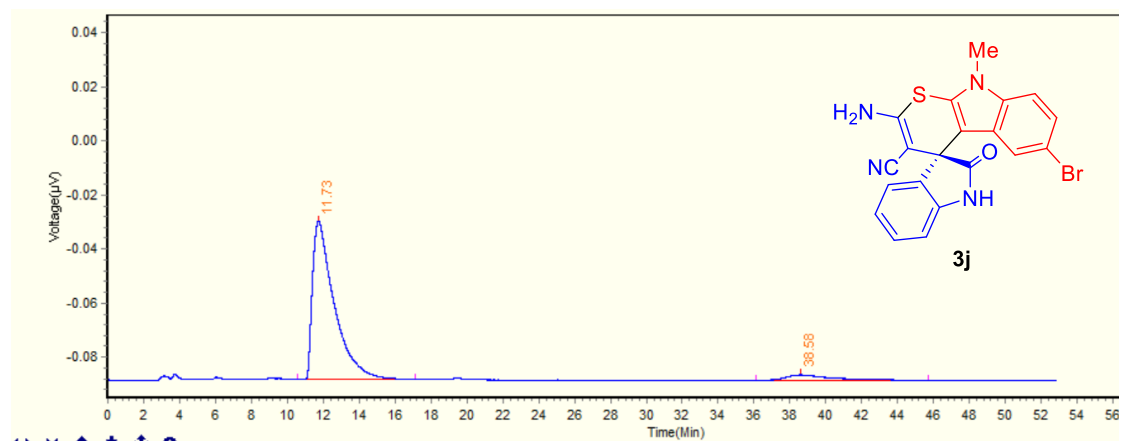

| Integration Result |                | Calculation Result | TimeTable   |             |            |           |
|--------------------|----------------|--------------------|-------------|-------------|------------|-----------|
| No.                | Retention Time | PeakArea           | Peak Height | PeakArea(%) | Peak Width | Peak Type |
| 1                  | 11.73          | 2467362            | 29271       | 93.70%      | 6.559      | BB        |
| 2                  | 38.58          | 165974             | 982         | 6.30%       | 9.598      | BB        |
| Total              |                | 2,633,336          | 30,253      | 100.00%     |            |           |

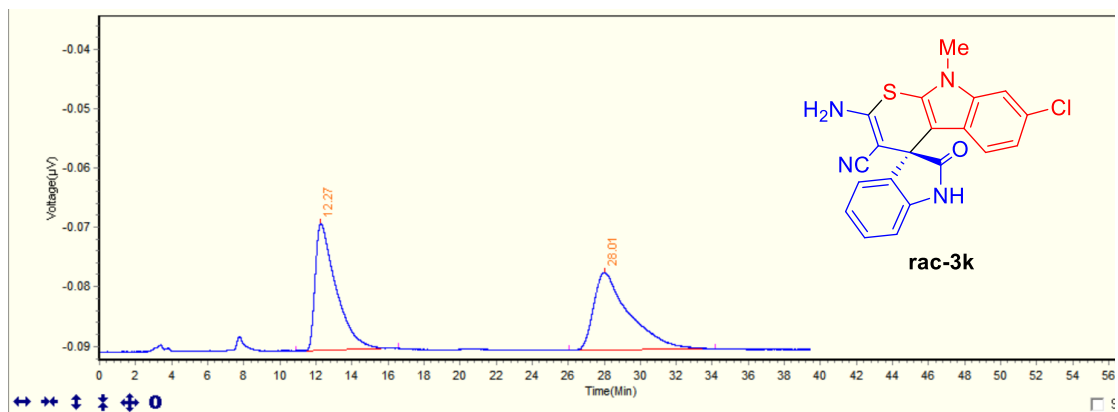

| Integration Result |                | Calculation Result |             | TimeTable   |            |    | Peak Type |
|--------------------|----------------|--------------------|-------------|-------------|------------|----|-----------|
| No.                | Retention Time | PeakArea           | Peak Height | PeakArea(%) | Peak Width |    |           |
| 1                  | 12.27          | 852278             | 10651       | 49.08%      | 5.693      | BB |           |
| 2                  | 28.01          | 884280             | 6497        | 50.92%      | 8.106      | BB |           |
| Total              |                | 1,736,558          | 17,148      | 100.00%     |            |    |           |

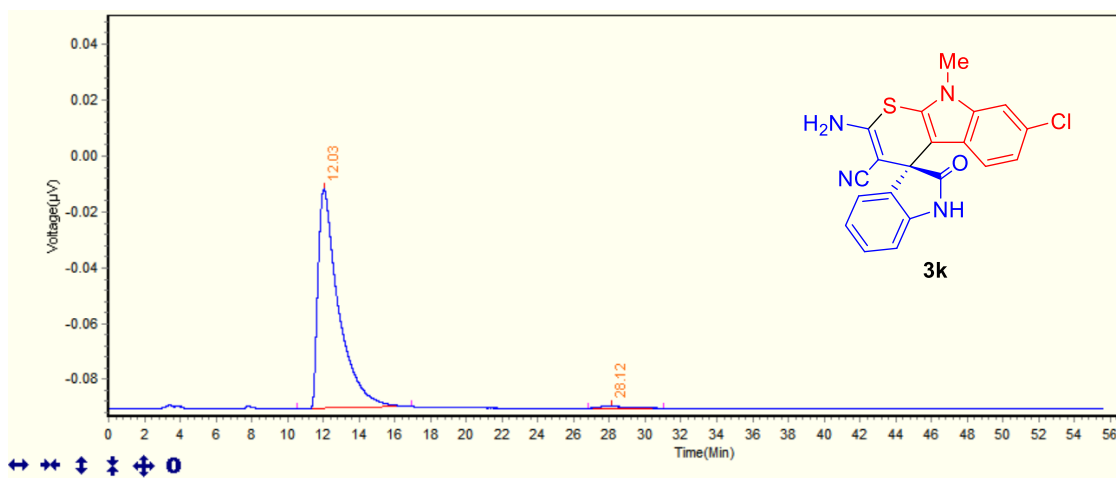

| Integration Result |                | Calculation Result |             | TimeTable   |            |    | Peak Type |
|--------------------|----------------|--------------------|-------------|-------------|------------|----|-----------|
| No.                | Retention Time | PeakArea           | Peak Height | PeakArea(%) | Peak Width |    |           |
| 1                  | 12.03          | 3141571            | 39243       | 98.71%      | 6.393      | BB |           |
| 2                  | 28.12          | 40947              | 381         | 1.29%       | 4.214      | BB |           |
| Total              |                | 3,182,518          | 39,624      | 100.00%     |            |    |           |

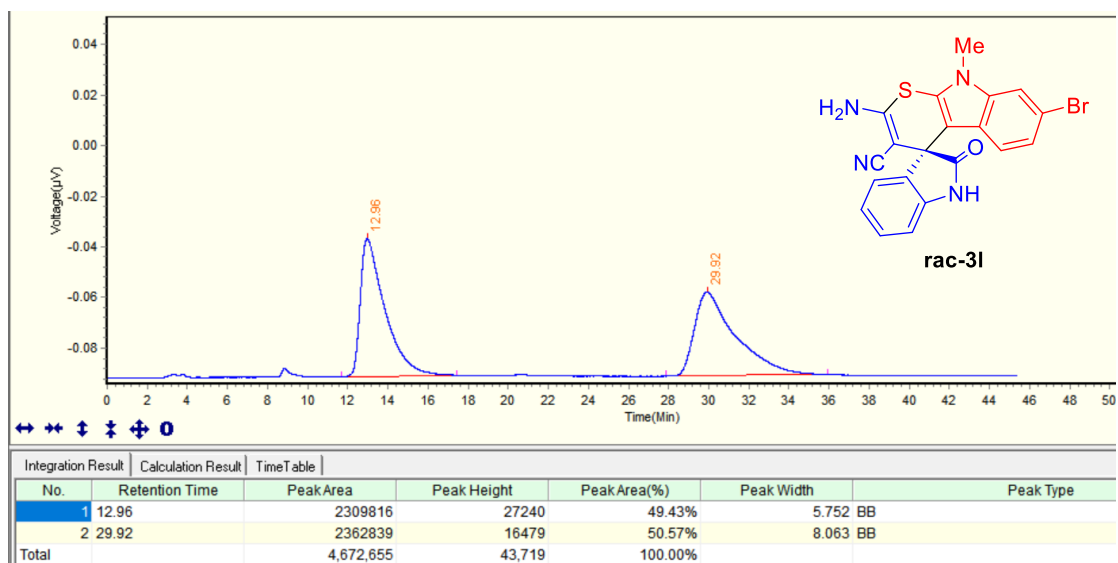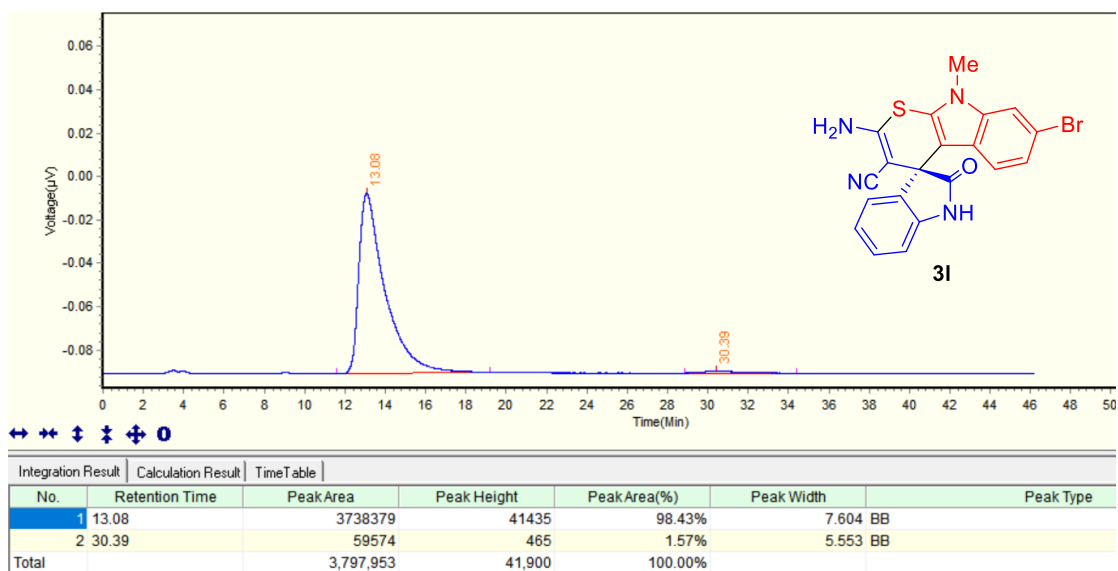



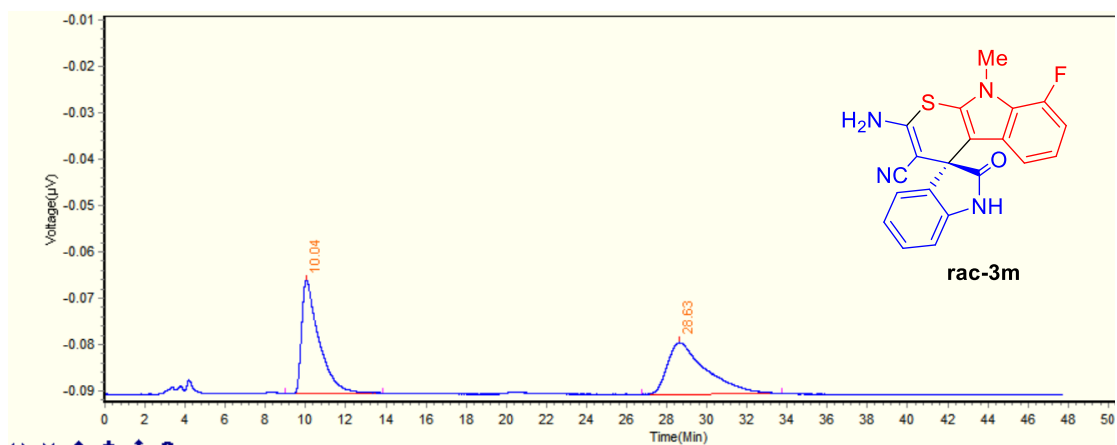

| Integration Result |                | Calculation Result | TimeTable   |              |            |           |
|--------------------|----------------|--------------------|-------------|--------------|------------|-----------|
| No.                | Retention Time | Peak Area          | Peak Height | Peak Area(%) | Peak Width | Peak Type |
| 1                  | 10.04          | 727894             | 12219       | 49.74%       | 4.863      | BB        |
| 2                  | 28.63          | 735359             | 5542        | 50.26%       | 6.984      | BB        |
| Total              |                | 1,463,253          | 17,761      | 100.00%      |            |           |

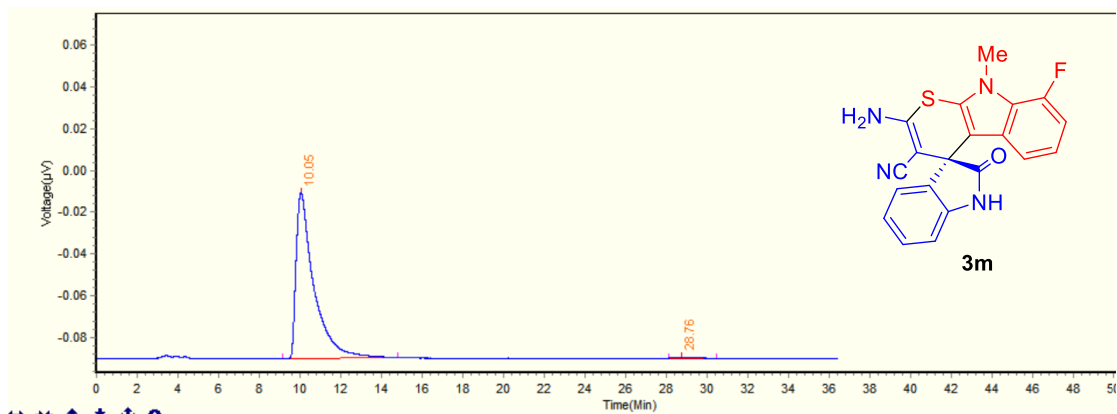

| Integration Result |                | Calculation Result | TimeTable   |              |            |           |
|--------------------|----------------|--------------------|-------------|--------------|------------|-----------|
| No.                | Retention Time | Peak Area          | Peak Height | Peak Area(%) | Peak Width | Peak Type |
| 1                  | 10.05          | 2401207            | 39730       | 99.51%       | 5.658      | BB        |
| 2                  | 28.76          | 11795              | 175         | 0.49%        | 2.343      | BB        |
| Total              |                | 2,413,002          | 39,905      | 100.00%      |            |           |

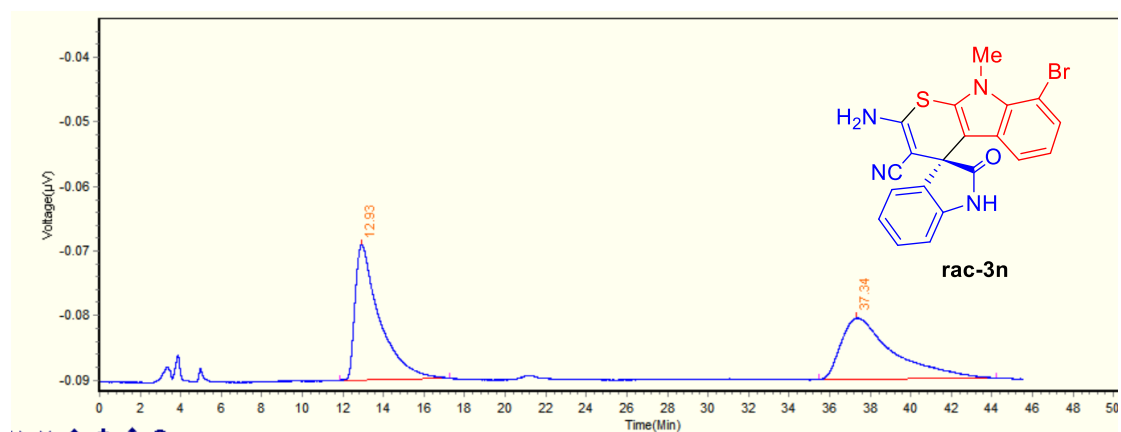

| Integration Result |                | Calculation Result | TimeTable   |             |            |           |
|--------------------|----------------|--------------------|-------------|-------------|------------|-----------|
| No.                | Retention Time | PeakArea           | Peak Height | PeakArea(%) | Peak Width | Peak Type |
| 1                  | 12.93          | 866514             | 10443       | 50.88%      | 5.415      | BB        |
| 2                  | 37.34          | 836513             | 4712        | 49.12%      | 8.748      | BB        |
| Total              |                | 1,703,027          | 15,155      | 100.00%     |            |           |

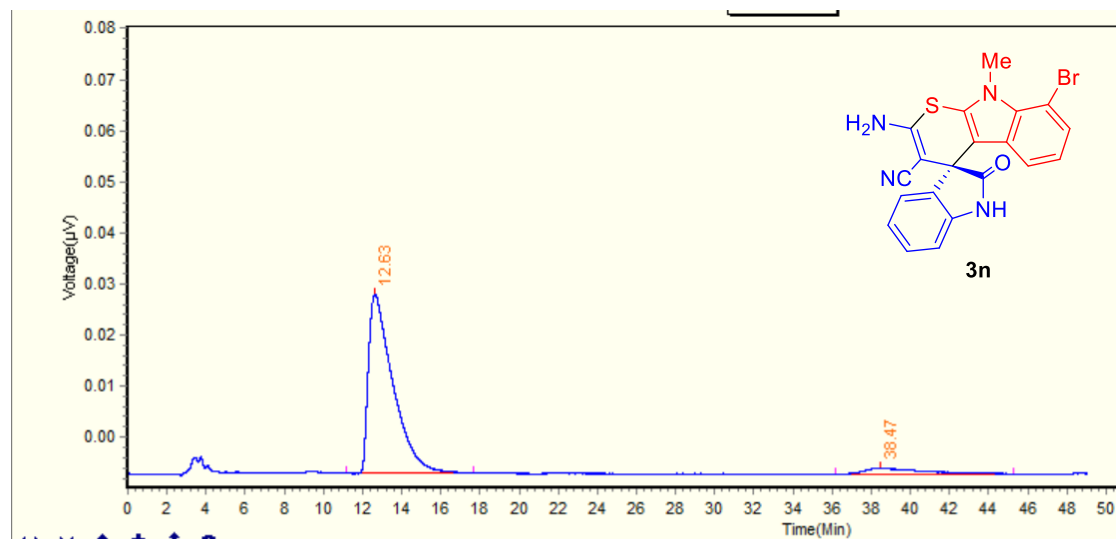

| Integration Result |                | Calculation Result | TimeTable   |             |            |           |
|--------------------|----------------|--------------------|-------------|-------------|------------|-----------|
| No.                | Retention Time | PeakArea           | Peak Height | PeakArea(%) | Peak Width | Peak Type |
| 1                  | 12.63          | 1522860            | 17546       | 92.67%      | 6.5        | BB        |
| 2                  | 38.47          | 120482             | 577         | 7.33%       | 9.112      | BB        |
| Total              |                | 1,643,342          | 18,123      | 100.00%     |            |           |

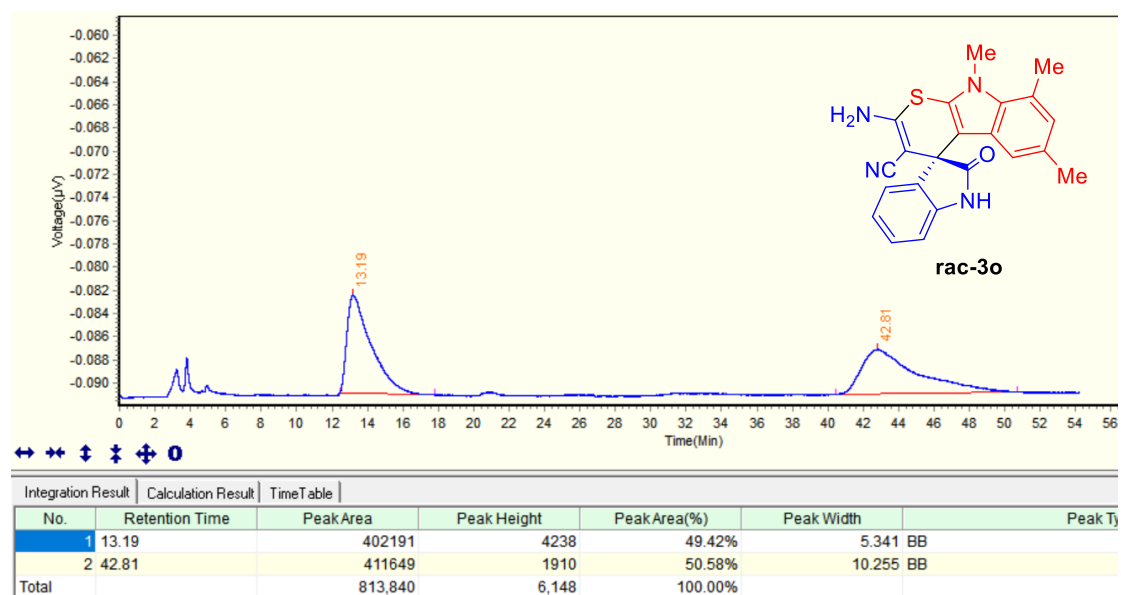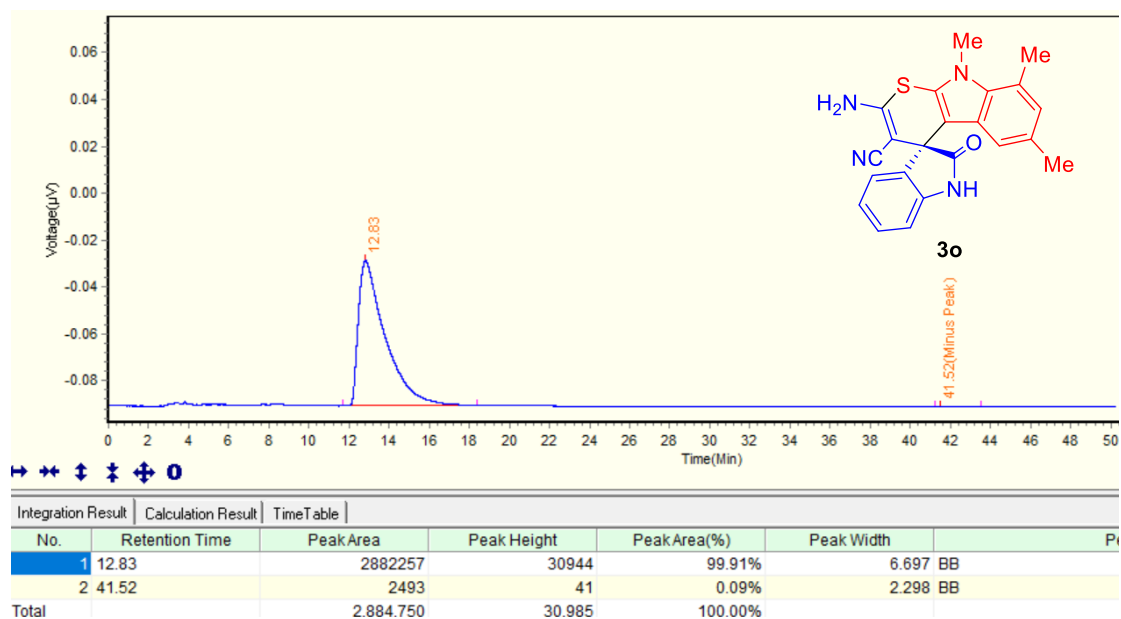

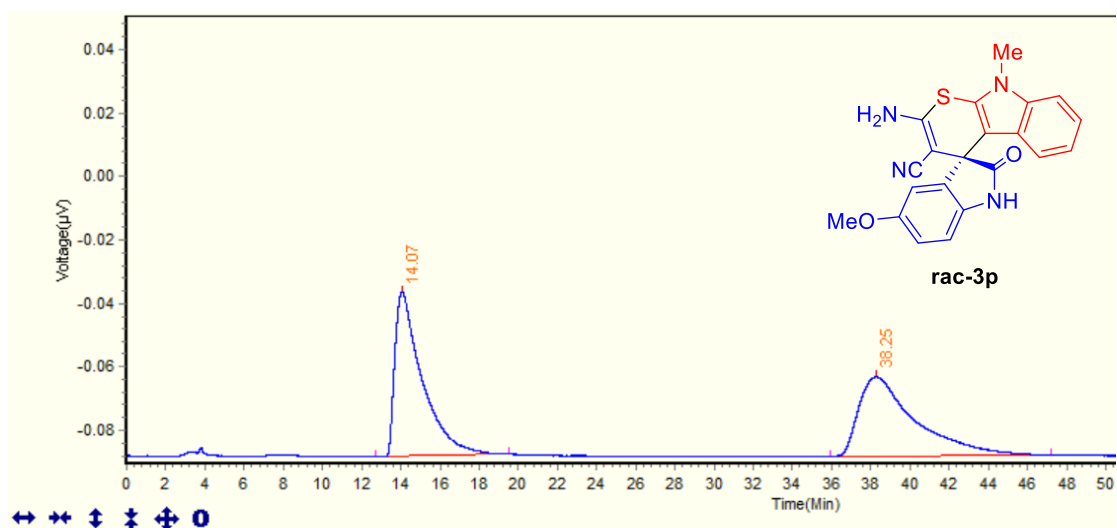

| Integration Result |                | Calculation Result | TimeTable   |             |            |    |
|--------------------|----------------|--------------------|-------------|-------------|------------|----|
| No.                | Retention Time | PeakArea           | Peak Height | PeakArea(%) | Peak Width |    |
| 1                  | 14.07          | 2494171            | 25842       | 50.10%      | 6.754      | BB |
| 2                  | 38.25          | 2483732            | 12468       | 49.90%      | 11.22      | BB |
| Total              |                | 4,977,903          | 38,310      | 100.00%     |            |    |

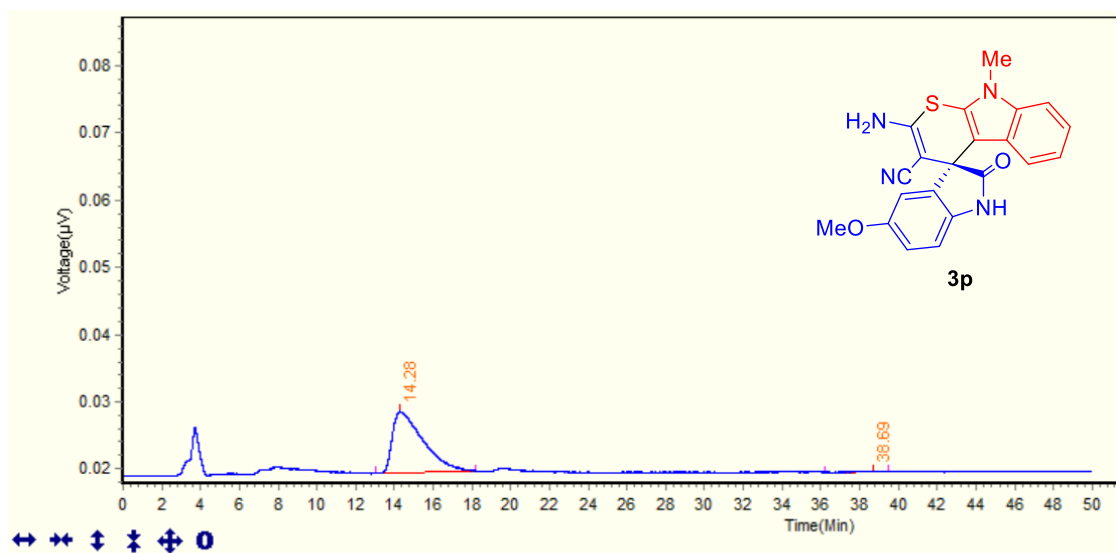

| Integration Result |                | Calculation Result | TimeTable   |             |            |    |
|--------------------|----------------|--------------------|-------------|-------------|------------|----|
| No.                | Retention Time | PeakArea           | Peak Height | PeakArea(%) | Peak Width |    |
| 1                  | 14.28          | 494823             | 4555        | 99.71%      | 5.15       | BB |
| 2                  | 38.69          | 1463               | 60          | 0.29%       | 3.278      | BB |
| Total              |                | 496,286            | 4,615       | 100.00%     |            |    |

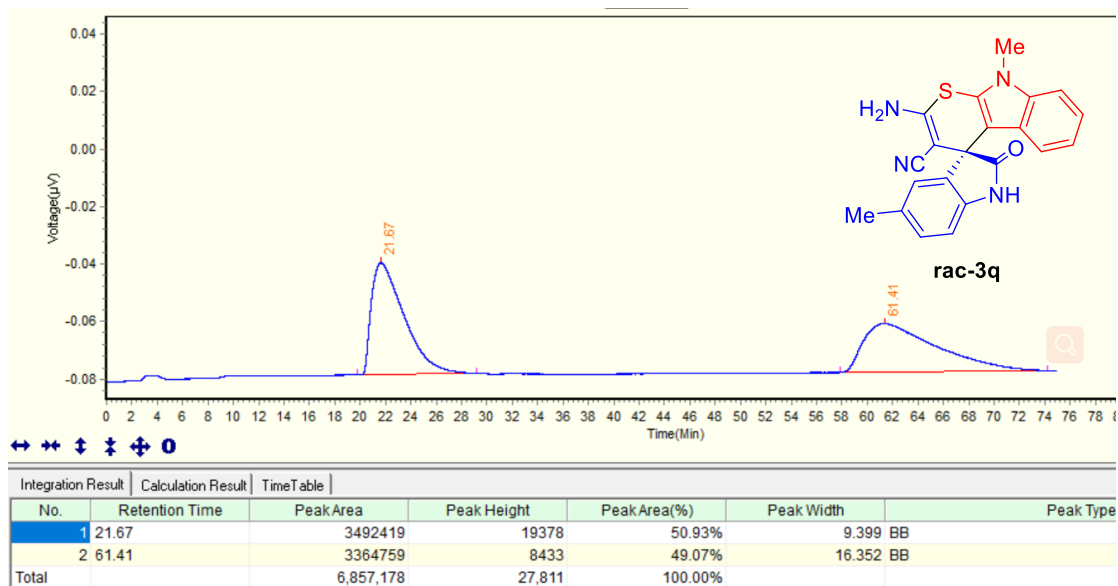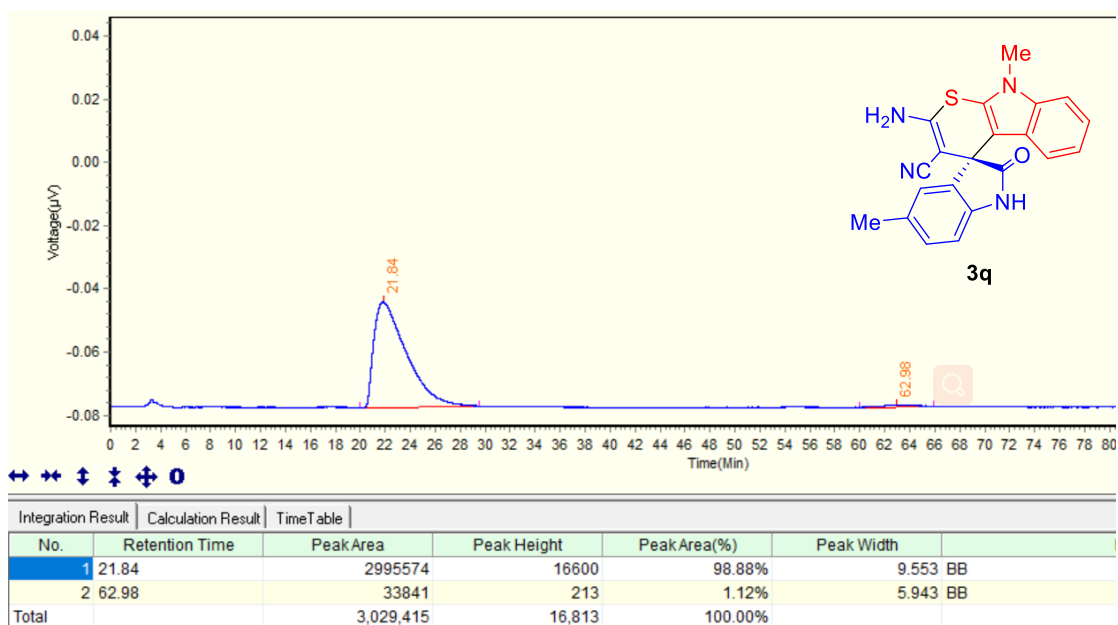

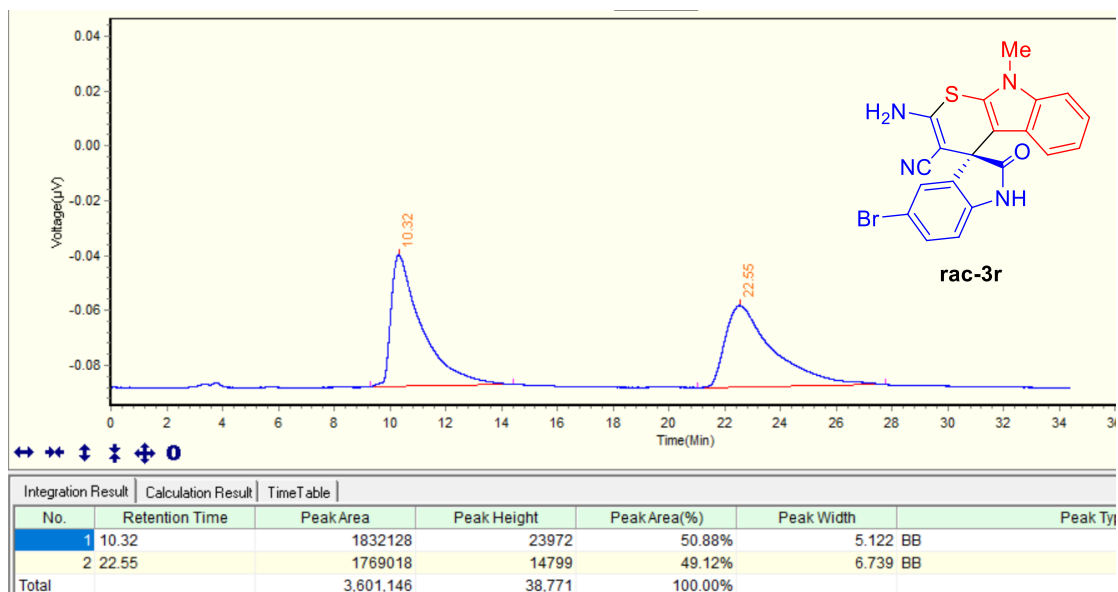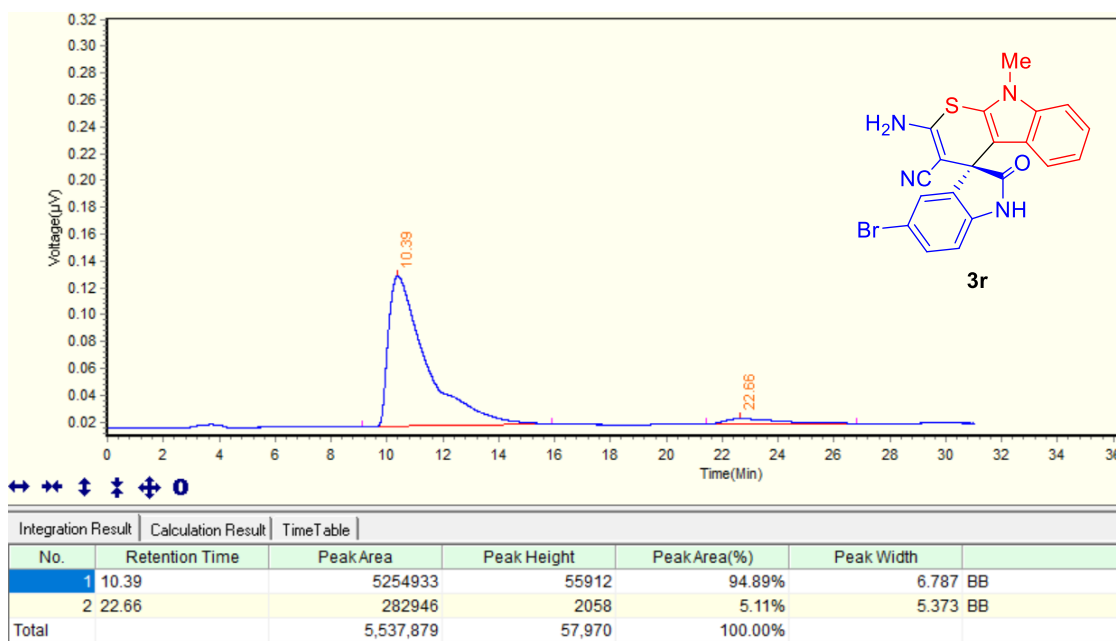

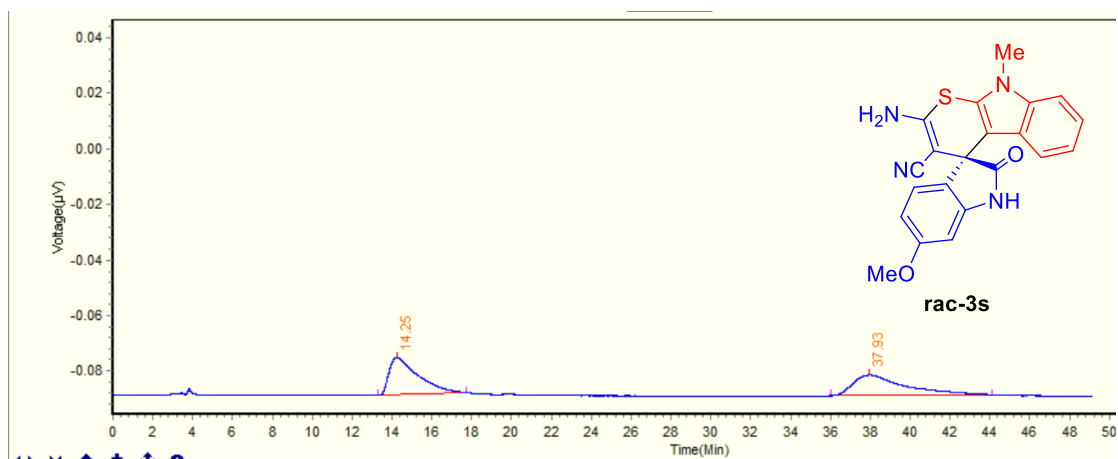

| Integration Result |                | Calculation Result | TimeTable   |             |            |      |
|--------------------|----------------|--------------------|-------------|-------------|------------|------|
| No.                | Retention Time | PeakArea           | Peak Height | PeakArea(%) | Peak Width | Peak |
| 1                  | 14.25          | 681524             | 6753        | 50.74%      | 4.431 BB   |      |
| 2                  | 37.93          | 661576             | 3664        | 49.26%      | 8.091 BB   |      |
| Total              |                | 1,343,100          | 10,417      | 100.00%     |            |      |

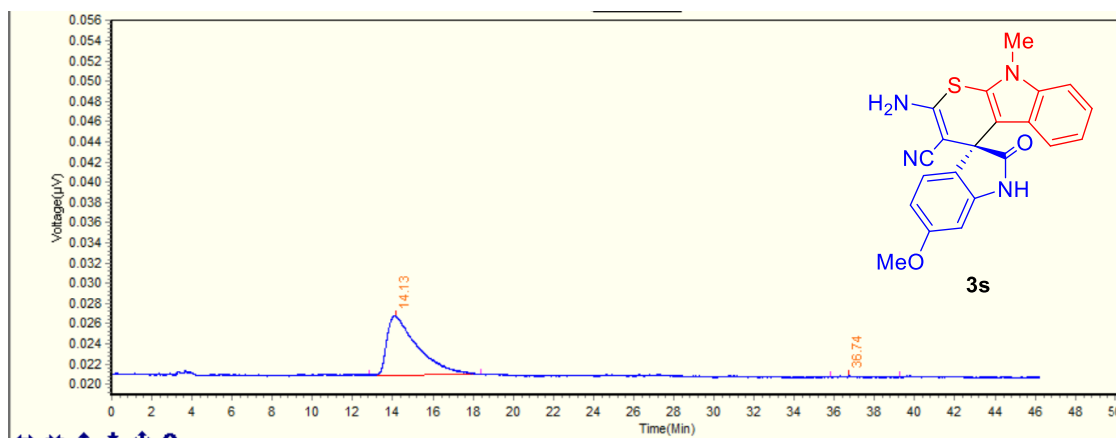

| Integration Result |                | Calculation Result | TimeTable   |             |            |           |
|--------------------|----------------|--------------------|-------------|-------------|------------|-----------|
| No.                | Retention Time | PeakArea           | Peak Height | PeakArea(%) | Peak Width | Peak Type |
| 1                  | 14.13          | 306951             | 2927        | 99.74%      | 5.594 BB   |           |
| 2                  | 36.74          | 791                | 55          | 0.26%       | 3.427 BB   |           |
| Total              |                | 307,742            | 2,982       | 100.00%     |            |           |

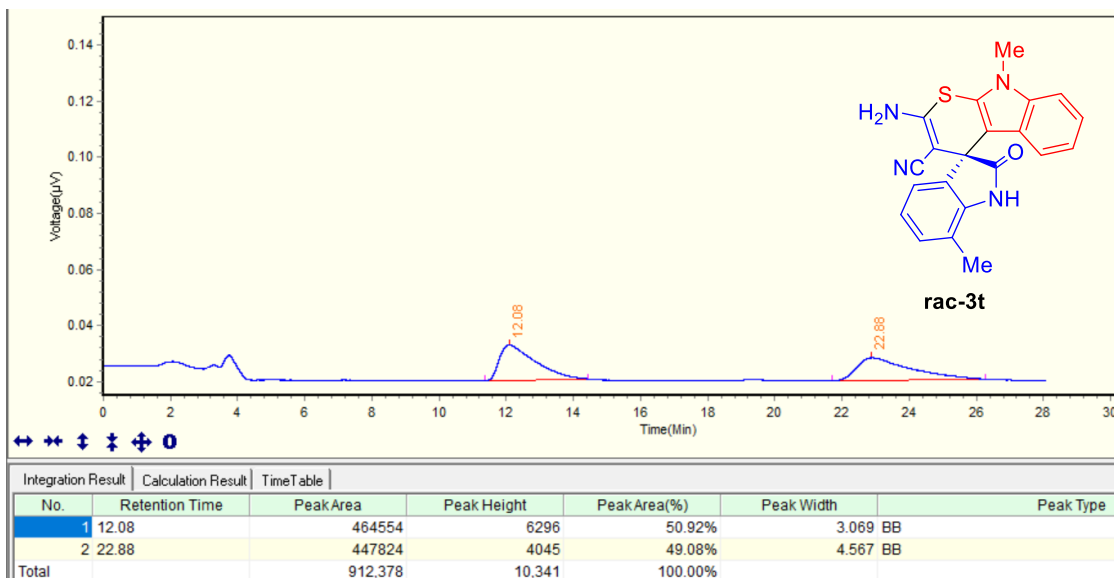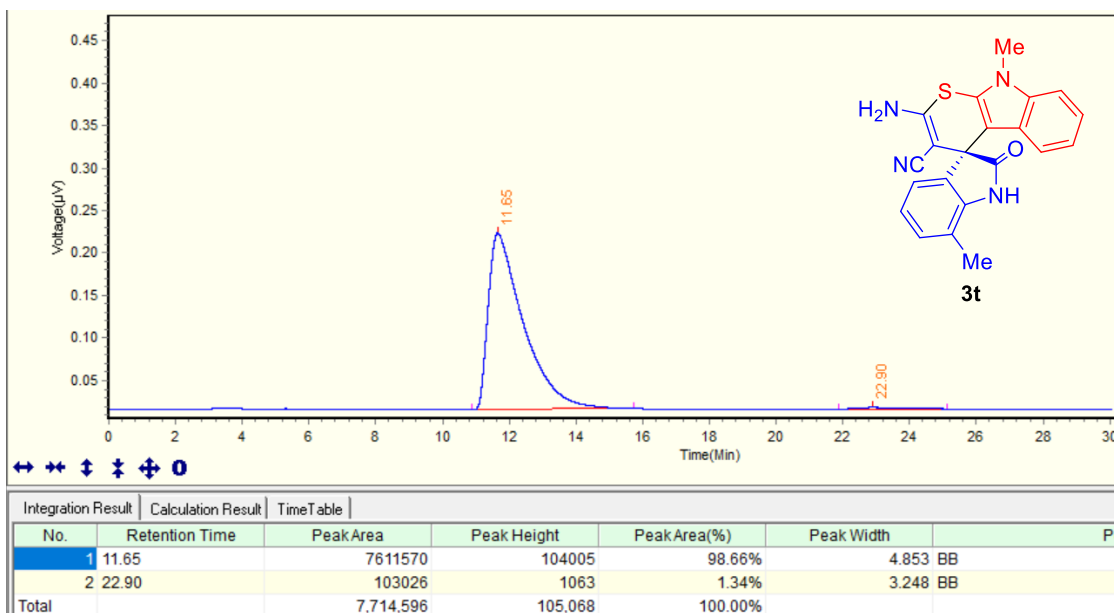



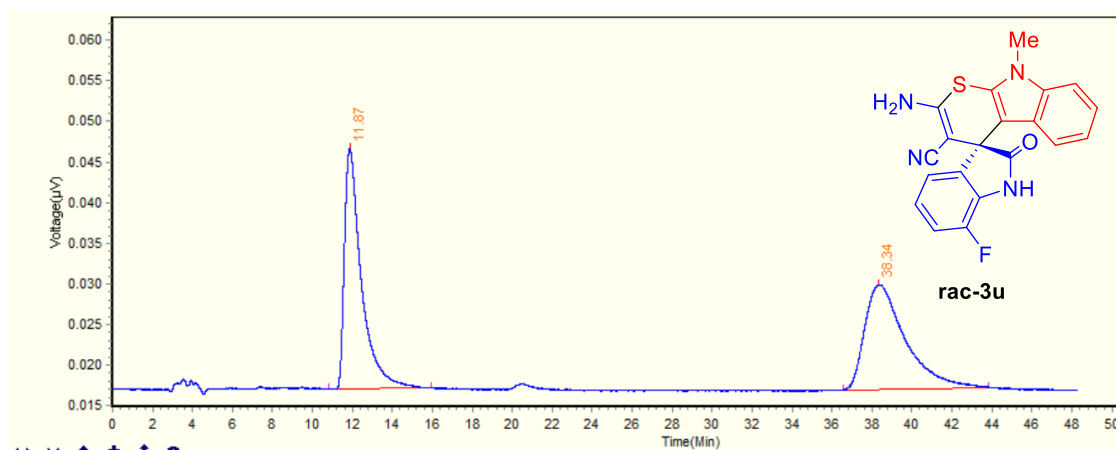

| Integration Result |                | Calculation Result | TimeTable   |             |            |        |
|--------------------|----------------|--------------------|-------------|-------------|------------|--------|
| No.                | Retention Time | Peak Area          | Peak Height | PeakArea(%) | Peak Width | Peak T |
| 1                  | 11.87          | 872320             | 14799       | 49.06%      | 5.123 BB   |        |
| 2                  | 38.34          | 905847             | 6439        | 50.94%      | 7.273 BB   |        |
| Total              |                | 1,778,167          | 21,238      | 100.00%     |            |        |

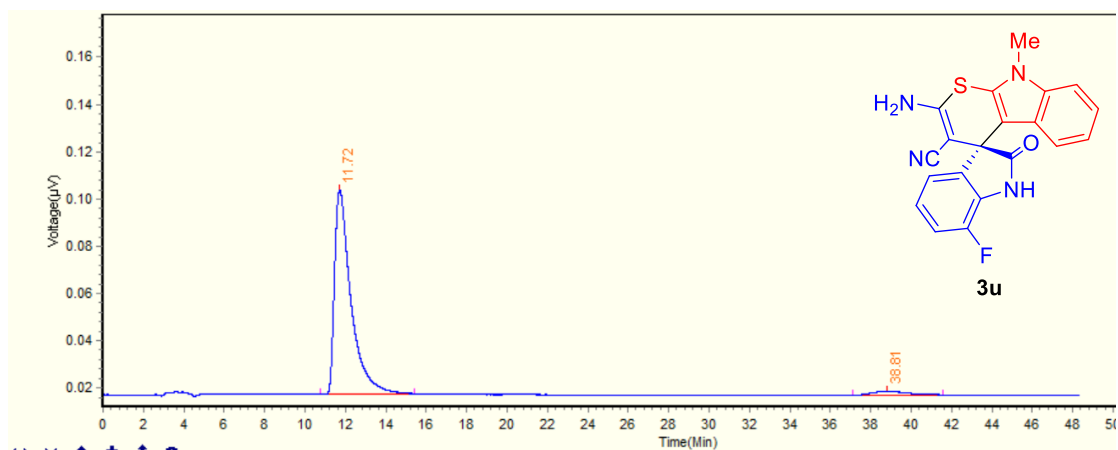

| Integration Result |                | Calculation Result | TimeTable   |             |            |        |
|--------------------|----------------|--------------------|-------------|-------------|------------|--------|
| No.                | Retention Time | Peak Area          | Peak Height | PeakArea(%) | Peak Width | Peak T |
| 1                  | 11.72          | 2445593            | 43258       | 96.06%      | 4.653 BB   |        |
| 2                  | 38.81          | 100363             | 829         | 3.94%       | 4.466 BB   |        |
| Total              |                | 2,545,956          | 44,087      | 100.00%     |            |        |

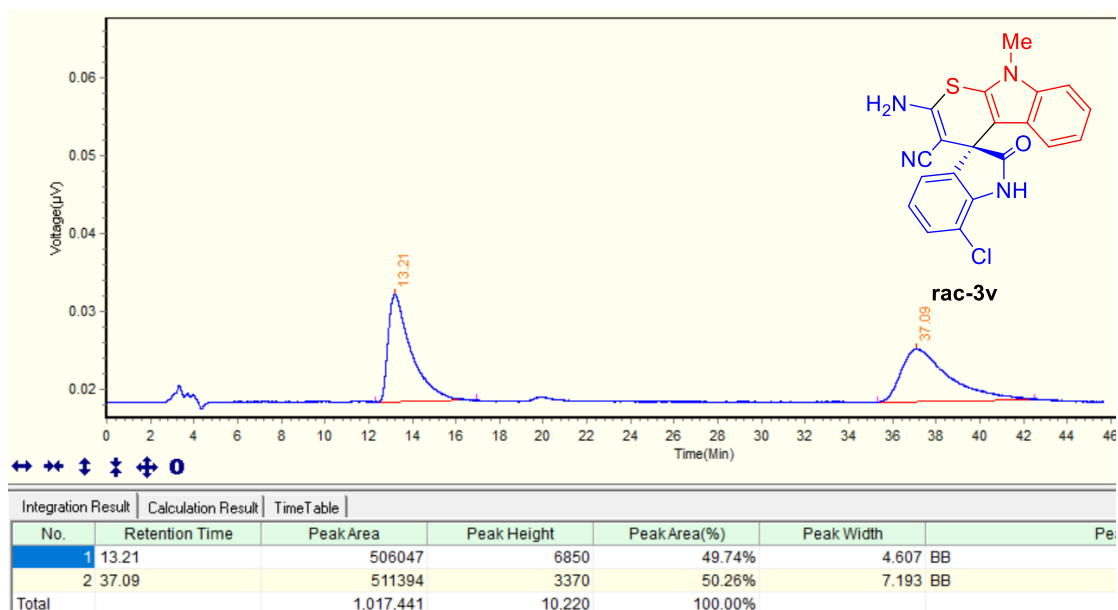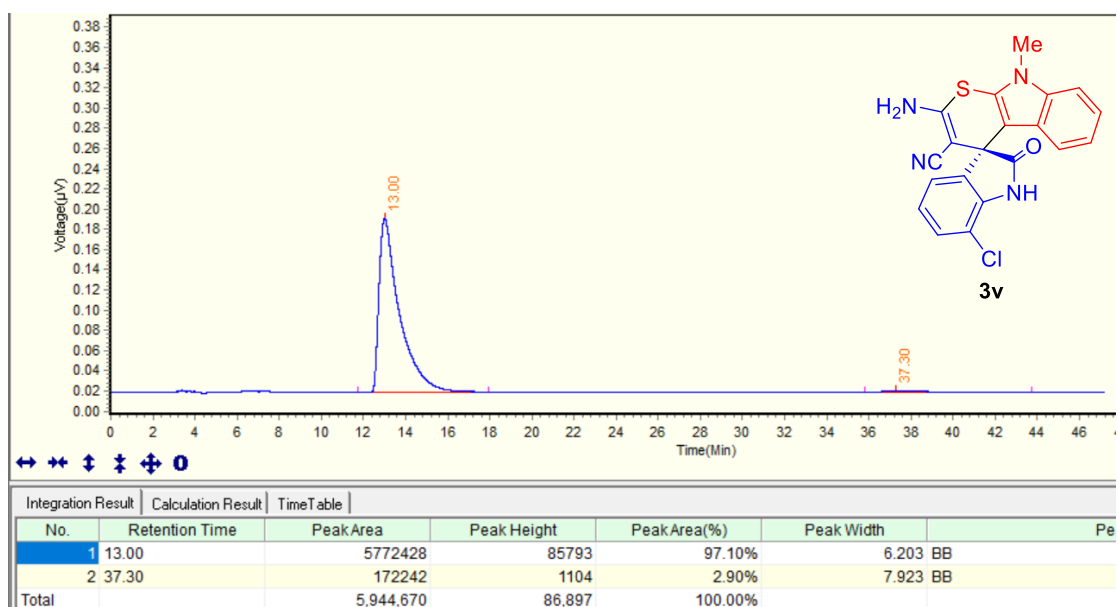

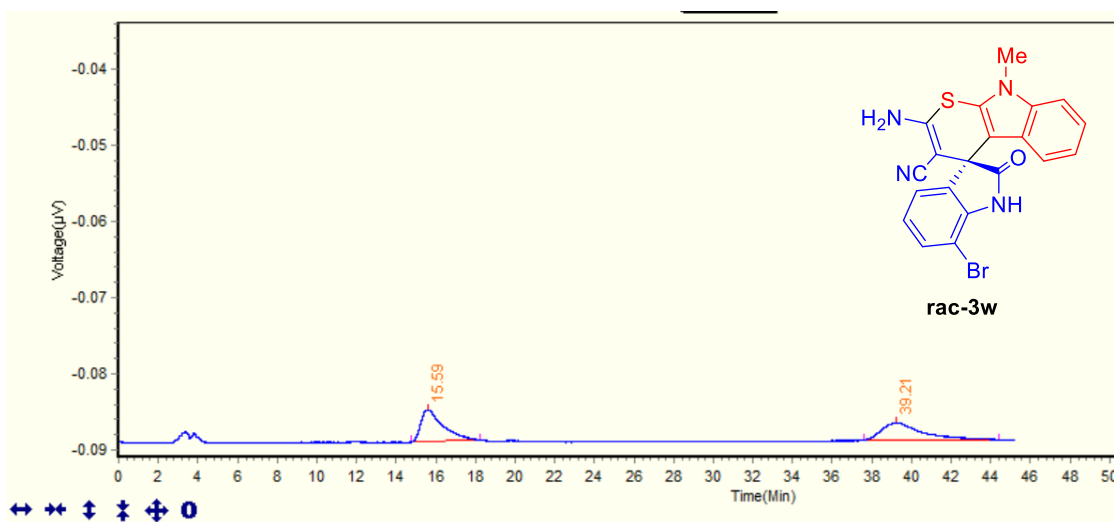

| Integration Result |                | Calculation Result | TimeTable   |             |            |    |
|--------------------|----------------|--------------------|-------------|-------------|------------|----|
| No.                | Retention Time | PeakArea           | Peak Height | PeakArea(%) | Peak Width |    |
| 1                  | 15.59          | 162598             | 2082        | 50.27%      | 3.428      | BB |
| 2                  | 39.21          | 160848             | 1122        | 49.73%      | 6.798      | BB |
| Total              |                | 323,446            | 3,204       | 100.00%     |            |    |

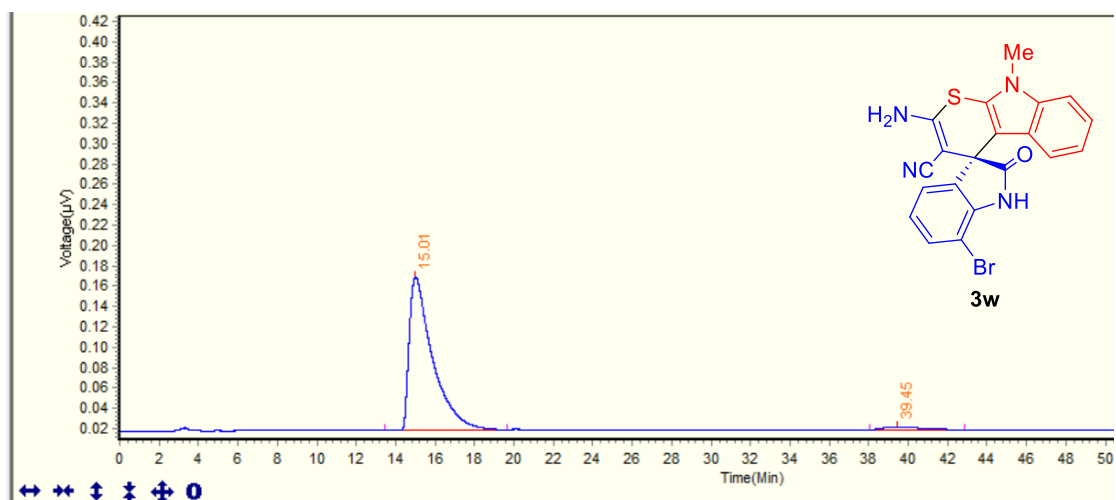

| Integration Result |                | Calculation Result | TimeTable   |             |            |    |
|--------------------|----------------|--------------------|-------------|-------------|------------|----|
| No.                | Retention Time | PeakArea           | Peak Height | PeakArea(%) | Peak Width |    |
| 1                  | 15.01          | 6177198            | 75240       | 96.91%      | 6.202      | BB |
| 2                  | 39.45          | 197236             | 1534        | 3.09%       | 4.808      | BB |
| Total              |                | 6,374,434          | 76,774      | 100.00%     |            |    |

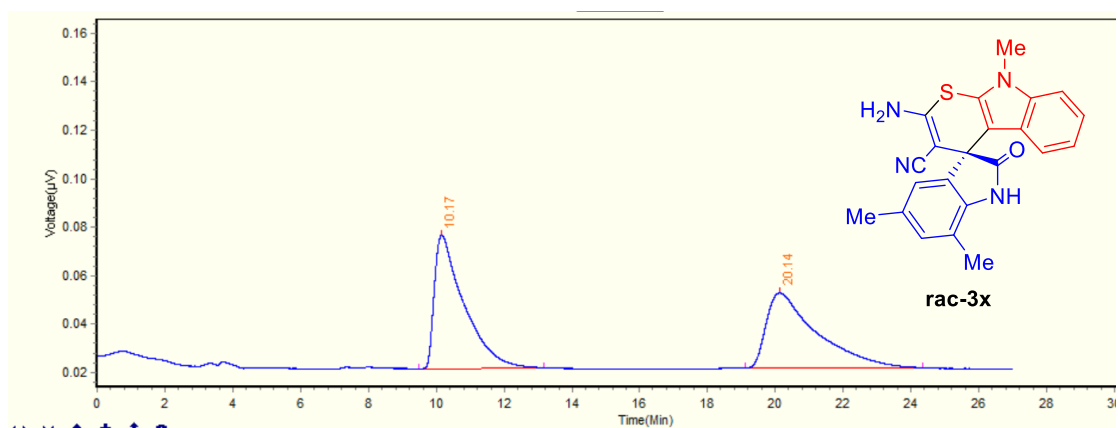

| Integration Result |                | Calculation Result | TimeTable   |              |            |    |           |
|--------------------|----------------|--------------------|-------------|--------------|------------|----|-----------|
| No.                | Retention Time | Peak Area          | Peak Height | Peak Area(%) | Peak Width |    | Peak Type |
| 1                  | 10.17          | 1658695            | 27559       | 50.92%       | 3.689      | BB |           |
| 2                  | 20.14          | 1598964            | 15510       | 49.08%       | 5.234      | BB |           |
| Total              |                | 3,257,659          | 43,069      | 100.00%      |            |    |           |

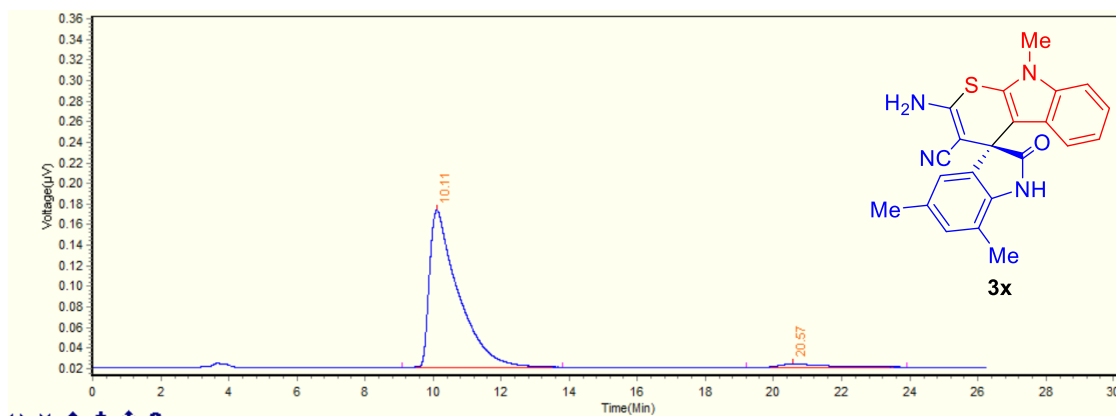

| Integration Result |                | Calculation Result | TimeTable   |              |            |    |           |
|--------------------|----------------|--------------------|-------------|--------------|------------|----|-----------|
| No.                | Retention Time | Peak Area          | Peak Height | Peak Area(%) | Peak Width |    | Peak Type |
| 1                  | 10.11          | 4469850            | 76336       | 97.04%       | 4.715      | BB |           |
| 2                  | 20.57          | 136541             | 1559        | 2.96%        | 4.714      | BB |           |
| Total              |                | 4,606,391          | 77,895      | 100.00%      |            |    |           |

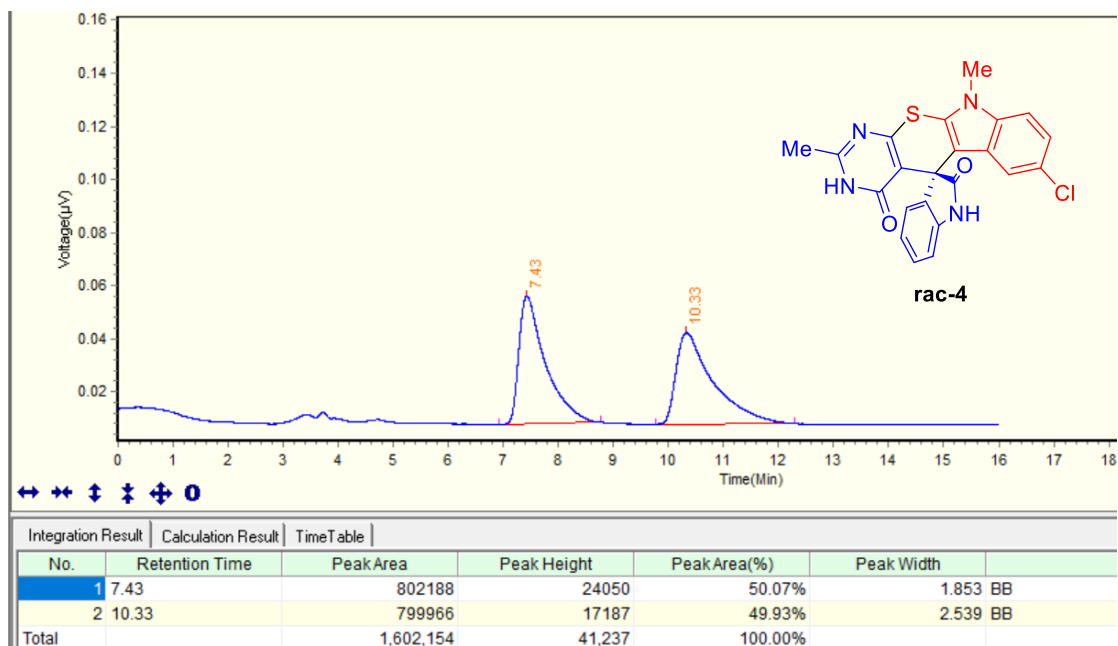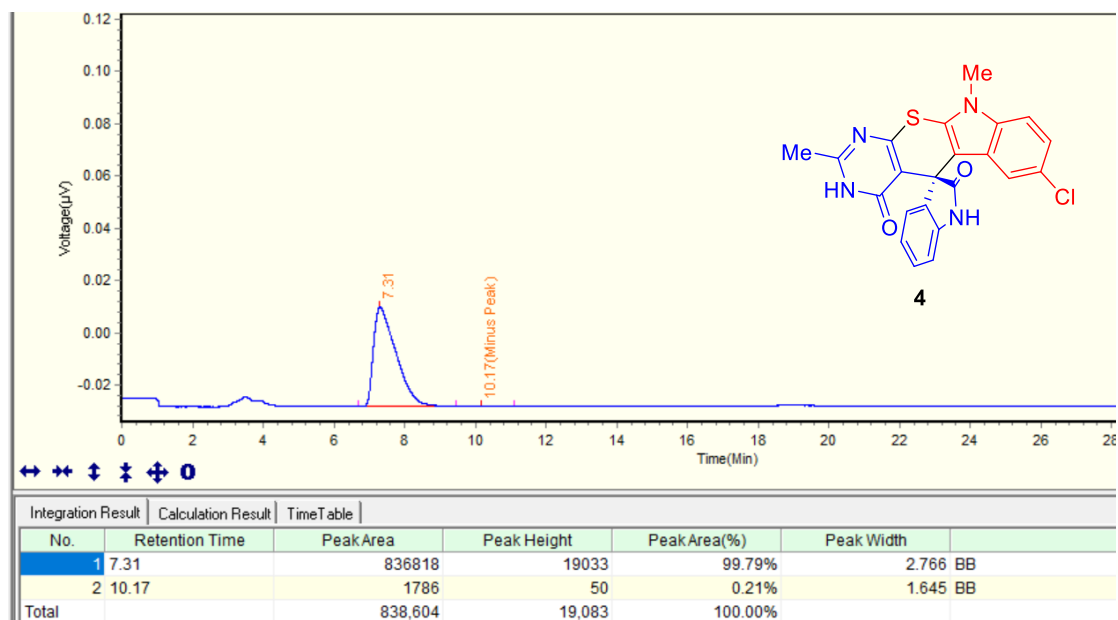

## Single-crystal X-ray diffraction of 3g (CCDC 2177975)

**3g** with ellipsoid contour at 30% probability level

X-ray analysis was carried out using the single crystal which was grown in Hexane/Acetone.

The instrumentation used for the crystal measurement is Bruker APEX-II CCD.

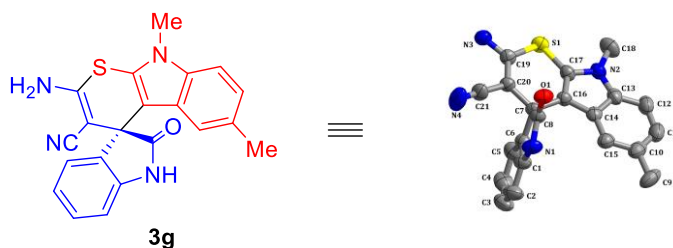

### checkCIF/PLATON report

You have not supplied any structure factors. As a result the full set of tests cannot be run.

THIS REPORT IS FOR GUIDANCE ONLY. IF USED AS PART OF A REVIEW PROCEDURE FOR PUBLICATION, IT SHOULD NOT REPLACE THE EXPERTISE OF AN EXPERIENCED CRYSTALLOGRAPHIC REFEREE.

No syntax errors found.    CIF dictionary    Interpreting this report

### Datablock: mo\_20220607c\_0ma

|                 |                |                    |               |
|-----------------|----------------|--------------------|---------------|
| Bond precision: | C-C = 0.0058 Å | Wavelength=0.71073 |               |
| Cell:           | a=30.2442 (9)  | b=14.4397 (4)      | c=10.3922 (2) |
|                 | alpha=90       | beta=102.923 (2)   | gamma=90      |
| Temperature:    | 296 K          |                    |               |

|                        | Calculated                 | Reported       |
|------------------------|----------------------------|----------------|
| Volume                 | 4423.5 (2)                 | 4423.5 (2)     |
| Space group            | C 2                        | C 1 2 1        |
| Hall group             | C 2y                       | C 2y           |
| Moiety formula         | C21 H16 N4 O S [+ solvent] | C21 H16 N4 O S |
| Sum formula            | C21 H16 N4 O S [+ solvent] | C21 H16 N4 O S |
| Mr                     | 372.44                     | 372.44         |
| Dx, g cm <sup>-3</sup> | 1.118                      | 1.118          |
| Z                      | 8                          | 8              |
| Mu (mm <sup>-1</sup> ) | 0.162                      | 0.162          |
| F000                   | 1552.0                     | 1552.0         |
| F000'                  | 1553.51                    |                |
| h, k, lmax             | 39, 18, 13                 | 39, 18, 13     |
| Nref                   | 10261 [ 5335]              | 10122          |
| Tmin, Tmax             | 0.985, 0.992               | 0.985, 0.992   |
| Tmin'                  | 0.981                      |                |

Correction method= # Reported T Limits: Tmin=0.985 Tmax=0.992  
AbsCorr = NONE

Data completeness= 1.90/0.99      Theta(max)= 27.583

|                                |                                   |
|--------------------------------|-----------------------------------|
| R(reflections)= 0.0505 ( 7757) | wR2(reflections)= 0.1533 ( 10122) |
| S = 1.025                      | Npar= 493                         |

The following ALERTS were generated. Each ALERT has the format  
**test-name\_ALERT\_alert-type\_alert-level.**  
Click on the hyperlinks for more details of the test.

---

 **Alert level C**

|                   |                                       |     |       |   |              |
|-------------------|---------------------------------------|-----|-------|---|--------------|
| PLAT230_ALERT_2_C | Hirshfeld Test Diff for               | C23 | --C24 | . | 5.6 s.u.     |
| PLAT334_ALERT_2_C | Small <C-C> Benzene Dist.             | C22 | --C27 | . | 1.37 Ang.    |
| PLAT340_ALERT_3_C | Low Bond Precision on C-C Bonds ..... |     |       |   | 0.00576 Ang. |
| PLAT420_ALERT_2_C | D-H Bond Without Acceptor             | N7  | --H7B | . | Please Check |

---

 **Alert level G**

|                   |                                                  |    |               |  |          |
|-------------------|--------------------------------------------------|----|---------------|--|----------|
| PLAT003_ALERT_2_G | Number of Uiso or Uij Restrained non-H Atoms ... |    |               |  | 2 Report |
| PLAT007_ALERT_5_G | Number of Unrefined Donor-H Atoms .....          |    |               |  | 6 Report |
| PLAT066_ALERT_1_G | Predicted and Reported Tmin&Tmax Range Identical |    |               |  | ? Check  |
| PLAT128_ALERT_4_G | Alternate Setting for Input Space Group          | C2 |               |  | I2 Note  |
| PLAT178_ALERT_4_G | The CIF-Embedded .res File Contains SIMU Records |    |               |  | 1 Report |
| PLAT606_ALERT_4_G | Solvent Accessible VOID(S) in Structure .....    |    |               |  | ! Info   |
| PLAT790_ALERT_4_G | Centre of Gravity not Within Unit Cell: Resd. #  |    |               |  | 2 Note   |
|                   | C21 H16 N4 O S                                   |    |               |  |          |
| PLAT791_ALERT_4_G | Model has Chirality at C7                        |    | (Sohnke SpGr) |  | S Verify |
| PLAT791_ALERT_4_G | Model has Chirality at C29                       |    | (Sohnke SpGr) |  | S Verify |
| PLAT860_ALERT_3_G | Number of Least-Squares Restraints .....         |    |               |  | 7 Note   |
| PLAT933_ALERT_2_G | Number of HKL-OMIT Records in Embedded .res File |    |               |  | 47 Note  |

---

0 **ALERT level A** = Most likely a serious problem - resolve or explain  
0 **ALERT level B** = A potentially serious problem, consider carefully  
4 **ALERT level C** = Check. Ensure it is not caused by an omission or oversight  
11 **ALERT level G** = General information/check it is not something unexpected

1 ALERT type 1 CIF construction/syntax error, inconsistent or missing data  
5 ALERT type 2 Indicator that the structure model may be wrong or deficient  
2 ALERT type 3 Indicator that the structure quality may be low  
6 ALERT type 4 Improvement, methodology, query or suggestion  
1 ALERT type 5 Informative message, check

---
